# Supplementary material
Source: Research Square preprint supplement (doi:10.21203/rs.3.rs-9415206/v1)
Supplement: Supplementary file 1 [file cbb703126b2648ebadda63aa.xlsx]

## Sheet: Main log book
Zone	District	Village	HH ID	HH Head Name	Latitude	Longitude	Structure floor	Structure roof	Structure wall	Windows screened	Eaves	Method of collection	Remark
Wolaita	Kindo Koysha	Belle	01	Tafese Goa	6.93154	37.53	Earth or sand	Corrugated iron sheet	Covered adobe	No	No	CDC
Wolaita	Kindo Koysha	Belle	02	Mada Gejabo	6.9317	37,530640	Earth or sand	Corrugated iron sheet	Covered adobe	No	No	CDC
Wolaita	Kindo Koysha	Belle	03	Dawit Elimo	6,931600	37.5293	Earth or sand	Corrugated iron sheet	Covered adobe	No	No	CDC
Wolaita	Kindo Koysha	Belle	04	Philmon Alito	6.9317	37,532580	Earth or sand	Corrugated iron sheet	Covered adobe	No	No	CDC
Wolaita	Kindo Koysha	Belle	05	Akililu Ayele	6.9323	37.5328	Earth or sand	Corrugated iron sheet	Covered adobe	Yes	No	CDC
Wolaita	Kindo Koysha	Belle	06	Masana Mandabo	6.93156	37,525400	Earth or sand	Corrugated iron sheet	Covered adobe	No	No	PSC
Wolaita	Kindo Koysha	Belle	07	Markos Manja	6.93222	37.5288	Earth or sand	Corrugated iron sheet	Covered adobe	No	No	PSC
Wolaita	Kindo Koysha	Belle	08	Mekonin Manija	6,932220	37.5287	Earth or sand	Corrugated iron sheet	Covered adobe	No	No	PSC
Wolaita	Kindo Koysha	Belle	09	Deneke Darcho	6.93158	37.5296	Cement/concrete	Corrugated iron sheet	Covered adobe	Yes	No	PSC
Wolaita	Kindo Koysha	Belle	10	Daniel Maretu	6.90878	37.5145	Cement/concrete	Corrugated iron sheet	Cement/cement blocks	No	No	CDC
Wolaita	Kindo Koysha	Belle	11	Semayat Mune	6.90931	37.5151	Earth or sand	Corrugated iron sheet	Covered adobe	No	No	CDC
Wolaita	Kindo Koysha	Belle	12	Tamirat Nigusse	6.90877	37.5153	Earth or sand	Corrugated iron sheet	Covered adobe	No	Yes	CDC
Wolaita	Kindo Koysha	Belle	13	Petros Koyra	6.90944	37.5142	Earth or sand	Corrugated iron sheet	Covered adobe	No	No	CDC
Wolaita	Kindo Koysha	Belle	14	Agona Asha	6,907640	37,517630	Earth or sand	Corrugated iron sheet	Covered adobe	No	No	CDC
Wolaita	Kindo Koysha	Belle	15	Ayane Juma	6,908300	37.5174	Earth or sand	Corrugated iron sheet	Covered adobe	No	No	PSC
Wolaita	Kindo Koysha	Belle	16	Abera Asha	6.90795	37.5169	Earth or sand	Corrugated iron sheet	Covered adobe	No	No	PSC
Wolaita	Kindo Koysha	Belle	17	Tesfahun Ashe	6.90763	37.5167	Earth or sand	Corrugated iron sheet	Covered adobe	No	No	PSC
Wolaita	Kindo Koysha	Belle	18	Dereje Dana	6.90815	37.5177	Earth or sand	Corrugated iron sheet	Covered adobe	No	No	PSC
Wolaita	Kindo Koysha	Belle	19	Elifiyos Ukure	6.90681	37.5193	Earth or sand	Corrugated iron sheet	Covered adobe	No	No	PSC
Wolaita	Kindo Koysha	Belle	20	Ephson Ukuke	6.90658	37.5198	Dung	Corrugated iron sheet	Covered adobe	No	No	PSC
Wolaita	Damot Weyde	Billate	01	Yohannes Dola	6.93454	38.1296	Earth or sand	Corrugated iron sheet	Covered adobe	No	No	CDC
Wolaita	Damot Weyde	Billate	02	Matusal Yona	6,934230	38.1292	Earth or Sand	Corrugated iron sheet	Covered adobe	No	No	CDC
Wolaita	Damot Weyde	Billate	03	Zinabu Ena	6.93411	38.1289	Earth or Sand	Corrugated iron sheet	Covered adobe	No	No	CDC
Wolaita	Damot Weyde	Billate	04	Abebe Ledamo	6,934310	38.1295	Earth or Sand	Corrugated iron sheet	Cement/cement blocks	No	No	CDC
Wolaita	Damot Weyde	Billate	05	Mengesha Manto	6.93349	38.1285	Cement/concret	Corrugated iron sheet	Covered adobe	No	No	CDC
Wolaita	Damot Weyde	Billate	06	Kalacho Tora	6,9338775	38.1288	Earth or Sand	Corrugated iron sheet	Covered adobe	No	No	PSC
Wolaita	Damot Weyde	Billate	07	Fanitu Tote	6.93361	38.1288	Cement/concret	Corrugated iron sheet	Covered adobe	No	No	PSC
Wolaita	Damot Weyde	Billate	08	Wondimagegn Garmame	6.93349	38.128	Earth or Sand	Corrugated iron sheet	Covered adobe	No	No	PSC
Wolaita	Damot Weyde	Billate	09	Marta Makulo	6.93377	38,129160	Earth or Sand	Corrugated iron sheet	Covered adobe	No	No	PSC
Wolaita	Damot Weyde	Billate	10	Abera Alesa	6.93474	38.1296	Earth or Sand	Corrugated iron sheet	Covered adobe	No	No	PSC
Wolaita	Damot Weyde	Billate	11	Bunie Altaye	6.93561	38.1303	Earth or Sand	Corrugated iron sheet	Covered adobe	No	No	CDC
Wolaita	Damot Weyde	Billate	12	Petros Kinfe	6.93614	38.1301	Cement/concret	Corrugated iron sheet	Cement/cement blocks	No	No	CDC
Wolaita	Damot Weyde	Billate	13	Mesele Seifu	6,935740	38.131	Earth or Sand	Corrugated iron sheet	Covered adobe	No	No	CDC
Wolaita	Damot Weyde	Billate	14	Bereket Dagata	6,935480	38.1308	Earth or Sand	Corrugated iron sheet	Covered adobe	No	No	CDC
Wolaita	Damot Weyde	Billate	15	Desalegn Lemma	6.9355	38,131210	Cement/concret	Corrugated iron sheet	Covered adobe	No	No	CDC
Wolaita	Damot Weyde	Billate	16	Bergude Kora	6.93537	38.1311	Cement/concret	Corrugated iron sheet	Covered adobe	No	No	PSC
Wolaita	Damot Weyde	Billate	17	Genet Tonga	6.93565	38,129750	Cement/concret	Corrugated iron sheet	Cement/cement blocks	No	No	PSC
Wolaita	Damot Weyde	Billate	18	Eyerusalem Kuliyem	6.93565	38.1311	Cement/concret	Corrugated iron sheet	Cement/cement blocks	No	No	PSC
Wolaita	Damot Weyde	Billate	19	Mulatu Gebeyehu	6.93619	38.1299	Earth or Sand	Corrugated iron sheet	Covered adobe	No	No	PSC
Wolaita	Damot Weyde	Billate	20	Tamirat Yigezu	6.93578	38.1304	Cement/concret	Corrugated iron sheet	Cement/cement blocks	No	No	PSC
Gamo	Arba Minch	Arba Minch town	01	Docho Tento	6.0039	37.5356	Earth or Sand	Corrugated iron sheet	Covered adobe	No	No	CDC
Gamo	Arba Minch	Arba Minch town	02	Alemneh Kallo	6,004040	37,535480	Earth or sand	Corrugated iron sheet	Covered adobe	No	No	CDC
Gamo	Arba Minch	Arba Minch town	03	Tadesse Amare	6,004000	37,536300	Earth or sand	Corrugated iron sheet	Covered adobe	No	No	PSC
Gamo	Arba Minch	Arba Minch town	04	Aman Ergadu	6.00406	37,536299	Earth or sand	Corrugated iron sheet	Covered adobe	No	No	PSC
Gamo	Arba Minch	Arba Minch town	05	Genene Sisay	6,003980	37,536350	Earth or sand	Corrugated iron sheet	Covered adobe	No	No	PSC
Gamo	Arba Minch	Arba Minch town	06	Almaz Boka	6,003230	37,536690	Cement/concrete	Corrugated iron sheet	Covered adobe	No	No	CDC
Gamo	Arba Minch	Arba Minch town	07	Fasho Tusume	6,003180	37,536170	Earth or sand	Corrugated iron sheet	Covered adobe	No	No	CDC
Gamo	Arba Minch	Arba Minch town	08	Yosef Dayage	6,006260	37,537490	Cement/concrete	Corrugated iron sheet	Covered adobe	No	No	PSC
Gamo	Arba Minch	Arba Minch town	09	Abebech Kanko	6,006220	37,537270	Cement/concrete	Corrugated iron sheet	Covered adobe	No	No	PSC
Gamo	Arba Minch	Arba Minch town	10	Abraham Awulo	6,004040	37,535480	Earth or sand	Corrugated iron sheet	Covered adobe	No	No	PSC
Gamo	Arba Minch	Arba Minch town	11	Asrat Kume	6,006830	37,536990	Cement/concrete	Corrugated iron sheet	Cement/cement blocks	No	No	PSC
Gamo	Arba Minch	Arba Minch town	12	Worba Wozito	6.00741	37,536990	Earth or sand	Corrugated iron sheet	Covered adobe	No	No	PSC
Gamo	Arba Minch	Arba Minch town	13	Emiro Enkoye	6,004070	37,535990	Earth or sand	Corrugated iron sheet	Covered adobe	No	No	CDC
Gamo	Arba Minch	Arba Minch town	14	Sintayehu Anjulo	6,004020	37,536360	Cement/concrete	Corrugated iron sheet	Covered adobe	No	No	CDC
Gamo	Arba Minch	Arba Minch town	15	Manate Tsewge	6,005580	37,538370	Cement/concrete	Corrugated iron sheet	Covered adobe	No	No	CDC
Gamo	Arba Minch	Arba Minch town	16	Zika Atoro	6,005970	37,538090	Earth or sand	Corrugated iron sheet	Covered adobe	No	No	PSC
Gamo	Arba Minch	Arba Minch town	17	Getachew Abera	6,006140	37,537690	Cement/concrete	Corrugated iron sheet	Cement/cement blocks	No	No	PSC
Gamo	Arba Minch	Arba Minch town	18	Birhanu Gadebo	6,032420	37,567800	Cement/concrete	Corrugated iron sheet	Cement/cement blocks	No	No	CDC
Gamo	Arba Minch	Arba Minch town	19	Wolde Chollo	6,032390	37,567220	Cement/concrete	Corrugated iron sheet	Cement/cement blocks	No	No	CDC
Gamo	Arba Minch	Arba Minch town	20	Ofoche Orzamo	6,032240	37,567800	Cement/concrete	Corrugated iron sheet	Cement/cement blocks	No	No	CDC
Gamo	Arba Minch	Arba Minch town	21	Yohannis Wagesho	6,032390	37,567220	Cement/concrete	Corrugated iron sheet	Cement/cement blocks	No	No	CDC											Extra
South Omo	Dasenech	Omorate	01	Yosef Soboka	4.80211	36.0489	Cement/concrete	Corrugated iron sheet	Cement/cement blocks	No	No	CDC
South Omo	Dasenech	Omorate	02	Ahimed Jillo	4.80092	36.0488	Cement/concrete	Corrugated iron sheet	Cement/cement blocks	No	No	CDC
South Omo	Dasenech	Omorate	03	Desalegn Gossaye	4.80162	36.0497	Earth or sand	Corrugated iron sheet	Covered adobe	No	No	CDC
South Omo	Dasenech	Omorate	04	Masresha Abera	4.80062	36.0493	Earth or sand	Corrugated iron sheet	Covered adobe	No	No	CDC											R-2_PSC
South Omo	Dasenech	Omorate	05	Melkamu Abeje	4.80292	36.0503	Cement/concrete	Corrugated iron sheet	Covered adobe	No	No	PSC
South Omo	Dasenech	Omorate	06	Gebremedin Kassa	4.80074	36.0506	Cement/concrete	Corrugated iron sheet	Covered adobe	No	No	PSC											R-2_CDC
South Omo	Dasenech	Omorate	07	Abebe Anteneh	4.80121	36.0504	Earth or sand	Corrugated iron sheet	Covered adobe	No	No	PSC
South Omo	Dasenech	Omorate	08	Wude Gejabo	4.80105	36.0506	Earth or sand	Wood/planks	Stone with mud	No	No	PSC
South Omo	Dasenech	Omorate	09	Demelash Kunta	4.8008	36.0507	Earth or sand	Corrugated iron sheet	Covered adobe	No	No	PSC											R-2_Replaced
South Omo	Dasenech	Omorate	10	Bereket Yosef	4,803060	36.0502	Cement/concrete	Corrugated iron sheet	Corrugated iron sheet	No	No	PSC
South Omo	Dasenech	Omorate	11	Ansha	4,802560	36,049960	Cement/concrete	Corrugated iron sheet	Covered adobe	No	No	CDC											R-2_Replaced
South Omo	Dasenech	Omorate	12	Dereje Aka	4,801670	36,055530	Cement/concrete	Corrugated iron sheet	Cement/cement blocks	No	No	CDC
South Omo	Dasenech	Omorate	13	Bayush Biizuneh	4,801770	36,049660	Earth or sand	Corrugated iron sheet	Covered adobe	No	No	CDC
South Omo	Dasenech	Omorate	14	Bizuhareg Habitamu	4,801790	36,050430	Earth or sand	Corrugated iron sheet	Covered adobe	No	No	CDC
South Omo	Dasenech	Omorate	15	Alemu Mebre	4,801830	36,049720	Earth or sand	Corrugated iron sheet	Covered adobe	No	No	CDC
South Omo	Dasenech	Omorate	16	Getahun Simon	4,802090	36,050060	Cement/concrete	Corrugated iron sheet	Cement/cement blocks	No	No	CDC
South Omo	Dasenech	Omorate	17	Meseret Bekele	4.80195	36.0503	Earth or sand	Corrugated iron sheet	Covered adobe	No	No	PSC
South Omo	Dasenech	Omorate	18	Amarech Yamie	4.80192	36.0504	Earth or sand	Corrugated iron sheet	Covered adobe	No	No	PSC
South Omo	Dasenech	Omorate	19	Abeli	4,802710	36,050190	Cement/concrete	Corrugated iron sheet	Covered adobe	No	No	PSC
South Omo	Dasenech	Omorate	20	Meskerem Dand	4.80212	36,050400	Earth or sand	Corrugated iron sheet	Covered adobe	No	No	PSC											R-2_Replaced
South Omo	Selamago	Hana	01	Zenebe Terefe	6.22642	36.1289	Cement/concrete	Corrugated iron sheet	Covered adobe	No	No	CDC
South Omo	Selamago	Hana	02	Ameniku Tikatu	6,226210	36,127850	Earth or sand	Corrugated iron sheet	Covered adobe	No	No	CDC
South Omo	Selamago	Hana	03	Aynetu Dilko	6.22666	36.129	Cement/concrete	Corrugated iron sheet	Cement/cement blocks	No	No	PSC
South Omo	Selamago	Hana	04	Mekuwanit Mesimayo	6.22567	36.1278	Cement/concrete	Corrugated iron sheet	Cement/cement blocks	No	No	PSC											R-2_CDC
South Omo	Selamago	Hana	05	Adane Cherinet	6,226470	36.1292	Cement/concrete	Corrugated iron sheet	Covered adobe	No	No	PSC											R-2_CDC
South Omo	Selamago	Hana	06	Birhanu Habtamu	6.22444	36.1271	Earth or sand	Corrugated iron sheet	Covered adobe	No	No	PSC											R-2_Replaced
South Omo	Selamago	Hana	07	Kasahun Amare	6.22371	36.1268	Cement/concrete	Corrugated iron sheet	Cement/cement blocks	No	No	CDC											R-2_Replaced
South Omo	Selamago	Hana	08	Bekele Dano	6.22333	36.1269	Earth or sand	Corrugated iron sheet	Covered adobe	No	No	CDC
South Omo	Selamago	Hana	09	Getayawkal Yalew	6.22382	36.1278	Cement/concrete	Corrugated iron sheet	Cement/cement blocks	No	No	PSC											R-2_CDC
South Omo	Selamago	Hana	10	Onyo Chano	6.22443	36.1277	Cement/concrete	Corrugated iron sheet	Covered adobe	No	No	PSC											R-2_CDC
South Omo	Selamago	Hana	11	Adisu Karo	6.22511	36.1314	Cement/concrete	Corrugated iron sheet	Covered adobe	No	No	CDC
South Omo	Selamago	Hana	12	Tizazu Loha	6.22525	36,131330	Earth or sand	Corrugated iron sheet	Covered adobe	No	No	CDC
South Omo	Selamago	Hana	13	Mekonin Melese	6.22575	36.1313	Earth or sand	Corrugated iron sheet	Covered adobe	No	No	CDC
South Omo	Selamago	Hana	14	S.Police Office	6,226450	36.1319	Cement/concrete	Corrugated iron sheet	Cement/cement blocks	No	No	CDC
South Omo	Selamago	Hana	15	Hana Hostel-2	6.22547	36.1327	Cement/concrete	Corrugated iron sheet	Cement/cement blocks	No	No	CDC											R-2_PSC*
South Omo	Selamago	Hana	16	Hana Hostel-1	6.22498	36.1319	Cement/concrete	Corrugated iron sheet	Cement/cement blocks	No	No	CDC											R-2_PSC*
South Omo	Selamago	Hana	17	Dawit Belayne	6.22676	36.1311	Earth or sand	Corrugated iron sheet	Covered adobe	No	No	PSC											R-2_CDC*
South Omo	Selamago	Hana	18	Tadiyos Duta	6.22747	36.1305	Cement/concrete	Corrugated iron sheet	Cement/cement blocks	No	No	PSC
South Omo	Selamago	Hana	19	Ermias Elias	6.22454	36.1307	Cement/concrete	Corrugated iron sheet	Cement/cement blocks	No	No	PSC											R-2_Replaced
South Omo	Selamago	Hana	20	Bokecha Bekele	6,224200	36,129440	Earth or sand	Corrugated iron sheet	Covered adobe	No	No	PSC											R-2_CDC

## Sheet: Coding notes
Sites	Site ID	HH ID	Method ID	Sample ID
Belle	01	01,02,….	CDC-01, PSC-02	01,02….
Billate	02	01,02,….	CDC-01, PSC-02	01,02….
Arba Minch	03	01,02,….	CDC-01, PSC-02	01,02….
Omorate	04	01,02,….	CDC-01, PSC-02	01,02….
Hana	05	01,02,….	CDC-01, PSC-02	01,02….
Example	01050109
	Descriptions:
	Site	Bellec (01)
	HH	05
	Method	CDC (01)
	Sample	09

## Sheet: All Mosquito data
HH code	Latitude	Longitude	Round	Date of collection	Collection method	Location of collection	Morphological ID	Abdominal status	PCR-BM result	CSP-result	nPCR-Plasmodium result
01010101	6.93154	37.53	1	01-04/11/2022	CDC	In	An.gambiae	UF		Neg
01010102	6.93154	37.53	1	01-04/11/2022	CDC	In	An.gambiae	UF		Neg
01010103	6.93154	37.53	1	01-04/11/2022	CDC	In	An.gambiae	UF		Neg
01010104	6.93154	37.53	1	01-04/11/2022	CDC	In	An.gambiae	UF		Neg
01010105	6.93154	37.53	1	01-04/11/2022	CDC	In	An.gambiae	HG	Goat and Human	Neg	Pf
01010106	6.93154	37.53	1	01-04/11/2022	CDC	In	An.gambiae	UF		Neg
01010107	6.93154	37.53	1	01-04/11/2022	CDC	In	An.gambiae	UF		Neg
01010108	6.93154	37.53	1	01-04/11/2022	CDC	Out	An.gambiae	FF	Goat and Human	Neg	Neg
01010109	6.93154	37.53	1	01-04/11/2022	CDC	Out	An.gambiae	FF	Goat and Human	Neg	Pf+Pv
01020101	6.9317	37,530640	1	01-04/11/2022	CDC	In	An.gambiae	UF		Neg
01030101	6,931600	37.5293	1	01-04/11/2022	CDC	In	An.gambiae	FF	Goat	Neg	Neg
01030102	6,931600	37.5293	1	01-04/11/2022	CDC	In	An.gambiae	UF		Neg
01030103	6,931600	37.5293	1	01-04/11/2022	CDC	In	An.gambiae	UF		Neg
01030104	6,931600	37.5293	1	01-04/11/2022	CDC	In	An.gambiae	FF	Negative	Neg	Neg
01030105	6,931600	37.5293	1	01-04/11/2022	CDC	Out	An.gambiae	UF		Neg
01030106	6,931600	37.5293	1	01-04/11/2022	CDC	Out	An.gambiae	UF		Neg
01030107	6,931600	37.5293	1	01-04/11/2022	CDC	Out	An.gambiae	UF		Neg
01030108	6,931600	37.5293	1	01-04/11/2022	CDC	Out	An.gambiae	FF	Goat and Human	Neg	Pf
01040101	6.9317	37,532580	1	01-04/11/2022	CDC	In	An.gambiae	UF		Neg
01040102	6.9317	37,532580	1	01-04/11/2022	CDC	In	An.gambiae	HG	Negative	Neg	Neg
01040103	6.9317	37,532580	1	01-04/11/2022	CDC	Out	An.gambiae	UF		Neg
01050101	6.9323	37.5328	1	01-04/11/2022	CDC	In	An.gambiae	UF		Neg
01050102	6.9323	37.5328	1	01-04/11/2022	CDC	In	An.gambiae	UF		Neg
01050103	6.9323	37.5328	1	01-04/11/2022	CDC	In	An.gambiae	UF		Neg
01050104	6.9323	37.5328	1	01-04/11/2022	CDC	In	An.gambiae	UF		Neg
01050105	6.9323	37.5328	1	01-04/11/2022	CDC	In	An.gambiae	UF		Neg
01050106	6.9323	37.5328	1	01-04/11/2022	CDC	In	An.gambiae	HG	Human	Neg	Neg
01050107	6.9323	37.5328	1	01-04/11/2022	CDC	In	An.gambiae	HG	Human	Neg	Pv
01050108	6.9323	37.5328	1	01-04/11/2022	CDC	In	An.gambiae	HG	Human	Neg	Neg
01050109	6.9323	37.5328	1	01-04/11/2022	CDC	In	An.gambiae	UF		Neg
01050110	6.9323	37.5328	1	01-04/11/2022	CDC	In	An.gambiae	UF		Neg
01050111	6.9323	37.5328	1	01-04/11/2022	CDC	In	An.gambiae	UF		Neg
01050112	6.9323	37.5328	1	01-04/11/2022	CDC	In	An.gambiae	UF		Pf
01050113	6.9323	37.5328	1	01-04/11/2022	CDC	In	An.gambiae	HG	Pig	Neg	Neg
01050114	6.9323	37.5328	1	01-04/11/2022	CDC	In	An.gambiae	FF	Goat and Cow	Neg	Pv
01050115	6.9323	37.5328	1	01-04/11/2022	CDC	In	An.gambiae	UF		Neg
01050116	6.9323	37.5328	1	01-04/11/2022	CDC	In	An.gambiae	UF		Neg
01050117	6.9323	37.5328	1	01-04/11/2022	CDC	In	An.gambiae	UF		Neg
01050118	6.9323	37.5328	1	01-04/11/2022	CDC	In	An.gambiae	UF		Neg
01050119	6.9323	37.5328	1	01-04/11/2022	CDC	In	An.gambiae	UF		Neg
01050120	6.9323	37.5328	1	01-04/11/2022	CDC	In	An.gambiae	UF		Neg
01050121	6.9323	37.5328	1	01-04/11/2022	CDC	In	An.gambiae	UF		Neg
01050122	6.9323	37.5328	1	01-04/11/2022	CDC	In	An.gambiae	UF		Neg
01050123	6.9323	37.5328	1	01-04/11/2022	CDC	In	An.gambiae	FF	Goat and Human	Neg	Neg
01060201	6.93156	37,525400	1	01-04/11/2022	PSC	In	An.gambiae	FF	Negative	Neg	Neg
01060202	6.93156	37,525400	1	01-04/11/2022	PSC	In	An.gambiae	UF		Neg
01100101	6.90878	37.5145	1	01-04/11/2022	CDC	In	An.gambiae	UF		Neg
01100102	6.90878	37.5145	1	01-04/11/2022	CDC	In	An.gambiae	UF		Neg
01100103	6.90878	37.5145	1	01-04/11/2022	CDC	In	An.gambiae	UF		Neg
01100104	6.90878	37.5145	1	01-04/11/2022	CDC	In	An.gambiae	HG	Goat and Human	Neg	Neg
01100105	6.90878	37.5145	1	01-04/11/2022	CDC	In	An.gambiae	UF		Neg
01110101	6.90931	37.5151	1	01-04/11/2022	CDC	In	An.gambiae	FF	Human and Cow	Neg	Neg
01110102	6.90931	37.5151	1	01-04/11/2022	CDC	In	An.gambiae	UF		Neg
01110103	6.90931	37.5151	1	01-04/11/2022	CDC	In	An.gambiae	UF		Neg
01110104	6.90931	37.5151	1	01-04/11/2022	CDC	In	An.gambiae	UF		Neg
01110105	6.90931	37.5151	1	01-04/11/2022	CDC	In	An.gambiae	UF		Neg
01110106	6.90931	37.5151	1	01-04/11/2022	CDC	In	An.gambiae	UF		Neg
01110107	6.90931	37.5151	1	01-04/11/2022	CDC	In	An.gambiae	UF		Neg
01110108	6.90931	37.5151	1	01-04/11/2022	CDC	In	An.gambiae	UF		Neg
01110109	6.90931	37.5151	1	01-04/11/2022	CDC	In	An.gambiae	UF		Neg
01110110	6.90931	37.5151	1	01-04/11/2022	CDC	In	An.gambiae	FF	Goat and Cow	Neg	Neg
01110111	6.90931	37.5151	1	01-04/11/2022	CDC	In	An.gambiae	FF	Goat and Human	Neg	Neg
01110112	6.90931	37.5151	1	01-04/11/2022	CDC	In	An.gambiae	UF		Neg
01110113	6.90931	37.5151	1	01-04/11/2022	CDC	In	An.gambiae	UF		Neg
01110114	6.90931	37.5151	1	01-04/11/2022	CDC	In	An.gambiae	FF	Goat and Human	Neg	Neg
01110115	6.90931	37.5151	1	01-04/11/2022	CDC	In	An.gambiae	UF		Neg
01110116	6.90931	37.5151	1	01-04/11/2022	CDC	In	An.gambiae	FF	Goat and Human	Neg	Neg
01110117	6.90931	37.5151	1	01-04/11/2022	CDC	Out	An.gambiae	FF	Goat and Human	Neg	Pf+Pv
01110118	6.90931	37.5151	1	01-04/11/2022	CDC	Out	An.gambiae	UF		Neg
01120101	6.90877	37.5153	1	01-04/11/2022	CDC	In	An.gambiae	UF		Neg
01120102	6.90877	37.5153	1	01-04/11/2022	CDC	In	An.gambiae	UF		Neg
01120103	6.90877	37.5153	1	01-04/11/2022	CDC	In	An.gambiae	UF		Neg
01120104	6.90877	37.5153	1	01-04/11/2022	CDC	In	An.gambiae	UF		Neg
01120105	6.90877	37.5153	1	01-04/11/2022	CDC	In	An.gambiae	UF		Neg
01120106	6.90877	37.5153	1	01-04/11/2022	CDC	In	An.gambiae	UF		Neg
01120107	6.90877	37.5153	1	01-04/11/2022	CDC	In	An.gambiae	UF		Neg
01120108	6.90877	37.5153	1	01-04/11/2022	CDC	In	An.gambiae	UF		Neg
01120109	6.90877	37.5153	1	01-04/11/2022	CDC	In	An.gambiae	UF		Neg
01120110	6.90877	37.5153	1	01-04/11/2022	CDC	In	An.gambiae	UF		Neg
01120111	6.90877	37.5153	1	01-04/11/2022	CDC	In	An.gambiae	UF		Neg
01120112	6.90877	37.5153	1	01-04/11/2022	CDC	In	An.gambiae	UF		Neg
01120113	6.90877	37.5153	1	01-04/11/2022	CDC	In	An.gambiae	UF		Neg
01120114	6.90877	37.5153	1	01-04/11/2022	CDC	In	An.gambiae	UF		Neg
01120115	6.90877	37.5153	1	01-04/11/2022	CDC	In	An.gambiae	HG	Goat and Human	Neg	Neg
01120116	6.90877	37.5153	1	01-04/11/2022	CDC	In	An.gambiae	UF		Neg
01120117	6.90877	37.5153	1	01-04/11/2022	CDC	In	An.gambiae	FF	Goat and Human	Neg	Neg
01120118	6.90877	37.5153	1	01-04/11/2022	CDC	In	An.gambiae	UF		Neg
01120119	6.90877	37.5153	1	01-04/11/2022	CDC	In	An.gambiae	UF		Neg
01120120	6.90877	37.5153	1	01-04/11/2022	CDC	In	An.gambiae	FF	Goat and Human	Neg	Neg
01120121	6.90877	37.5153	1	01-04/11/2022	CDC	Out	An.gambiae	UF		Neg
01120122	6.90877	37.5153	1	01-04/11/2022	CDC	Out	An.gambiae	UF		Neg
01130101	6.90944	37.5142	1	01-04/11/2022	CDC	In	An.gambiae	UF		Neg
01130102	6.90944	37.5142	1	01-04/11/2022	CDC	In	An.gambiae	UF		Neg
01130103	6.90944	37.5142	1	01-04/11/2022	CDC	In	An.gambiae	UF		Neg
01130104	6.90944	37.5142	1	01-04/11/2022	CDC	In	An.gambiae	UF		Neg
01130105	6.90944	37.5142	1	01-04/11/2022	CDC	In	An.gambiae	UF		Neg
01130106	6.90944	37.5142	1	01-04/11/2022	CDC	In	An.gambiae	UF		Neg
01130107	6.90944	37.5142	1	01-04/11/2022	CDC	In	An.gambiae	UF		Neg
01130108	6.90944	37.5142	1	01-04/11/2022	CDC	In	An.gambiae	UF		Neg
01130109	6.90944	37.5142	1	01-04/11/2022	CDC	In	An.gambiae	UF		Neg
01130110	6.90944	37.5142	1	01-04/11/2022	CDC	In	An.gambiae	UF		Neg
01130111	6.90944	37.5142	1	01-04/11/2022	CDC	In	An.gambiae	UF		Neg
01130112	6.90944	37.5142	1	01-04/11/2022	CDC	In	An.gambiae	UF		Neg
01130113	6.90944	37.5142	1	01-04/11/2022	CDC	In	An.gambiae	UF		Neg
01130114	6.90944	37.5142	1	01-04/11/2022	CDC	In	An.gambiae	UF		Neg
01130115	6.90944	37.5142	1	01-04/11/2022	CDC	In	An.gambiae	UF		Neg
01130116	6.90944	37.5142	1	01-04/11/2022	CDC	In	An.gambiae	UF		Neg
01130117	6.90944	37.5142	1	01-04/11/2022	CDC	In	An.gambiae	UF		Neg
01130118	6.90944	37.5142	1	01-04/11/2022	CDC	In	An.gambiae	FF	Goat	Neg	Neg
01130119	6.90944	37.5142	1	01-04/11/2022	CDC	In	An.gambiae	UF		Neg
01130120	6.90944	37.5142	1	01-04/11/2022	CDC	In	An.gambiae	UF		Neg
01130121	6.90944	37.5142	1	01-04/11/2022	CDC	In	An.gambiae	UF		Neg
01130122	6.90944	37.5142	1	01-04/11/2022	CDC	In	An.gambiae	UF		Neg
01130123	6.90944	37.5142	1	01-04/11/2022	CDC	In	An.gambiae	UF		Neg
01130124	6.90944	37.5142	1	01-04/11/2022	CDC	In	An.gambiae	UF		Neg
01130125	6.90944	37.5142	1	01-04/11/2022	CDC	In	An.gambiae	FF	Goat	Neg	Neg
01130126	6.90944	37.5142	1	01-04/11/2022	CDC	In	An.gambiae	UF		Neg
01130127	6.90944	37.5142	1	01-04/11/2022	CDC	In	An.gambiae	UF		Neg
01130128	6.90944	37.5142	1	01-04/11/2022	CDC	In	An.gambiae	UF		Neg
01130129	6.90944	37.5142	1	01-04/11/2022	CDC	In	An.gambiae	UF		Neg
01130130	6.90944	37.5142	1	01-04/11/2022	CDC	In	An.gambiae	UF		Neg
01130131	6.90944	37.5142	1	01-04/11/2022	CDC	In	An.gambiae	FF	Goat and Human	Neg	Neg
01130132	6.90944	37.5142	1	01-04/11/2022	CDC	In	An.gambiae	HG	Negative	Neg	Neg
01130133	6.90944	37.5142	1	01-04/11/2022	CDC	In	An.gambiae	FF	Goat	Neg	Neg
01130134	6.90944	37.5142	1	01-04/11/2022	CDC	In	An.gambiae	FF	Negative	Neg	Neg
01130135	6.90944	37.5142	1	01-04/11/2022	CDC	In	An.gambiae	UF		Neg
01130136	6.90944	37.5142	1	01-04/11/2022	CDC	In	An.gambiae	UF		Neg
01130137	6.90944	37.5142	1	01-04/11/2022	CDC	In	An.gambiae	UF		Neg
01130138	6.90944	37.5142	1	01-04/11/2022	CDC	In	An.gambiae	UF		Neg
01130139	6.90944	37.5142	1	01-04/11/2022	CDC	In	An.gambiae	UF		Neg
01140101	6,907640	37,517630	1	01-04/11/2022	CDC	In	An.gambiae	UF		Neg
01140102	6,907640	37,517630	1	01-04/11/2022	CDC	In	An.gambiae	HG	Goat and Human	Neg	Pf+Pv
01140103	6,907640	37,517630	1	01-04/11/2022	CDC	In	An.gambiae	UF		Neg
01140104	6,907640	37,517630	1	01-04/11/2022	CDC	In	An.gambiae	HG	Goat and Cow	Neg	Neg
01140105	6,907640	37,517630	1	01-04/11/2022	CDC	In	An.gambiae	UF		Neg
01140106	6,907640	37,517630	1	01-04/11/2022	CDC	In	An.gambiae	UF		Neg
01140107	6,907640	37,517630	1	01-04/11/2022	CDC	In	An.gambiae	FF	Goat, Human and Cow	Neg	Pf+Pv
01160201	6.90795	37.5169	1	01-04/11/2022	PSC	In	An.gambiae	UF		Neg
01160202	6.90795	37.5169	1	01-04/11/2022	PSC	In	An.gambiae	HG	Goat and Human	Neg	Pf+Pv
01160203	6.90795	37.5169	1	01-04/11/2022	PSC	In	An.gambiae	UF		Neg
01160204	6.90795	37.5169	1	01-04/11/2022	PSC	In	An.gambiae	UF		Neg
01160205	6.90795	37.5169	1	01-04/11/2022	PSC	In	An.gambiae	FF	Goat and Human	Neg	Neg
01160206	6.90795	37.5169	1	01-04/11/2022	PSC	In	An.gambiae	FF	Goat and Human	Neg	Neg
01160207	6.90795	37.5169	1	01-04/11/2022	PSC	In	An.gambiae	UF		Neg
01160208	6.90795	37.5169	1	01-04/11/2022	PSC	In	An.gambiae	HG	Goat, Human and Cow	Neg	Neg
01160209	6.90795	37.5169	1	01-04/11/2022	PSC	In	An.gambiae	FF	Goat and Human	Neg	Neg
01160210	6.90795	37.5169	1	01-04/11/2022	PSC	In	An.gambiae	FF	Goat and Human	Neg	Neg
01160211	6.90795	37.5169	1	01-04/11/2022	PSC	In	An.gambiae	HG	Goat and Human	Neg	Neg
01160212	6.90795	37.5169	1	01-04/11/2022	PSC	In	An.gambiae	HG	Goat and Human	Neg	Neg
01160213	6.90795	37.5169	1	01-04/11/2022	PSC	In	An.gambiae	HG	Goat and Human	Neg	Pv
01160214	6.90795	37.5169	1	01-04/11/2022	PSC	In	An.gambiae	UF		Neg
01160215	6.90795	37.5169	1	01-04/11/2022	PSC	In	An.gambiae	HG	Goat and Cow	Neg	Neg
01160216	6.90795	37.5169	1	01-04/11/2022	PSC	In	An.gambiae	UF		Neg
01160217	6.90795	37.5169	1	01-04/11/2022	PSC	In	An.gambiae	FF	Goat	Neg	Neg
01160218	6.90795	37.5169	1	01-04/11/2022	PSC	In	An.gambiae	HG	Goat and Human	Neg	Pv
01170201	6.90763	37.5167	1	01-04/11/2022	PSC	In	An.gambiae	UF		Neg
01170202	6.90763	37.5167	1	01-04/11/2022	PSC	In	An.gambiae	FF	Goat and Human	Neg	Neg
01170203	6.90763	37.5167	1	01-04/11/2022	PSC	In	An.gambiae	HG	Goat and Human	Neg	Neg
01170204	6.90763	37.5167	1	01-04/11/2022	PSC	In	An.gambiae	UF		Neg
01170205	6.90763	37.5167	1	01-04/11/2022	PSC	In	An.gambiae	HG	Goat and Cow	Neg	Pv
01170206	6.90763	37.5167	1	01-04/11/2022	PSC	In	An.gambiae	FF	Goat	Neg	Neg
01170207	6.90763	37.5167	1	01-04/11/2022	PSC	In	An.gambiae	UF		Neg
01180201	6.90815	37.5177	1	01-04/11/2022	PSC	In	An.gambiae	FF	Goat and Human	Neg	Neg
01180202	6.90815	37.5177	1	01-04/11/2022	PSC	In	An.gambiae	FF	Goat and Human	Neg	Neg
01180203	6.90815	37.5177	1	01-04/11/2022	PSC	In	An.gambiae	UF		Neg
01180204	6.90815	37.5177	1	01-04/11/2022	PSC	In	An.gambiae	FF	Negative	Neg	Neg
01180205	6.90815	37.5177	1	01-04/11/2022	PSC	In	An.gambiae	FF	Goat and Human	Neg	Neg
01190201	6.90681	37.5193	1	01-04/11/2022	PSC	In	An.gambiae	UF		Neg
01190202	6.90681	37.5193	1	01-04/11/2022	PSC	In	An.gambiae	FF	Goat and Human	Neg	Neg
01190203	6.90681	37.5193	1	01-04/11/2022	PSC	In	An.gambiae	FF	Goat and Human	Neg	Neg
01190204	6.90681	37.5193	1	01-04/11/2022	PSC	In	An.gambiae	HG	Goat and Cow	Neg	Neg
01190205	6.90681	37.5193	1	01-04/11/2022	PSC	In	An.gambiae	FF	Goat and Human	Neg	Neg
01190206	6.90681	37.5193	1	01-04/11/2022	PSC	In	An.gambiae	FF	Human	Neg	Neg
01190207	6.90681	37.5193	1	01-04/11/2022	PSC	In	An.gambiae	FF	Goat and Dog	Neg	Neg
01200201	6.90658	37.5198	1	01-04/11/2022	PSC	In	An.gambiae	FF	Goat and Human	Neg	Neg
01010101	6.93154	37.53	2	29-03/02/2023	CDC	In	An.gambiae	FF	Goat and Human	Neg	Neg
01010102	6.93154	37.53	2	29-03/02/2023	CDC	In	An.gambiae	FF	Goat and Human	Neg	Neg
01010103	6.93154	37.53	2	29-03/02/2023	CDC	In	An.gambiae	UF		Neg
01010104	6.93154	37.53	2	29-03/02/2023	CDC	In	An.gambiae	FF	Goat and Human	Neg	Neg
01010105	6.93154	37.53	2	29-03/02/2023	CDC	In	An.gambiae	UF		Neg
01010106	6.93154	37.53	2	29-03/02/2023	CDC	In	An.gambiae	UF		Neg
01010107	6.93154	37.53	2	29-03/02/2023	CDC	In	An.gambiae	UF		Neg
01010108	6.93154	37.53	2	29-03/02/2023	CDC	In	An.gambiae	FF	Human	Neg	Neg
01010109	6.93154	37.53	2	29-03/02/2023	CDC	In	An.gambiae	FF	Goat and Human	Neg	Pf
01020101	6.9317	37,530640	2	29-03/02/2023	CDC	In	An.gambiae	UF		Neg
01020102	6.9317	37,530640	2	29-03/02/2023	CDC	In	An.gambiae	UF		Neg
01020103	6.9317	37,530640	2	29-03/02/2023	CDC	Out	An.gambiae	FF	Goat	Neg	Neg
01020104	6.9317	37,530640	2	29-03/02/2023	CDC	Out	An.gambiae	FF	Negative	Neg	Neg
01030101	6,931600	37.5293	2	29-03/02/2023	CDC	In	An.pretoriensis	UF		Neg
01030102	6,931600	37.5293	2	29-03/02/2023	CDC	Out	An.gambiae	UF		Neg
01030103	6,931600	37.5293	2	29-03/02/2023	CDC	Out	An.gambiae	FF	Goat and Dog	Neg	Neg
01030104	6,931600	37.5293	2	29-03/02/2023	CDC	Out	An.gambiae	UF		Neg
01030105	6,931600	37.5293	2	29-03/02/2023	CDC	Out	An.gambiae	FF	Goat and Dog	Neg	Neg
01030106	6,931600	37.5293	2	29-03/02/2023	CDC	Out	An.pretoriensis	UF		Neg
01030107	6,931600	37.5293	2	29-03/02/2023	CDC	Out	An.pretoriensis	UF		Neg
01040101	6.9317	37,532580	2	29-03/02/2023	CDC	In	An.gambiae	UF		Neg
01040102	6.9317	37,532580	2	29-03/02/2023	CDC	In	An.gambiae	UF		Neg
01040103	6.9317	37,532580	2	29-03/02/2023	CDC	In	An.gambiae	UF		Neg
01040104	6.9317	37,532580	2	29-03/02/2023	CDC	In	An.gambiae	UF		Neg
01040105	6.9317	37,532580	2	29-03/02/2023	CDC	In	An.gambiae	UF		Neg
01040106	6.9317	37,532580	2	29-03/02/2023	CDC	In	An.pretoriensis	UF		Neg
01040107	6.9317	37,532580	2	29-03/02/2023	CDC	In	An.pretoriensis	UF		Neg
01040108	6.9317	37,532580	2	29-03/02/2023	CDC	In	An.gambiae	UF		Pf
01040109	6.9317	37,532580	2	29-03/02/2023	CDC	Out	An.pretoriensis	UF		Neg
01040110	6.9317	37,532580	2	29-03/02/2023	CDC	Out	An.pretoriensis	UF		Neg
01040111	6.9317	37,532580	2	29-03/02/2023	CDC	Out	An.pretoriensis	UF		Neg
01040112	6.9317	37,532580	2	29-03/02/2023	CDC	Out	An.pretoriensis	UF		Neg
01040113	6.9317	37,532580	2	29-03/02/2023	CDC	Out	An.pretoriensis	UF		Neg
01040114	6.9317	37,532580	2	29-03/02/2023	CDC	Out	An.pretoriensis	UF		Neg
01040115	6.9317	37,532580	2	29-03/02/2023	CDC	Out	An.pretoriensis	UF		Neg
01040116	6.9317	37,532580	2	29-03/02/2023	CDC	Out	An.pretoriensis	UF		Neg
01040117	6.9317	37,532580	2	29-03/02/2023	CDC	Out	An.pretoriensis	FF	Goat and Dog	Neg	Neg
01050101	6.9323	37.5328	2	29-03/02/2023	CDC	In	An.gambiae	UF		Neg
01050102	6.9323	37.5328	2	29-03/02/2023	CDC	In	An.gambiae	UF		Neg
01050103	6.9323	37.5328	2	29-03/02/2023	CDC	In	An.gambiae	UF		Neg
01050104	6.9323	37.5328	2	29-03/02/2023	CDC	In	An.gambiae	UF		Neg
01050105	6.9323	37.5328	2	29-03/02/2023	CDC	In	An.gambiae	FF	Dog	Neg	Neg
01050106	6.9323	37.5328	2	29-03/02/2023	CDC	In	An.gambiae	FF	Goat and Dog	Neg	Neg
01050107	6.9323	37.5328	2	29-03/02/2023	CDC	In	An.gambiae	FF	Goat and Dog	Neg	Neg
01050108	6.9323	37.5328	2	29-03/02/2023	CDC	In	An.gambiae	FF	Goat and Human	Neg	Pf
01050109	6.9323	37.5328	2	29-03/02/2023	CDC	In	An.gambiae	FF	Negative	Neg	Neg
01100101	6.90878	37.5145	2	29-03/02/2023	CDC	In	An.gambiae	UF		Neg
01100102	6.90878	37.5145	2	29-03/02/2023	CDC	In	An.gambiae	UF		Neg
01100103	6.90878	37.5145	2	29-03/02/2023	CDC	In	An.gambiae	FF	Goat and Human	Neg	Neg
01100104	6.90878	37.5145	2	29-03/02/2023	CDC	In	An.gambiae	FF	Goat and Human	Neg	Neg
01110101	6.90931	37.5151	2	29-03/02/2023	CDC	In	An.gambiae	UF		Neg
01110102	6.90931	37.5151	2	29-03/02/2023	CDC	In	An.gambiae	UF		Neg
01110103	6.90931	37.5151	2	29-03/02/2023	CDC	In	An.gambiae	UF		Neg
01110104	6.90931	37.5151	2	29-03/02/2023	CDC	In	An.gambiae	UF		Neg
01110105	6.90931	37.5151	2	29-03/02/2023	CDC	In	An.gambiae	UF		Neg
01110106	6.90931	37.5151	2	29-03/02/2023	CDC	In	An.gambiae	UF		Neg
01110107	6.90931	37.5151	2	29-03/02/2023	CDC	In	An.gambiae	UF		Neg
01110108	6.90931	37.5151	2	29-03/02/2023	CDC	In	An.gambiae	UF		Neg
01110109	6.90931	37.5151	2	29-03/02/2023	CDC	In	An.gambiae	UF		Neg
01110110	6.90931	37.5151	2	29-03/02/2023	CDC	In	An.gambiae	UF		Neg
01110111	6.90931	37.5151	2	29-03/02/2023	CDC	In	An.gambiae	UF		Neg
01110112	6.90931	37.5151	2	29-03/02/2023	CDC	In	An.gambiae	UF		Neg
01110113	6.90931	37.5151	2	29-03/02/2023	CDC	In	An.gambiae	UF		Neg
01110114	6.90931	37.5151	2	29-03/02/2023	CDC	In	An.gambiae	UF		Neg
01110115	6.90931	37.5151	2	29-03/02/2023	CDC	In	An.gambiae	UF		Neg
01110116	6.90931	37.5151	2	29-03/02/2023	CDC	In	An.gambiae	UF		Neg
01110117	6.90931	37.5151	2	29-03/02/2023	CDC	In	An.gambiae	UF		Neg
01110118	6.90931	37.5151	2	29-03/02/2023	CDC	In	An.gambiae	UF		Neg
01110119	6.90931	37.5151	2	29-03/02/2023	CDC	In	An.gambiae	UF		Neg
01110120	6.90931	37.5151	2	29-03/02/2023	CDC	In	An.gambiae	UF		Neg
01110121	6.90931	37.5151	2	29-03/02/2023	CDC	In	An.gambiae	UF		Neg
01110122	6.90931	37.5151	2	29-03/02/2023	CDC	In	An.gambiae	UF		Neg
01110123	6.90931	37.5151	2	29-03/02/2023	CDC	In	An.gambiae	UF		Neg
01110124	6.90931	37.5151	2	29-03/02/2023	CDC	In	An.gambiae	UF		Neg
01110125	6.90931	37.5151	2	29-03/02/2023	CDC	In	An.gambiae	UF		Neg
01110126	6.90931	37.5151	2	29-03/02/2023	CDC	In	An.gambiae	UF		Neg
01110127	6.90931	37.5151	2	29-03/02/2023	CDC	In	An.gambiae	UF		Neg
01110128	6.90931	37.5151	2	29-03/02/2023	CDC	In	An.gambiae	UF		Neg
01110129	6.90931	37.5151	2	29-03/02/2023	CDC	In	An.gambiae	UF		Neg
01110130	6.90931	37.5151	2	29-03/02/2023	CDC	In	An.gambiae	UF		Neg
01110131	6.90931	37.5151	2	29-03/02/2023	CDC	In	An.gambiae	UF		Neg
01110132	6.90931	37.5151	2	29-03/02/2023	CDC	In	An.gambiae	UF		Neg
01110133	6.90931	37.5151	2	29-03/02/2023	CDC	In	An.gambiae	UF		Neg
01110134	6.90931	37.5151	2	29-03/02/2023	CDC	In	An.gambiae	UF		Neg
01110135	6.90931	37.5151	2	29-03/02/2023	CDC	In	An.gambiae	UF		Neg
01110136	6.90931	37.5151	2	29-03/02/2023	CDC	In	An.gambiae	UF		Neg
01110137	6.90931	37.5151	2	29-03/02/2023	CDC	In	An.gambiae	UF		Neg
01110138	6.90931	37.5151	2	29-03/02/2023	CDC	In	An.gambiae	UF		Neg
01110139	6.90931	37.5151	2	29-03/02/2023	CDC	In	An.gambiae	UF		Neg
01110140	6.90931	37.5151	2	29-03/02/2023	CDC	In	An.gambiae	UF		Neg
01110141	6.90931	37.5151	2	29-03/02/2023	CDC	In	An.gambiae	UF		Neg
01110142	6.90931	37.5151	2	29-03/02/2023	CDC	In	An.gambiae	UF		Neg
01110143	6.90931	37.5151	2	29-03/02/2023	CDC	In	An.gambiae	UF		Neg
01110144	6.90931	37.5151	2	29-03/02/2023	CDC	In	An.gambiae	UF		Neg
01110145	6.90931	37.5151	2	29-03/02/2023	CDC	In	An.gambiae	UF		Neg
01110146	6.90931	37.5151	2	29-03/02/2023	CDC	In	An.gambiae	UF		Neg
01110147	6.90931	37.5151	2	29-03/02/2023	CDC	In	An.gambiae	UF		Neg
01110148	6.90931	37.5151	2	29-03/02/2023	CDC	In	An.gambiae	UF		Neg
01110149	6.90931	37.5151	2	29-03/02/2023	CDC	In	An.gambiae	UF		Neg
01110150	6.90931	37.5151	2	29-03/02/2023	CDC	In	An.gambiae	UF		Neg
01110151	6.90931	37.5151	2	29-03/02/2023	CDC	In	An.gambiae	UF		Neg
01110152	6.90931	37.5151	2	29-03/02/2023	CDC	In	An.gambiae	UF		Neg
01110153	6.90931	37.5151	2	29-03/02/2023	CDC	In	An.gambiae	UF		Neg
01110154	6.90931	37.5151	2	29-03/02/2023	CDC	In	An.gambiae	UF		Neg
01110155	6.90931	37.5151	2	29-03/02/2023	CDC	In	An.gambiae	UF		Neg
01110156	6.90931	37.5151	2	29-03/02/2023	CDC	In	An.gambiae	UF		Neg
01110157	6.90931	37.5151	2	29-03/02/2023	CDC	In	An.gambiae	UF		Neg
01110158	6.90931	37.5151	2	29-03/02/2023	CDC	In	An.gambiae	UF		Neg
01110159	6.90931	37.5151	2	29-03/02/2023	CDC	In	An.gambiae	UF		Neg
01110160	6.90931	37.5151	2	29-03/02/2023	CDC	In	An.gambiae	UF		Neg
01110161	6.90931	37.5151	2	29-03/02/2023	CDC	In	An.gambiae	UF		Neg
01110162	6.90931	37.5151	2	29-03/02/2023	CDC	In	An.gambiae	FF	Goat and Human	Neg	Neg
01110163	6.90931	37.5151	2	29-03/02/2023	CDC	In	An.gambiae	HG	Goat and Human	Neg	Neg
01110164	6.90931	37.5151	2	29-03/02/2023	CDC	In	An.gambiae	HG	Goat and Human	Neg	Neg
01110165	6.90931	37.5151	2	29-03/02/2023	CDC	In	An.gambiae	UF		Neg
01110166	6.90931	37.5151	2	29-03/02/2023	CDC	In	An.gambiae	FF	Goat and Dog	Neg	Neg
01110167	6.90931	37.5151	2	29-03/02/2023	CDC	In	An.gambiae	UF		Neg
01110168	6.90931	37.5151	2	29-03/02/2023	CDC	Out	An.gambiae	UF		Neg
01110169	6.90931	37.5151	2	29-03/02/2023	CDC	Out	An.gambiae	UF		Neg
01110170	6.90931	37.5151	2	29-03/02/2023	CDC	Out	An.gambiae	UF		Neg
01110171	6.90931	37.5151	2	29-03/02/2023	CDC	Out	An.gambiae	UF		Neg
01120101	6.90877	37.5153	2	29-03/02/2023	CDC	In	An.gambiae	UF		Neg
01120102	6.90877	37.5153	2	29-03/02/2023	CDC	In	An.gambiae	UF		Neg
01120103	6.90877	37.5153	2	29-03/02/2023	CDC	In	An.gambiae	UF		Neg
01120104	6.90877	37.5153	2	29-03/02/2023	CDC	In	An.gambiae	UF		Neg
01120105	6.90877	37.5153	2	29-03/02/2023	CDC	In	An.gambiae	UF		Neg
01120106	6.90877	37.5153	2	29-03/02/2023	CDC	In	An.gambiae	UF		Neg
01120107	6.90877	37.5153	2	29-03/02/2023	CDC	In	An.gambiae	FF	Goat	Neg	Neg
01120108	6.90877	37.5153	2	29-03/02/2023	CDC	In	An.gambiae	UF		Neg
01120109	6.90877	37.5153	2	29-03/02/2023	CDC	In	An.gambiae	UF		Neg
01120110	6.90877	37.5153	2	29-03/02/2023	CDC	In	An.gambiae	UF		Neg
01120111	6.90877	37.5153	2	29-03/02/2023	CDC	In	An.gambiae	UF		Neg
01120112	6.90877	37.5153	2	29-03/02/2023	CDC	In	An.gambiae	UF		Neg
01120113	6.90877	37.5153	2	29-03/02/2023	CDC	In	An.gambiae	FF	Goat and Human	Neg	Neg
01120114	6.90877	37.5153	2	29-03/02/2023	CDC	In	An.gambiae	FF	Goat	Neg	Neg
01120115	6.90877	37.5153	2	29-03/02/2023	CDC	In	An.gambiae	FF	Negative	Neg	Neg
01120116	6.90877	37.5153	2	29-03/02/2023	CDC	In	An.gambiae	FF	Goat and Human	Neg	Neg
01120117	6.90877	37.5153	2	29-03/02/2023	CDC	In	An.gambiae	FF	Goat	Neg	Neg
01120118	6.90877	37.5153	2	29-03/02/2023	CDC	In	An.gambiae	FF	Goat and Human	Neg	Neg
01120119	6.90877	37.5153	2	29-03/02/2023	CDC	In	An.gambiae	FF	Goat and Human	Neg	Neg
01120120	6.90877	37.5153	2	29-03/02/2023	CDC	In	An.gambiae	FF	Goat and Human	Neg	Neg
01120121	6.90877	37.5153	2	29-03/02/2023	CDC	In	An.gambiae	UF		Neg
01120122	6.90877	37.5153	2	29-03/02/2023	CDC	In	An.gambiae	FF	Goat	Neg	Neg
01120123	6.90877	37.5153	2	29-03/02/2023	CDC	Out	An.gambiae	UF		Neg
01120124	6.90877	37.5153	2	29-03/02/2023	CDC	Out	An.gambiae	UF		Neg
01120125	6.90877	37.5153	2	29-03/02/2023	CDC	Out	An.gambiae	UF		Pv-210
01120126	6.90877	37.5153	2	29-03/02/2023	CDC	Out	An.gambiae	UF		Neg
01120127	6.90877	37.5153	2	29-03/02/2023	CDC	Out	An.gambiae	UF		Neg
01120128	6.90877	37.5153	2	29-03/02/2023	CDC	Out	An.gambiae	UF		Neg
01120129	6.90877	37.5153	2	29-03/02/2023	CDC	Out	An.gambiae	UF		Neg
01120130	6.90877	37.5153	2	29-03/02/2023	CDC	Out	An.gambiae	UF		Neg
01120131	6.90877	37.5153	2	29-03/02/2023	CDC	Out	An.gambiae	UF		Neg
01120132	6.90877	37.5153	2	29-03/02/2023	CDC	Out	An.gambiae	UF		Neg
01120133	6.90877	37.5153	2	29-03/02/2023	CDC	Out	An.gambiae	UF		Neg
01120134	6.90877	37.5153	2	29-03/02/2023	CDC	Out	An.gambiae	UF		Neg
01120135	6.90877	37.5153	2	29-03/02/2023	CDC	Out	An.gambiae	UF		Neg
01120136	6.90877	37.5153	2	29-03/02/2023	CDC	Out	An.gambiae	UF		Neg
01120137	6.90877	37.5153	2	29-03/02/2023	CDC	Out	An.gambiae	UF		Neg
01120138	6.90877	37.5153	2	29-03/02/2023	CDC	Out	An.gambiae	UF		Neg
01120139	6.90877	37.5153	2	29-03/02/2023	CDC	Out	An.gambiae	UF		Neg
01120140	6.90877	37.5153	2	29-03/02/2023	CDC	Out	An.pretoriensis	UF		Neg
01120141	6.90877	37.5153	2	29-03/02/2023	CDC	Out	An.pretoriensis	UF		Neg
01120142	6.90877	37.5153	2	29-03/02/2023	CDC	Out	An.pretoriensis	UF		Neg
01120143	6.90877	37.5153	2	29-03/02/2023	CDC	Out	An.pretoriensis	UF		Neg
01120144	6.90877	37.5153	2	29-03/02/2023	CDC	Out	An.gambiae	UF		Neg
01130101	6.90944	37.5142	2	29-03/02/2023	CDC	In	An.gambiae	UF		Neg
01130102	6.90944	37.5142	2	29-03/02/2023	CDC	In	An.gambiae	UF		Neg
01130103	6.90944	37.5142	2	29-03/02/2023	CDC	In	An.gambiae	UF		Neg
01130104	6.90944	37.5142	2	29-03/02/2023	CDC	In	An.gambiae	UF		Neg
01130105	6.90944	37.5142	2	29-03/02/2023	CDC	In	An.gambiae	HG	Goat	Neg	Neg
01130106	6.90944	37.5142	2	29-03/02/2023	CDC	In	An.gambiae	HG	Negative	Neg	Neg
01130107	6.90944	37.5142	2	29-03/02/2023	CDC	In	An.gambiae	UF		Neg
01130108	6.90944	37.5142	2	29-03/02/2023	CDC	In	An.gambiae	UF		Neg
01130109	6.90944	37.5142	2	29-03/02/2023	CDC	In	An.gambiae	FF	Negative	Neg	Neg
01130110	6.90944	37.5142	2	29-03/02/2023	CDC	In	An.gambiae	UF		Neg
01130111	6.90944	37.5142	2	29-03/02/2023	CDC	In	An.gambiae	HG	Pig and Sheep	Neg	Neg
01130112	6.90944	37.5142	2	29-03/02/2023	CDC	In	An.gambiae	UF		Neg
01130113	6.90944	37.5142	2	29-03/02/2023	CDC	In	An.gambiae	FF	Goat	Neg	Neg
01130114	6.90944	37.5142	2	29-03/02/2023	CDC	In	An.gambiae	UF		Neg
01130115	6.90944	37.5142	2	29-03/02/2023	CDC	In	An.gambiae	FF	Goat and Dog	Neg	Neg
01130116	6.90944	37.5142	2	29-03/02/2023	CDC	In	An.gambiae	FF	Goat	Neg	Neg
01130117	6.90944	37.5142	2	29-03/02/2023	CDC	In	An.gambiae	FF	Negative	Neg	Neg
01130118	6.90944	37.5142	2	29-03/02/2023	CDC	In	An.gambiae	FF	Goat	Neg	Neg
01130119	6.90944	37.5142	2	29-03/02/2023	CDC	In	An.gambiae	UF		Neg
01130120	6.90944	37.5142	2	29-03/02/2023	CDC	In	An.gambiae	UF		Neg
01130121	6.90944	37.5142	2	29-03/02/2023	CDC	In	An.gambiae	HG	Negative	Neg	Neg
01130122	6.90944	37.5142	2	29-03/02/2023	CDC	In	An.gambiae	FF	Negative	Neg	Neg
01130123	6.90944	37.5142	2	29-03/02/2023	CDC	In	An.gambiae	UF		Neg
01130124	6.90944	37.5142	2	29-03/02/2023	CDC	In	An.gambiae	FF	Goat	Neg	Neg
01130125	6.90944	37.5142	2	29-03/02/2023	CDC	In	An.gambiae	UF		Neg
01130126	6.90944	37.5142	2	29-03/02/2023	CDC	In	An.gambiae	UF		Neg
01130127	6.90944	37.5142	2	29-03/02/2023	CDC	In	An.gambiae	FF	Goat and Human	Neg	Neg
01130128	6.90944	37.5142	2	29-03/02/2023	CDC	In	An.gambiae	FF	Goat and Human	Neg	Neg
01130129	6.90944	37.5142	2	29-03/02/2023	CDC	In	An.gambiae	FF	Goat and Human	Neg	Pf+Pv
01130130	6.90944	37.5142	2	29-03/02/2023	CDC	In	An.gambiae	UF		Neg
01130131	6.90944	37.5142	2	29-03/02/2023	CDC	In	An.gambiae	UF		Neg
01130132	6.90944	37.5142	2	29-03/02/2023	CDC	In	An.gambiae	FF	Goat and Human	Neg	Pf+Pv
01130133	6.90944	37.5142	2	29-03/02/2023	CDC	In	An.gambiae	FF	Goat	Neg	Neg
01130134	6.90944	37.5142	2	29-03/02/2023	CDC	In	An.gambiae	FF	Goat	Neg	Neg
01130135	6.90944	37.5142	2	29-03/02/2023	CDC	In	An.gambiae	UF		Neg
01130136	6.90944	37.5142	2	29-03/02/2023	CDC	In	An.gambiae	FF	Goat	Neg	Neg
01130137	6.90944	37.5142	2	29-03/02/2023	CDC	In	An.gambiae	UF		Neg
01130138	6.90944	37.5142	2	29-03/02/2023	CDC	In	An.gambiae	FF	Human	Neg	Neg
01130139	6.90944	37.5142	2	29-03/02/2023	CDC	In	An.gambiae	FF	Human	Neg	Neg
01130140	6.90944	37.5142	2	29-03/02/2023	CDC	In	An.gambiae	FF	Goat	Neg	Neg
01130141	6.90944	37.5142	2	29-03/02/2023	CDC	In	An.gambiae	FF	Goat, Human and Cow	Neg	Pf+Pv
01130142	6.90944	37.5142	2	29-03/02/2023	CDC	In	An.gambiae	UF		Neg
01130143	6.90944	37.5142	2	29-03/02/2023	CDC	In	An.gambiae	UF		Neg
01130144	6.90944	37.5142	2	29-03/02/2023	CDC	In	An.gambiae	FF	Negative	Neg	Neg
01130145	6.90944	37.5142	2	29-03/02/2023	CDC	In	An.gambiae	FF	Goat	Neg	Neg
01130146	6.90944	37.5142	2	29-03/02/2023	CDC	In	An.gambiae	FF	Goat	Neg	Neg
01130147	6.90944	37.5142	2	29-03/02/2023	CDC	In	An.gambiae	FF	Goat and Human	Neg	Pf+Pv
01130148	6.90944	37.5142	2	29-03/02/2023	CDC	In	An.gambiae	FF	Goat and Human	Neg	Neg
01130149	6.90944	37.5142	2	29-03/02/2023	CDC	In	An.gambiae	UF		Neg
01130150	6.90944	37.5142	2	29-03/02/2023	CDC	In	An.gambiae	UF		Neg
01130151	6.90944	37.5142	2	29-03/02/2023	CDC	In	An.gambiae	UF		Neg
01130152	6.90944	37.5142	2	29-03/02/2023	CDC	In	An.gambiae	FF	Goat and Human	Pv-210	Pf+Pv
01130153	6.90944	37.5142	2	29-03/02/2023	CDC	In	An.gambiae	UF		Neg
01130154	6.90944	37.5142	2	29-03/02/2023	CDC	In	An.gambiae	FF	Human	Neg	Neg
01130155	6.90944	37.5142	2	29-03/02/2023	CDC	In	An.gambiae	FF	Goat	Neg	Neg
01130156	6.90944	37.5142	2	29-03/02/2023	CDC	In	An.gambiae	FF	Goat and Human	Neg	Pf
01130157	6.90944	37.5142	2	29-03/02/2023	CDC	In	An.gambiae	UF		Neg
01130158	6.90944	37.5142	2	29-03/02/2023	CDC	In	An.gambiae	UF		Neg
01130159	6.90944	37.5142	2	29-03/02/2023	CDC	In	An.gambiae	UF		Neg
01130160	6.90944	37.5142	2	29-03/02/2023	CDC	In	An.gambiae	FF	Goat and Human	Neg	Neg
01130161	6.90944	37.5142	2	29-03/02/2023	CDC	In	An.gambiae	HG	Goat and Human	Neg	Neg
01130162	6.90944	37.5142	2	29-03/02/2023	CDC	In	An.gambiae	FF	Human	Neg	Neg
01130163	6.90944	37.5142	2	29-03/02/2023	CDC	In	An.gambiae	FF	Human	Neg	Neg
01130164	6.90944	37.5142	2	29-03/02/2023	CDC	In	An.gambiae	FF	Goat	Neg	Neg
01130165	6.90944	37.5142	2	29-03/02/2023	CDC	In	An.gambiae	FF	Goat and Human	Neg	Neg
01130166	6.90944	37.5142	2	29-03/02/2023	CDC	In	An.gambiae	FF	Human	Neg	Neg
01130167	6.90944	37.5142	2	29-03/02/2023	CDC	In	An.gambiae	HG	Dog	Neg	Neg
01130168	6.90944	37.5142	2	29-03/02/2023	CDC	In	An.gambiae	FF	Human	Neg	Pf
01130169	6.90944	37.5142	2	29-03/02/2023	CDC	In	An.gambiae	FF	Goat	Neg	Neg
01130170	6.90944	37.5142	2	29-03/02/2023	CDC	In	An.gambiae	UF		Neg
01130171	6.90944	37.5142	2	29-03/02/2023	CDC	In	An.gambiae	HG	Goat and Human	Neg	Neg
01130172	6.90944	37.5142	2	29-03/02/2023	CDC	In	An.gambiae	FF	Goat and Human	Neg	Pf
01130173	6.90944	37.5142	2	29-03/02/2023	CDC	In	An.gambiae	UF		Neg
01130174	6.90944	37.5142	2	29-03/02/2023	CDC	In	An.gambiae	UF		Neg
01130175	6.90944	37.5142	2	29-03/02/2023	CDC	In	An.gambiae	UF		Neg
01130176	6.90944	37.5142	2	29-03/02/2023	CDC	In	An.gambiae	FF	Goat and Human	Neg	Pf
01130177	6.90944	37.5142	2	29-03/02/2023	CDC	In	An.gambiae	FF	Goat and Human	Neg	Neg
01130178	6.90944	37.5142	2	29-03/02/2023	CDC	In	An.gambiae	FF	Goat	Neg	Neg
01130179	6.90944	37.5142	2	29-03/02/2023	CDC	In	An.gambiae	HG	Goat	Neg	Neg
01130180	6.90944	37.5142	2	29-03/02/2023	CDC	In	An.gambiae	FF	Negative	Neg	Neg
01130181	6.90944	37.5142	2	29-03/02/2023	CDC	In	An.gambiae	UF		Neg
01130182	6.90944	37.5142	2	29-03/02/2023	CDC	In	An.gambiae	UF		Neg
01130183	6.90944	37.5142	2	29-03/02/2023	CDC	In	An.gambiae	UF		Neg
01130184	6.90944	37.5142	2	29-03/02/2023	CDC	In	An.gambiae	UF		Neg
01130185	6.90944	37.5142	2	29-03/02/2023	CDC	In	An.gambiae	UF		Neg
01130186	6.90944	37.5142	2	29-03/02/2023	CDC	In	An.gambiae	UF		Neg
01130187	6.90944	37.5142	2	29-03/02/2023	CDC	In	An.gambiae	UF		Neg
01130188	6.90944	37.5142	2	29-03/02/2023	CDC	In	An.gambiae	UF		Neg
01130189	6.90944	37.5142	2	29-03/02/2023	CDC	In	An.gambiae	UF		Neg
01130190	6.90944	37.5142	2	29-03/02/2023	CDC	In	An.gambiae	UF		Neg
01130191	6.90944	37.5142	2	29-03/02/2023	CDC	In	An.gambiae	HG	Goat and Human	Neg	Neg
01130192	6.90944	37.5142	2	29-03/02/2023	CDC	In	An.gambiae	UF		Neg
01130193	6.90944	37.5142	2	29-03/02/2023	CDC	In	An.gambiae	UF		Neg
01130194	6.90944	37.5142	2	29-03/02/2023	CDC	In	An.gambiae	UF		Neg
01130195	6.90944	37.5142	2	29-03/02/2023	CDC	In	An.gambiae	UF		Neg
01130196	6.90944	37.5142	2	29-03/02/2023	CDC	In	An.gambiae	UF		Neg
01130197	6.90944	37.5142	2	29-03/02/2023	CDC	In	An.gambiae	FF	Goat	Neg	Neg
01130198	6.90944	37.5142	2	29-03/02/2023	CDC	In	An.gambiae	UF		Neg
01130199	6.90944	37.5142	2	29-03/02/2023	CDC	In	An.gambiae	UF		Neg
011301100	6.90944	37.5142	2	29-03/02/2023	CDC	In	An.gambiae	UF		Neg
011301101	6.90944	37.5142	2	29-03/02/2023	CDC	In	An.gambiae	HG	Goat and Human	Neg	Pf
011301102	6.90944	37.5142	2	29-03/02/2023	CDC	In	An.gambiae	UF		Neg
011301103	6.90944	37.5142	2	29-03/02/2023	CDC	In	An.gambiae	UF		Neg
011301104	6.90944	37.5142	2	29-03/02/2023	CDC	In	An.gambiae	UF		Neg
011301105	6.90944	37.5142	2	29-03/02/2023	CDC	In	An.gambiae	UF		Neg
011301106	6.90944	37.5142	2	29-03/02/2023	CDC	In	An.gambiae	UF		Neg
011301107	6.90944	37.5142	2	29-03/02/2023	CDC	In	An.gambiae	UF		Neg
011301108	6.90944	37.5142	2	29-03/02/2023	CDC	In	An.gambiae	UF		Neg
011301109	6.90944	37.5142	2	29-03/02/2023	CDC	In	An.gambiae	UF		Neg
011301110	6.90944	37.5142	2	29-03/02/2023	CDC	In	An.gambiae	UF		Neg
011301111	6.90944	37.5142	2	29-03/02/2023	CDC	In	An.gambiae	UF		Neg
011301112	6.90944	37.5142	2	29-03/02/2023	CDC	In	An.gambiae	UF		Neg
011301113	6.90944	37.5142	2	29-03/02/2023	CDC	In	An.gambiae	UF		Neg
011301114	6.90944	37.5142	2	29-03/02/2023	CDC	In	An.gambiae	UF		Neg
011301115	6.90944	37.5142	2	29-03/02/2023	CDC	In	An.gambiae	UF		Neg
011301116	6.90944	37.5142	2	29-03/02/2023	CDC	In	An.gambiae	UF		Neg
011301117	6.90944	37.5142	2	29-03/02/2023	CDC	In	An.gambiae	UF		Neg
011301118	6.90944	37.5142	2	29-03/02/2023	CDC	In	An.gambiae	UF		Neg
011301119	6.90944	37.5142	2	29-03/02/2023	CDC	In	An.gambiae	UF		Neg
011301120	6.90944	37.5142	2	29-03/02/2023	CDC	In	An.gambiae	UF		Neg
011301121	6.90944	37.5142	2	29-03/02/2023	CDC	In	An.gambiae	UF		Neg
011301122	6.90944	37.5142	2	29-03/02/2023	CDC	In	An.gambiae	UF		Neg
011301123	6.90944	37.5142	2	29-03/02/2023	CDC	In	An.gambiae	UF		Neg
011301124	6.90944	37.5142	2	29-03/02/2023	CDC	In	An.gambiae	UF		Neg
011301125	6.90944	37.5142	2	29-03/02/2023	CDC	In	An.gambiae	UF		Neg
011301126	6.90944	37.5142	2	29-03/02/2023	CDC	In	An.gambiae	UF		Neg
011301127	6.90944	37.5142	2	29-03/02/2023	CDC	In	An.gambiae	FF	Human	Neg	Neg
011301128	6.90944	37.5142	2	29-03/02/2023	CDC	Out	An.gambiae	UF		Neg
01140101	6,907640	37,517630	2	29-03/02/2023	CDC	In	An.gambiae	UF		Neg
01140102	6,907640	37,517630	2	29-03/02/2023	CDC	In	An.gambiae	UF		Neg
01140103	6,907640	37,517630	2	29-03/02/2023	CDC	In	An.gambiae	FF	Human	Neg	Neg
01140104	6,907640	37,517630	2	29-03/02/2023	CDC	In	An.gambiae	UF		Neg
01140105	6,907640	37,517630	2	29-03/02/2023	CDC	In	An.gambiae	UF		Neg
01140106	6,907640	37,517630	2	29-03/02/2023	CDC	In	An.gambiae	UF		Neg
01140107	6,907640	37,517630	2	29-03/02/2023	CDC	In	An.gambiae	UF		Neg
01140108	6,907640	37,517630	2	29-03/02/2023	CDC	In	An.gambiae	UF		Neg
01140109	6,907640	37,517630	2	29-03/02/2023	CDC	In	An.gambiae	UF		Neg
01140110	6,907640	37,517630	2	29-03/02/2023	CDC	In	An.gambiae	UF		Neg
01140111	6,907640	37,517630	2	29-03/02/2023	CDC	In	An.gambiae	UF		Neg
01140112	6,907640	37,517630	2	29-03/02/2023	CDC	In	An.gambiae	UF		Neg
01140113	6,907640	37,517630	2	29-03/02/2023	CDC	In	An.gambiae	UF		Neg
01140114	6,907640	37,517630	2	29-03/02/2023	CDC	In	An.gambiae	UF		Neg
01140115	6,907640	37,517630	2	29-03/02/2023	CDC	In	An.gambiae	UF		Neg
01140116	6,907640	37,517630	2	29-03/02/2023	CDC	In	An.gambiae	UF		Neg
01140117	6,907640	37,517630	2	29-03/02/2023	CDC	In	An.pretoriensis	UF		Neg
01140118	6,907640	37,517630	2	29-03/02/2023	CDC	In	An.gambiae	FF	Goat and Human	Neg	Neg
01150201	6,908300	37.5174	2	29-03/02/2023	PSC	In	An.gambiae	FF	Goat and Human	Neg	Neg
01150202	6,908300	37.5174	2	29-03/02/2023	PSC	In	An.gambiae	FF	Goat	Neg	Neg
01150203	6,908300	37.5174	2	29-03/02/2023	PSC	In	An.gambiae	FF	Goat, Human and Cow	Neg	Neg
01150204	6,908300	37.5174	2	29-03/02/2023	PSC	In	An.gambiae	FF	Goat and Human	Neg	Neg
01150205	6,908300	37.5174	2	29-03/02/2023	PSC	In	An.gambiae	FF	Negative	Neg	Neg
01160201	6.90795	37.5169	2	29-03/02/2023	PSC	In	An.gambiae	FF	Goat and Human	Neg	Neg
01160202	6.90795	37.5169	2	29-03/02/2023	PSC	In	An.gambiae	FF	Goat and Human	Neg	Neg
01160203	6.90795	37.5169	2	29-03/02/2023	PSC	In	An.gambiae	FF	Goat and Human	Neg	Pf+Pv
01160204	6.90795	37.5169	2	29-03/02/2023	PSC	In	An.gambiae	FF	Goat and Human	Neg	Neg
01170201	6.90763	37.5167	2	29-03/02/2023	PSC	In	An.gambiae	FF	Goat, Human and Cow	Neg	Neg
01170202	6.90763	37.5167	2	29-03/02/2023	PSC	In	An.gambiae	FF	Goat and Human	Neg	Neg
01170203	6.90763	37.5167	2	29-03/02/2023	PSC	In	An.gambiae	FF	Cow	Neg	Neg
01170204	6.90763	37.5167	2	29-03/02/2023	PSC	In	An.gambiae	FF	Cow	Neg	Neg
01170205	6.90763	37.5167	2	29-03/02/2023	PSC	In	An.gambiae	HG	Negative	Neg	Neg
01190201	6.90681	37.5193	2	29-03/02/2023	PSC	In	An.gambiae	FF	Goat and Cow	Neg	Neg
01190202	6.90681	37.5193	2	29-03/02/2023	PSC	In	An.gambiae	FF	Goat and Cow	Neg	Neg
01190203	6.90681	37.5193	2	29-03/02/2023	PSC	In	An.gambiae	UF		Neg
01190204	6.90681	37.5193	2	29-03/02/2023	PSC	In	An.gambiae	UF		Neg
01190205	6.90681	37.5193	2	29-03/02/2023	PSC	In	An.gambiae	FF	Goat	Neg	Neg
01010101	6.93154	37.53	3	30-03/04/2023	CDC	In	An.gambiae	UF		Neg
01010102	6.93154	37.53	3	30-03/04/2023	CDC	In	An.gambiae	UF		Neg
01010103	6.93154	37.53	3	30-03/04/2023	CDC	In	An.gambiae	UF		Neg
01010104	6.93154	37.53	3	30-03/04/2023	CDC	In	An.gambiae	UF		Neg
01010105	6.93154	37.53	3	30-03/04/2023	CDC	In	An.gambiae	UF		Neg
01010106	6.93154	37.53	3	30-03/04/2023	CDC	In	An.gambiae	FF	Goat and Human	Neg	Neg
01010107	6.93154	37.53	3	30-03/04/2023	CDC	In	An.gambiae	FF	Goat and Human	Neg	Pf
01010108	6.93154	37.53	3	30-03/04/2023	CDC	In	An.gambiae	FF	Goat, Human and Dog	Neg	Neg
01010109	6.93154	37.53	3	30-03/04/2023	CDC	Out	An.gambiae	FF	Negative	Neg	Neg
01030101	6,931600	37.5293	3	30-03/04/2023	CDC	In	An.gambiae	UF		Neg
01030102	6,931600	37.5293	3	30-03/04/2023	CDC	In	An.gambiae	UF		Neg
01030103	6,931600	37.5293	3	30-03/04/2023	CDC	In	An.gambiae	UF		Neg
01050101	6.9323	37.5328	3	30-03/04/2023	CDC	In	An.gambiae	FF	Human	Neg	Neg
01050102	6.9323	37.5328	3	30-03/04/2023	CDC	Out	An.gambiae	UF		Neg
01080201	6,932220	37.5287	3	30-03/04/2023	PSC	In	An.gambiae	UF		Neg
01080202	6,932220	37.5287	3	30-03/04/2023	PSC	In	An.gambiae	UF		Neg
01090201	6.93158	37.5296	3	30-03/04/2023	PSC	In	An.gambiae	FF	Negative	Neg	Neg
01090202	6.93158	37.5296	3	30-03/04/2023	PSC	In	An.gambiae	FF	Goat	Neg	Neg
01110101	6.90931	37.5151	3	30-03/04/2023	CDC	Out	An.gambiae	UF		Neg
01120101	6.90877	37.5153	3	30-03/04/2023	CDC	Out	An.gambiae	FF	Goat and Human	Neg	Neg
01130101	6.90944	37.5142	3	30-03/04/2023	CDC	In	An.gambiae	UF		Neg
01130102	6.90944	37.5142	3	30-03/04/2023	CDC	In	An.gambiae	UF		Neg
01130103	6.90944	37.5142	3	30-03/04/2023	CDC	In	An.gambiae	UF		Neg
01130104	6.90944	37.5142	3	30-03/04/2023	CDC	In	An.gambiae	HG	Negative	Neg	Neg
01130105	6.90944	37.5142	3	30-03/04/2023	CDC	In	An.gambiae	UF		Neg
01130106	6.90944	37.5142	3	30-03/04/2023	CDC	In	An.gambiae	UF		Neg
01130107	6.90944	37.5142	3	30-03/04/2023	CDC	In	An.gambiae	UF		Neg
01130108	6.90944	37.5142	3	30-03/04/2023	CDC	In	An.gambiae	UF		Neg
01130109	6.90944	37.5142	3	30-03/04/2023	CDC	In	An.gambiae	UF		Neg
01130110	6.90944	37.5142	3	30-03/04/2023	CDC	In	An.gambiae	UF		Neg
01130111	6.90944	37.5142	3	30-03/04/2023	CDC	In	An.gambiae	UF		Neg
01130112	6.90944	37.5142	3	30-03/04/2023	CDC	In	An.gambiae	UF		Neg
01130113	6.90944	37.5142	3	30-03/04/2023	CDC	In	An.gambiae	UF		Neg
01130114	6.90944	37.5142	3	30-03/04/2023	CDC	In	An.gambiae	UF		Neg
01130115	6.90944	37.5142	3	30-03/04/2023	CDC	In	An.gambiae	UF		Neg
01130116	6.90944	37.5142	3	30-03/04/2023	CDC	In	An.gambiae	UF		Neg
01130117	6.90944	37.5142	3	30-03/04/2023	CDC	In	An.gambiae	UF		Neg
01130118	6.90944	37.5142	3	30-03/04/2023	CDC	In	An.gambiae	UF		Pv-210
01130119	6.90944	37.5142	3	30-03/04/2023	CDC	In	An.gambiae	UF		Neg
01130120	6.90944	37.5142	3	30-03/04/2023	CDC	In	An.gambiae	UF		Neg
01130121	6.90944	37.5142	3	30-03/04/2023	CDC	In	An.gambiae	UF		Neg
01130122	6.90944	37.5142	3	30-03/04/2023	CDC	In	An.gambiae	FF	Goat and Human	Neg	Neg
01130123	6.90944	37.5142	3	30-03/04/2023	CDC	In	An.gambiae	UF		Neg
01140101	6,907640	37,517630	3	30-03/04/2023	CDC	In	An.gambiae	FF	Goat and Human	Neg	Pf
01140102	6,907640	37,517630	3	30-03/04/2023	CDC	In	An.gambiae	FF	Goat and Human	Neg	Pf
01140103	6,907640	37,517630	3	30-03/04/2023	CDC	In	An.gambiae	UF		Neg
01140104	6,907640	37,517630	3	30-03/04/2023	CDC	In	An.gambiae	UF		Neg
01140105	6,907640	37,517630	3	30-03/04/2023	CDC	In	An.gambiae	UF		Neg
01150201	6,908300	37.5174	3	30-03/04/2023	PSC	In	An.gambiae	UF		Neg
01150202	6,908300	37.5174	3	30-03/04/2023	PSC	In	An.gambiae	FF	Negative	Neg	Neg
01150203	6,908300	37.5174	3	30-03/04/2023	PSC	In	An.gambiae	FF	Negative	Neg	Pf
01150204	6,908300	37.5174	3	30-03/04/2023	PSC	In	An.gambiae	UF		Neg
01150205	6,908300	37.5174	3	30-03/04/2023	PSC	In	An.gambiae	HG	Goat and Cow	Neg	Neg
01010101	6.93154	37.53	4	01-04/06/2023	CDC	In	An.gambiae	FF	Goat and Cow	Neg	Neg
01010102	6.93154	37.53	4	01-04/06/2023	CDC	In	An.gambiae	UF		Neg
01010103	6.93154	37.53	4	01-04/06/2023	CDC	In	An.gambiae	UF		Neg
01020101	6.9317	37,530640	4	01-04/06/2023	CDC	In	An.gambiae	UF		Neg
01020102	6.9317	37,530640	4	01-04/06/2023	CDC	In	An.gambiae	UF		Neg
01020103	6.9317	37,530640	4	01-04/06/2023	CDC	In	An.gambiae	UF		Neg
01020104	6.9317	37,530640	4	01-04/06/2023	CDC	In	An.gambiae	UF		Neg
01020105	6.9317	37,530640	4	01-04/06/2023	CDC	In	An.gambiae	UF		Neg
01020106	6.9317	37,530640	4	01-04/06/2023	CDC	In	An.gambiae	FF	Goat and Human	Neg	Neg
01020107	6.9317	37,530640	4	01-04/06/2023	CDC	In	An.gambiae	FF	Goat and Cow	Neg	Neg
01020108	6.9317	37,530640	4	01-04/06/2023	CDC	In	An.gambiae	FF	Negative	Neg	Neg
01020109	6.9317	37,530640	4	01-04/06/2023	CDC	In	An.gambiae	FF	Goat and Human	Neg	Pf+Pv
01020110	6.9317	37,530640	4	01-04/06/2023	CDC	In	An.gambiae	FF	Goat and Human	Neg	Pf+Pv
01020111	6.9317	37,530640	4	01-04/06/2023	CDC	In	An.pretoriensis	UF		Neg
01020112	6.9317	37,530640	4	01-04/06/2023	CDC	In	An.gambiae	FF	Goat and Human	Neg	Neg
01020113	6.9317	37,530640	4	01-04/06/2023	CDC	In	An.gambiae	FF	Goat and Human	Neg	Pf+Pv
01020114	6.9317	37,530640	4	01-04/06/2023	CDC	In	An.gambiae	FF	Goat and Human	Neg	Pf
01020115	6.9317	37,530640	4	01-04/06/2023	CDC	In	An.gambiae	FF	Goat and Human	Neg	Pf+Pv
01040101	6.9317	37,532580	4	01-04/06/2023	CDC	In	An.gambiae	FF	Cow	Neg	Neg
01040102	6.9317	37,532580	4	01-04/06/2023	CDC	In	An.gambiae	UF		Neg
01040103	6.9317	37,532580	4	01-04/06/2023	CDC	In	An.gambiae	UF		Neg
01040104	6.9317	37,532580	4	01-04/06/2023	CDC	In	An.gambiae	FF	Goat, Human and Cow	Neg	Neg
01040105	6.9317	37,532580	4	01-04/06/2023	CDC	In	An.gambiae	FF	Negative	Neg	Neg
01040106	6.9317	37,532580	4	01-04/06/2023	CDC	In	An.gambiae	UF		Neg
01040107	6.9317	37,532580	4	01-04/06/2023	CDC	In	An.gambiae	FF	Goat and Cow	Neg	Neg
01040108	6.9317	37,532580	4	01-04/06/2023	CDC	In	An.gambiae	UF		Neg
01040109	6.9317	37,532580	4	01-04/06/2023	CDC	In	An.gambiae	UF		Neg
01050101	6.9323	37.5328	4	01-04/06/2023	CDC	In	An.gambiae	UF		Neg
01050102	6.9323	37.5328	4	01-04/06/2023	CDC	In	An.gambiae	FF	Goat and Cow	Neg	Neg
01050103	6.9323	37.5328	4	01-04/06/2023	CDC	In	An.gambiae	UF		Neg
01050104	6.9323	37.5328	4	01-04/06/2023	CDC	In	An.gambiae	UF		Neg
01050105	6.9323	37.5328	4	01-04/06/2023	CDC	In	An.gambiae	UF		Neg
01050106	6.9323	37.5328	4	01-04/06/2023	CDC	In	An.gambiae	UF		Neg
01050107	6.9323	37.5328	4	01-04/06/2023	CDC	In	An.gambiae	UF		Neg
01050108	6.9323	37.5328	4	01-04/06/2023	CDC	In	An.gambiae	UF		Neg
01050109	6.9323	37.5328	4	01-04/06/2023	CDC	In	An.gambiae	UF		Neg
01050110	6.9323	37.5328	4	01-04/06/2023	CDC	In	An.gambiae	UF		Neg
01050111	6.9323	37.5328	4	01-04/06/2023	CDC	In	An.gambiae	UF		Neg
01050112	6.9323	37.5328	4	01-04/06/2023	CDC	In	An.gambiae	UF		Neg
01050113	6.9323	37.5328	4	01-04/06/2023	CDC	In	An.gambiae	UF		Neg
01050114	6.9323	37.5328	4	01-04/06/2023	CDC	In	An.gambiae	FF	Goat and Cow	Neg	Neg
01050115	6.9323	37.5328	4	01-04/06/2023	CDC	In	An.gambiae	UF		Neg
01050116	6.9323	37.5328	4	01-04/06/2023	CDC	In	An.gambiae	FF	Goat and Human	Neg	Pf+Pv
01050117	6.9323	37.5328	4	01-04/06/2023	CDC	In	An.gambiae	UF		Neg
01050118	6.9323	37.5328	4	01-04/06/2023	CDC	In	An.gambiae	FF	Goat and Cow	Neg	Neg
01050119	6.9323	37.5328	4	01-04/06/2023	CDC	In	An.gambiae	FF	Goat and Human	Neg	Pf
01050120	6.9323	37.5328	4	01-04/06/2023	CDC	In	An.gambiae	UF		Neg
01100101	6.90878	37.5145	4	01-04/06/2023	CDC	In	An.gambiae	UF		Neg
01100102	6.90878	37.5145	4	01-04/06/2023	CDC	In	An.gambiae	UF		Neg
01100103	6.90878	37.5145	4	01-04/06/2023	CDC	In	An.gambiae	UF		Neg
01100104	6.90878	37.5145	4	01-04/06/2023	CDC	In	An.gambiae	UF		Neg
01100105	6.90878	37.5145	4	01-04/06/2023	CDC	In	An.gambiae	UF		Neg
01110101	6.90931	37.5151	4	01-04/06/2023	CDC	In	An.gambiae	FF	Goat and Human	Neg	Neg
01120101	6.90877	37.5153	4	01-04/06/2023	CDC	Out	An.gambiae	UF		Neg
01120102	6.90877	37.5153	4	01-04/06/2023	CDC	Out	An.gambiae	UF		Neg
01120103	6.90877	37.5153	4	01-04/06/2023	CDC	Out	An.gambiae	UF		Neg
01120104	6.90877	37.5153	4	01-04/06/2023	CDC	Out	An.gambiae	UF		Neg
01120105	6.90877	37.5153	4	01-04/06/2023	CDC	Out	An.gambiae	UF		Neg
01130101	6.90944	37.5142	4	01-04/06/2023	CDC	In	An.gambiae	UF		Neg
01130102	6.90944	37.5142	4	01-04/06/2023	CDC	In	An.gambiae	UF		Neg
01130103	6.90944	37.5142	4	01-04/06/2023	CDC	In	An.gambiae	UF		Neg
01130104	6.90944	37.5142	4	01-04/06/2023	CDC	In	An.gambiae	UF		Neg
01130105	6.90944	37.5142	4	01-04/06/2023	CDC	In	An.gambiae	UF		Neg
01130106	6.90944	37.5142	4	01-04/06/2023	CDC	In	An.gambiae	UF		Neg
01130107	6.90944	37.5142	4	01-04/06/2023	CDC	In	An.gambiae	FF	Goat and Cow	Neg	Neg
01130108	6.90944	37.5142	4	01-04/06/2023	CDC	In	An.gambiae	UF		Neg
01130109	6.90944	37.5142	4	01-04/06/2023	CDC	In	An.gambiae	UF		Neg
01130110	6.90944	37.5142	4	01-04/06/2023	CDC	In	An.gambiae	UF		Neg
01130111	6.90944	37.5142	4	01-04/06/2023	CDC	In	An.gambiae	UF		Neg
01130112	6.90944	37.5142	4	01-04/06/2023	CDC	In	An.gambiae	UF		Neg
01130113	6.90944	37.5142	4	01-04/06/2023	CDC	In	An.gambiae	UF		Neg
01130114	6.90944	37.5142	4	01-04/06/2023	CDC	In	An.gambiae	UF		Neg
01130115	6.90944	37.5142	4	01-04/06/2023	CDC	In	An.gambiae	UF		Neg
01130116	6.90944	37.5142	4	01-04/06/2023	CDC	In	An.gambiae	UF		Neg
01130117	6.90944	37.5142	4	01-04/06/2023	CDC	In	An.gambiae	UF		Neg
01130118	6.90944	37.5142	4	01-04/06/2023	CDC	In	An.gambiae	FF	Human	Neg	Pv
01130119	6.90944	37.5142	4	01-04/06/2023	CDC	In	An.gambiae	UF		Neg
01130120	6.90944	37.5142	4	01-04/06/2023	CDC	In	An.gambiae	FF	Human and Cow	Neg	Neg
01130121	6.90944	37.5142	4	01-04/06/2023	CDC	In	An.gambiae	UF		Neg
01130122	6.90944	37.5142	4	01-04/06/2023	CDC	Out	An.gambiae	UF		Neg
01130123	6.90944	37.5142	4	01-04/06/2023	CDC	Out	An.gambiae	UF		Neg
01140101	6,907640	37,517630	4	01-04/06/2023	CDC	In	An.gambiae	UF		Neg
01140102	6,907640	37,517630	4	01-04/06/2023	CDC	In	An.gambiae	UF		Neg
01140103	6,907640	37,517630	4	01-04/06/2023	CDC	In	An.gambiae	UF		Neg
01140104	6,907640	37,517630	4	01-04/06/2023	CDC	In	An.gambiae	UF		Neg
01140105	6,907640	37,517630	4	01-04/06/2023	CDC	In	An.gambiae	UF		Neg
01140106	6,907640	37,517630	4	01-04/06/2023	CDC	In	An.gambiae	FF	Goat and Pig	Neg	Neg
01140107	6,907640	37,517630	4	01-04/06/2023	CDC	In	An.gambiae	UF		Neg
01140108	6,907640	37,517630	4	01-04/06/2023	CDC	In	An.gambiae	UF		Neg
01140109	6,907640	37,517630	4	01-04/06/2023	CDC	In	An.gambiae	UF		Neg
01140110	6,907640	37,517630	4	01-04/06/2023	CDC	In	An.gambiae	UF		Neg
01140111	6,907640	37,517630	4	01-04/06/2023	CDC	In	An.gambiae	UF		Neg
01140112	6,907640	37,517630	4	01-04/06/2023	CDC	In	An.gambiae	UF		Neg
01140113	6,907640	37,517630	4	01-04/06/2023	CDC	In	An.gambiae	UF		Neg
01140114	6,907640	37,517630	4	01-04/06/2023	CDC	In	An.gambiae	UF		Neg
01140115	6,907640	37,517630	4	01-04/06/2023	CDC	In	An.gambiae	UF		Neg
01140116	6,907640	37,517630	4	01-04/06/2023	CDC	In	An.gambiae	UF		Neg
01140117	6,907640	37,517630	4	01-04/06/2023	CDC	In	An.gambiae	UF		Neg
01140118	6,907640	37,517630	4	01-04/06/2023	CDC	In	An.gambiae	UF		Neg
01140119	6,907640	37,517630	4	01-04/06/2023	CDC	In	An.gambiae	UF		Neg
01140120	6,907640	37,517630	4	01-04/06/2023	CDC	In	An.gambiae	UF		Neg
01140121	6,907640	37,517630	4	01-04/06/2023	CDC	In	An.gambiae	UF		Neg
01140122	6,907640	37,517630	4	01-04/06/2023	CDC	In	An.gambiae	UF		Neg
01140123	6,907640	37,517630	4	01-04/06/2023	CDC	In	An.gambiae	UF		Neg
01140124	6,907640	37,517630	4	01-04/06/2023	CDC	In	An.gambiae	UF		Neg
01140125	6,907640	37,517630	4	01-04/06/2023	CDC	In	An.gambiae	UF		Neg
01140126	6,907640	37,517630	4	01-04/06/2023	CDC	In	An.gambiae	UF		Neg
01140127	6,907640	37,517630	4	01-04/06/2023	CDC	In	An.gambiae	UF		Neg
01140128	6,907640	37,517630	4	01-04/06/2023	CDC	In	An.gambiae	UF		Neg
01140129	6,907640	37,517630	4	01-04/06/2023	CDC	In	An.gambiae	UF		Neg
01140130	6,907640	37,517630	4	01-04/06/2023	CDC	In	An.gambiae	UF		Neg
01140131	6,907640	37,517630	4	01-04/06/2023	CDC	In	An.gambiae	UF		Neg
01140132	6,907640	37,517630	4	01-04/06/2023	CDC	In	An.gambiae	UF		Neg
01140133	6,907640	37,517630	4	01-04/06/2023	CDC	In	An.gambiae	UF		Neg
01140134	6,907640	37,517630	4	01-04/06/2023	CDC	In	An.gambiae	UF		Neg
01140135	6,907640	37,517630	4	01-04/06/2023	CDC	In	An.gambiae	UF		Neg
01140136	6,907640	37,517630	4	01-04/06/2023	CDC	In	An.gambiae	UF		Neg
01140137	6,907640	37,517630	4	01-04/06/2023	CDC	In	An.gambiae	UF		Neg
01140138	6,907640	37,517630	4	01-04/06/2023	CDC	In	An.gambiae	UF		Neg
01140139	6,907640	37,517630	4	01-04/06/2023	CDC	In	An.gambiae	UF		Neg
01140140	6,907640	37,517630	4	01-04/06/2023	CDC	In	An.gambiae	UF		Neg
01140141	6,907640	37,517630	4	01-04/06/2023	CDC	In	An.gambiae	UF		Neg
01140142	6,907640	37,517630	4	01-04/06/2023	CDC	In	An.gambiae	UF		Neg
01140143	6,907640	37,517630	4	01-04/06/2023	CDC	In	An.gambiae	UF		Neg
01140144	6,907640	37,517630	4	01-04/06/2023	CDC	In	An.gambiae	FF	Goat and Human	Neg	Neg
01140145	6,907640	37,517630	4	01-04/06/2023	CDC	In	An.gambiae	UF		Neg
01140146	6,907640	37,517630	4	01-04/06/2023	CDC	In	An.gambiae	FF	Goat and Human	Neg	Pf+Pv
01140147	6,907640	37,517630	4	01-04/06/2023	CDC	In	An.gambiae	FF	Negative	Neg	Neg
01140148	6,907640	37,517630	4	01-04/06/2023	CDC	In	An.gambiae	FF	Goat and Human	Neg	Pf
01170201	6.90763	37.5167	4	01-04/06/2023	PSC	In	An.gambiae	FF	Goat	Neg	Neg
01190201	6.90681	37.5193	4	01-04/06/2023	PSC	In	An.gambiae	UF		Neg
01190202	6.90681	37.5193	4	01-04/06/2023	PSC	In	An.gambiae	UF		Neg
01010101	6.93154	37.53	5	25-28/08/2023	CDC	In	An.gambiae	FF	Human	Neg	Neg
01010102	6.93154	37.53	5	25-28/08/2023	CDC	In	An.gambiae	FF	Goat and Human	Neg	Neg
01010103	6.93154	37.53	5	25-28/08/2023	CDC	Out	An.gambiae	UF		Neg
01010104	6.93154	37.53	5	25-28/08/2023	CDC	Out	An.gambiae	UF		Neg
01010105	6.93154	37.53	5	25-28/08/2023	CDC	Out	An.gambiae	UF		Neg
01020101	6.9317	37,530640	5	25-28/08/2023	CDC	In	An.gambiae	FF	Goat and Human	Neg	Pf
01020102	6.9317	37,530640	5	25-28/08/2023	CDC	In	An.gambiae	FF	Goat, Human and Cow	Neg	Pf
01020103	6.9317	37,530640	5	25-28/08/2023	CDC	In	An.gambiae	FF	Goat	Neg	Neg
01020104	6.9317	37,530640	5	25-28/08/2023	CDC	In	An.gambiae	FF	Goat and Human	Neg	Pv
01020105	6.9317	37,530640	5	25-28/08/2023	CDC	In	An.gambiae	FF	Negative	Neg	Neg
01020106	6.9317	37,530640	5	25-28/08/2023	CDC	In	An.gambiae	HG	Goat and Human	Neg	Neg
01020107	6.9317	37,530640	5	25-28/08/2023	CDC	In	An.gambiae	FF	Goat and Human	Pf	Pf
01020108	6.9317	37,530640	5	25-28/08/2023	CDC	In	An.gambiae	FF	Goat and Human	Neg	Neg
01020109	6.9317	37,530640	5	25-28/08/2023	CDC	In	An.gambiae	UF		Neg
01040101	6.9317	37,532580	5	25-28/08/2023	CDC	In	An.gambiae	UF		Neg
01040102	6.9317	37,532580	5	25-28/08/2023	CDC	Out	An.gambiae	UF		Neg
01040103	6.9317	37,532580	5	25-28/08/2023	CDC	Out	An.pretoriensis	UF		Neg
01040104	6.9317	37,532580	5	25-28/08/2023	CDC	Out	An.pretoriensis	UF		Neg
01050101	6.9323	37.5328	5	25-28/08/2023	CDC	In	An.gambiae	UF		Neg
01050102	6.9323	37.5328	5	25-28/08/2023	CDC	In	An.gambiae	UF		Neg
01050103	6.9323	37.5328	5	25-28/08/2023	CDC	In	An.gambiae	HG	Goat and Human	Neg	Neg
01050104	6.9323	37.5328	5	25-28/08/2023	CDC	In	An.gambiae	UF		Neg
01050105	6.9323	37.5328	5	25-28/08/2023	CDC	In	An.gambiae	FF	Cow	Neg	Neg
01050106	6.9323	37.5328	5	25-28/08/2023	CDC	In	An.gambiae	UF		Neg
01050107	6.9323	37.5328	5	25-28/08/2023	CDC	In	An.gambiae	UF		Neg
01050108	6.9323	37.5328	5	25-28/08/2023	CDC	In	An.gambiae	UF		Neg
01050109	6.9323	37.5328	5	25-28/08/2023	CDC	In	An.gambiae	UF		Neg
01050110	6.9323	37.5328	5	25-28/08/2023	CDC	In	An.gambiae	UF		Neg
01050111	6.9323	37.5328	5	25-28/08/2023	CDC	In	An.gambiae	UF		Neg
01050112	6.9323	37.5328	5	25-28/08/2023	CDC	In	An.gambiae	UF		Neg
01050113	6.9323	37.5328	5	25-28/08/2023	CDC	In	An.gambiae	UF		Neg
01050114	6.9323	37.5328	5	25-28/08/2023	CDC	In	An.gambiae	FF	Goat and Human	Neg	Neg
01050115	6.9323	37.5328	5	25-28/08/2023	CDC	In	An.gambiae	FF	Goat and Cow	Neg	Neg
01050116	6.9323	37.5328	5	25-28/08/2023	CDC	In	An.gambiae	FF	Goat and Cow	Neg	Neg
01050117	6.9323	37.5328	5	25-28/08/2023	CDC	In	An.gambiae	FF	Goat and Human	Neg	Neg
01050118	6.9323	37.5328	5	25-28/08/2023	CDC	In	An.gambiae	FF	Cow	Neg	Neg
01050119	6.9323	37.5328	5	25-28/08/2023	CDC	In	An.gambiae	HG	Goat and Human	Neg	Neg
01050120	6.9323	37.5328	5	25-28/08/2023	CDC	In	An.gambiae	FF	Goat and Cow	Neg	Neg
01050121	6.9323	37.5328	5	25-28/08/2023	CDC	Out	An.gambiae	UF		Neg
01080201	6,932220	37.5287	5	25-28/08/2023	PSC	In	An.gambiae	FF	Negative	Neg	Neg
01080202	6,932220	37.5287	5	25-28/08/2023	PSC	In	An.gambiae	FF	Negative	Neg	Neg
01090201	6.93158	37.5296	5	25-28/08/2023	PSC	In	An.gambiae	UF		Neg
01090202	6.93158	37.5296	5	25-28/08/2023	PSC	In	An.gambiae	UF		Neg
01090203	6.93158	37.5296	5	25-28/08/2023	PSC	In	An.gambiae	UF		Neg
01090204	6.93158	37.5296	5	25-28/08/2023	PSC	In	An.gambiae	UF		Neg
01090205	6.93158	37.5296	5	25-28/08/2023	PSC	In	An.gambiae	UF		Neg
01090206	6.93158	37.5296	5	25-28/08/2023	PSC	In	An.gambiae	UF		Neg
01090207	6.93158	37.5296	5	25-28/08/2023	PSC	In	An.gambiae	UF		Neg
01090208	6.93158	37.5296	5	25-28/08/2023	PSC	In	An.gambiae	UF		Neg
01090209	6.93158	37.5296	5	25-28/08/2023	PSC	In	An.gambiae	UF		Neg
01090210	6.93158	37.5296	5	25-28/08/2023	PSC	In	An.gambiae	UF		Neg
01090211	6.93158	37.5296	5	25-28/08/2023	PSC	In	An.gambiae	UF		Neg
01090212	6.93158	37.5296	5	25-28/08/2023	PSC	In	An.gambiae	UF		Neg
01090213	6.93158	37.5296	5	25-28/08/2023	PSC	In	An.gambiae	UF		Neg
01090214	6.93158	37.5296	5	25-28/08/2023	PSC	In	An.gambiae	UF		Neg
01090215	6.93158	37.5296	5	25-28/08/2023	PSC	In	An.gambiae	FF	Human	Neg	Pv
01090216	6.93158	37.5296	5	25-28/08/2023	PSC	In	An.gambiae	FF	Negative	Neg	Neg
01100101	6.90878	37.5145	5	25-28/08/2023	CDC	In	An.gambiae	HG	Negative	Neg	Pv
01100102	6.90878	37.5145	5	25-28/08/2023	CDC	Out	An.gambiae	FF	Goat and Human	Neg	Pv
01110101	6.90931	37.5151	5	25-28/08/2023	CDC	In	An.gambiae	UF		Neg
01110102	6.90931	37.5151	5	25-28/08/2023	CDC	In	An.gambiae	UF		Neg
01110103	6.90931	37.5151	5	25-28/08/2023	CDC	In	An.gambiae	UF		Neg
01110104	6.90931	37.5151	5	25-28/08/2023	CDC	In	An.gambiae	UF		Neg
01110105	6.90931	37.5151	5	25-28/08/2023	CDC	In	An.gambiae	UF		Neg
01110106	6.90931	37.5151	5	25-28/08/2023	CDC	In	An.gambiae	UF		Neg
01110107	6.90931	37.5151	5	25-28/08/2023	CDC	Out	An.gambiae	UF		Neg
01110108	6.90931	37.5151	5	25-28/08/2023	CDC	Out	An.gambiae	UF		Neg
01110109	6.90931	37.5151	5	25-28/08/2023	CDC	Out	An.gambiae	UF		Neg
01110110	6.90931	37.5151	5	25-28/08/2023	CDC	Out	An.gambiae	UF		Neg
01120101	6.90877	37.5153	5	25-28/08/2023	CDC	In	An.gambiae	UF		Neg
01120102	6.90877	37.5153	5	25-28/08/2023	CDC	In	An.gambiae	UF		Neg
01120103	6.90877	37.5153	5	25-28/08/2023	CDC	In	An.gambiae	UF		Neg
01120104	6.90877	37.5153	5	25-28/08/2023	CDC	In	An.gambiae	UF		Neg
01120105	6.90877	37.5153	5	25-28/08/2023	CDC	In	An.gambiae	UF		Neg
01120106	6.90877	37.5153	5	25-28/08/2023	CDC	In	An.gambiae	FF	Human	Neg	Neg
01120107	6.90877	37.5153	5	25-28/08/2023	CDC	In	An.gambiae	HG	Goat and Human	Neg	Pf
01120108	6.90877	37.5153	5	25-28/08/2023	CDC	In	An.gambiae	FF	Goat and Human	Neg	Neg
01120109	6.90877	37.5153	5	25-28/08/2023	CDC	Out	An.gambiae	FF	Negative	Neg	Neg
01130101	6.90944	37.5142	5	25-28/08/2023	CDC	In	An.gambiae	FF	Negative	Neg	Neg
01130102	6.90944	37.5142	5	25-28/08/2023	CDC	In	An.gambiae	HG	Human	Neg	Neg
01130103	6.90944	37.5142	5	25-28/08/2023	CDC	In	An.gambiae	FF	Goat and Cow	Neg	Neg
01130104	6.90944	37.5142	5	25-28/08/2023	CDC	In	An.gambiae	FF	Negative	Neg	Pv
01130105	6.90944	37.5142	5	25-28/08/2023	CDC	In	An.gambiae	FF	Human and Sheep	Neg	Pv
01130106	6.90944	37.5142	5	25-28/08/2023	CDC	In	An.gambiae	UF		Neg
01130107	6.90944	37.5142	5	25-28/08/2023	CDC	In	An.gambiae	FF	Goat and Human	Neg	Neg
01130108	6.90944	37.5142	5	25-28/08/2023	CDC	In	An.gambiae	FF	Human and Sheep	Neg	Pv
01130109	6.90944	37.5142	5	25-28/08/2023	CDC	In	An.gambiae	FF	Goat and Human	Neg	Pv
01130110	6.90944	37.5142	5	25-28/08/2023	CDC	Out	An.gambiae	UF		Neg
01130111	6.90944	37.5142	5	25-28/08/2023	CDC	Out	An.gambiae	UF		Neg
01130112	6.90944	37.5142	5	25-28/08/2023	CDC	Out	An.gambiae	UF		Neg
01130113	6.90944	37.5142	5	25-28/08/2023	CDC	Out	An.gambiae	UF		Neg
01130114	6.90944	37.5142	5	25-28/08/2023	CDC	Out	An.gambiae	FF	Negative	Neg	Neg
01140101	6,907640	37,517630	5	25-28/08/2023	CDC	In	An.gambiae	UF		Neg
01140102	6,907640	37,517630	5	25-28/08/2023	CDC	In	An.gambiae	UF		Neg
01140103	6,907640	37,517630	5	25-28/08/2023	CDC	In	An.gambiae	UF		Neg
01140104	6,907640	37,517630	5	25-28/08/2023	CDC	In	An.gambiae	FF	Goat and Human	Neg	Neg
01140105	6,907640	37,517630	5	25-28/08/2023	CDC	In	An.gambiae	FF	Goat and Human	Neg	Neg
01140106	6,907640	37,517630	5	25-28/08/2023	CDC	In	An.gambiae	FF	Goat and Human	Neg	Neg
01140107	6,907640	37,517630	5	25-28/08/2023	CDC	In	An.gambiae	FF	Goat and Human	Neg	Neg
02010101	6.93454	38.1296	1	05-08/11/2022	CDC	In	An.gambiae	UF		Neg
02010102	6.93454	38.1296	1	05-08/11/2022	CDC	In	An.gambiae	UF		Neg
02010103	6.93454	38.1296	1	05-08/11/2022	CDC	In	An.gambiae	UF		Neg
02010104	6.93454	38.1296	1	05-08/11/2022	CDC	In	An.gambiae	UF		Neg
02010105	6.93454	38.1296	1	05-08/11/2022	CDC	In	An.gambiae	UF		Neg
02010106	6.93454	38.1296	1	05-08/11/2022	CDC	In	An.gambiae	UF		Neg
02010107	6.93454	38.1296	1	05-08/11/2022	CDC	In	An.gambiae	UF		Neg
02010108	6.93454	38.1296	1	05-08/11/2022	CDC	In	An.gambiae	UF		Neg
02010109	6.93454	38.1296	1	05-08/11/2022	CDC	In	An.gambiae	UF		Neg
02010110	6.93454	38.1296	1	05-08/11/2022	CDC	In	An.gambiae	HG	Negative	Neg	Neg
02010111	6.93454	38.1296	1	05-08/11/2022	CDC	In	An.gambiae	UF		Neg
02010112	6.93454	38.1296	1	05-08/11/2022	CDC	In	An.gambiae	HG	Goat and Human	Neg	Neg
02010113	6.93454	38.1296	1	05-08/11/2022	CDC	In	An.pharoensis	UF		Neg
02010114	6.93454	38.1296	1	05-08/11/2022	CDC	In	An.gambiae	FF	Goat and Human	Neg	Pf
02010115	6.93454	38.1296	1	05-08/11/2022	CDC	In	An.gambiae	UF		Neg
02010116	6.93454	38.1296	1	05-08/11/2022	CDC	In	An.gambiae	FF	Goat and Human	Neg	Pf
02010117	6.93454	38.1296	1	05-08/11/2022	CDC	In	An.gambiae	UF		Neg
02010118	6.93454	38.1296	1	05-08/11/2022	CDC	In	An.gambiae	FF	Goat and Human	Neg	Neg
02010119	6.93454	38.1296	1	05-08/11/2022	CDC	In	An.gambiae	FF	Goat and Human	Neg	Pf
02010120	6.93454	38.1296	1	05-08/11/2022	CDC	In	An.gambiae	FF	Goat and Human	Neg	Neg
02010121	6.93454	38.1296	1	05-08/11/2022	CDC	In	An.gambiae	FF	Goat and Human	Neg	Neg
02010122	6.93454	38.1296	1	05-08/11/2022	CDC	Out	An.gambiae	UF		Neg
02010123	6.93454	38.1296	1	05-08/11/2022	CDC	Out	An.gambiae	UF		Neg
02010124	6.93454	38.1296	1	05-08/11/2022	CDC	Out	An.gambiae	UF		Neg
02010125	6.93454	38.1296	1	05-08/11/2022	CDC	Out	An.gambiae	UF		Neg
02010126	6.93454	38.1296	1	05-08/11/2022	CDC	Out	An.gambiae	UF		Neg
02020101	6,934230	38.1292	1	05-08/11/2022	CDC	In	An.gambiae	UF		Neg
02020102	6,934230	38.1292	1	05-08/11/2022	CDC	In	An.gambiae	UF		Neg
02020103	6,934230	38.1292	1	05-08/11/2022	CDC	In	An.gambiae	UF		Neg
02020104	6,934230	38.1292	1	05-08/11/2022	CDC	In	An.gambiae	UF		Neg
02020105	6,934230	38.1292	1	05-08/11/2022	CDC	In	An.gambiae	UF		Neg
02020106	6,934230	38.1292	1	05-08/11/2022	CDC	In	An.gambiae	UF		Neg
02020107	6,934230	38.1292	1	05-08/11/2022	CDC	In	An.gambiae	UF		Neg
02020108	6,934230	38.1292	1	05-08/11/2022	CDC	In	An.gambiae	UF		Neg
02020109	6,934230	38.1292	1	05-08/11/2022	CDC	In	An.gambiae	UF		Neg
02020110	6,934230	38.1292	1	05-08/11/2022	CDC	In	An.gambiae	UF		Neg
02020111	6,934230	38.1292	1	05-08/11/2022	CDC	In	An.gambiae	HG	Cow	Neg	Neg
02020112	6,934230	38.1292	1	05-08/11/2022	CDC	In	An.gambiae	UF		Neg
02020113	6,934230	38.1292	1	05-08/11/2022	CDC	In	An.gambiae	UF		Neg
02020114	6,934230	38.1292	1	05-08/11/2022	CDC	In	An.gambiae	UF		Neg
02020115	6,934230	38.1292	1	05-08/11/2022	CDC	In	An.gambiae	UF		Neg
02020116	6,934230	38.1292	1	05-08/11/2022	CDC	In	An.gambiae	UF		Neg
02020117	6,934230	38.1292	1	05-08/11/2022	CDC	In	An.gambiae	UF		Neg
02020118	6,934230	38.1292	1	05-08/11/2022	CDC	In	An.gambiae	UF		Neg
02020119	6,934230	38.1292	1	05-08/11/2022	CDC	In	An.gambiae	UF		Neg
02020120	6,934230	38.1292	1	05-08/11/2022	CDC	In	An.gambiae	UF		Neg
02020121	6,934230	38.1292	1	05-08/11/2022	CDC	In	An.gambiae	UF		Neg
02020122	6,934230	38.1292	1	05-08/11/2022	CDC	In	An.gambiae	UF		Neg
02020123	6,934230	38.1292	1	05-08/11/2022	CDC	In	An.gambiae	UF		Neg
02020124	6,934230	38.1292	1	05-08/11/2022	CDC	In	An.gambiae	UF		Neg
02020125	6,934230	38.1292	1	05-08/11/2022	CDC	In	An.gambiae	UF		Neg
02020126	6,934230	38.1292	1	05-08/11/2022	CDC	In	An.gambiae	UF		Neg
02020127	6,934230	38.1292	1	05-08/11/2022	CDC	In	An.gambiae	UF		Neg
02020128	6,934230	38.1292	1	05-08/11/2022	CDC	In	An.gambiae	UF		Neg
02020129	6,934230	38.1292	1	05-08/11/2022	CDC	In	An.gambiae	UF		Neg
02020130	6,934230	38.1292	1	05-08/11/2022	CDC	In	An.gambiae	UF		Neg
02020131	6,934230	38.1292	1	05-08/11/2022	CDC	In	An.gambiae	UF		Neg
02020132	6,934230	38.1292	1	05-08/11/2022	CDC	In	An.gambiae	FF	Goat and Human	Neg	Neg
02020133	6,934230	38.1292	1	05-08/11/2022	CDC	In	An.gambiae	HG	Human	Neg	Neg
02020134	6,934230	38.1292	1	05-08/11/2022	CDC	Out	An.gambiae	FF	Human	Neg	Neg
02020135	6,934230	38.1292	1	05-08/11/2022	CDC	Out	An.gambiae	UF		Neg
02020136	6,934230	38.1292	1	05-08/11/2022	CDC	Out	An.gambiae	UF		Neg
02030101	6.93411	38.1289	1	05-08/11/2022	CDC	In	An.gambiae	FF	Human	Neg	Neg
02030102	6.93411	38.1289	1	05-08/11/2022	CDC	Out	An.gambiae	UF		Neg
02030103	6.93411	38.1289	1	05-08/11/2022	CDC	Out	An.gambiae	UF		Neg
02030104	6.93411	38.1289	1	05-08/11/2022	CDC	Out	An.gambiae	UF		Neg
02040101	6,934310	38.1295	1	05-08/11/2022	CDC	In	An.gambiae	UF		Neg
02040102	6,934310	38.1295	1	05-08/11/2022	CDC	In	An.gambiae	FF	Human	Neg	Neg
02040103	6,934310	38.1295	1	05-08/11/2022	CDC	In	An.gambiae	FF	Human	Neg	Neg
02050101	6.93349	38.1285	1	05-08/11/2022	CDC	In	An.gambiae	FF	Negative	Neg	Neg
02060201	6,933877	38.1288	1	05-08/11/2022	PSC	In	An.gambiae	HG	Human and Cow	Neg	Neg
02070201	6.93361	38.1288	1	05-08/11/2022	PSC	In	An.gambiae	HG	Goat, Human, Pig and Sheep	Neg	Pf
02070202	6.93361	38.1288	1	05-08/11/2022	PSC	In	An.gambiae	UF		Neg
02070203	6.93361	38.1288	1	05-08/11/2022	PSC	In	An.gambiae	HG	Human	Neg	Neg
02100201	6.93474	38.1296	1	05-08/11/2022	PSC	In	An.gambiae	FF	Goat and Human	Neg	Neg
02100202	6.93474	38.1296	1	05-08/11/2022	PSC	In	An.gambiae	FF	Goat and Human	Neg	Neg
02100203	6.93474	38.1296	1	05-08/11/2022	PSC	In	An.gambiae	FF	Human	Neg	Neg
02100204	6.93474	38.1296	1	05-08/11/2022	PSC	In	An.gambiae	UF		Neg
02110101	6.93561	38.1303	1	05-08/11/2022	CDC	In	An.gambiae	UF		Neg
02110102	6.93561	38.1303	1	05-08/11/2022	CDC	In	An.gambiae	UF		Neg
02110103	6.93561	38.1303	1	05-08/11/2022	CDC	In	An.gambiae	UF		Neg
02110104	6.93561	38.1303	1	05-08/11/2022	CDC	In	An.gambiae	UF		Neg
02110105	6.93561	38.1303	1	05-08/11/2022	CDC	In	An.gambiae	UF		Neg
02110106	6.93561	38.1303	1	05-08/11/2022	CDC	In	An.gambiae	UF		Neg
02110107	6.93561	38.1303	1	05-08/11/2022	CDC	In	An.gambiae	UF		Neg
02110108	6.93561	38.1303	1	05-08/11/2022	CDC	In	An.gambiae	UF		Neg
02110109	6.93561	38.1303	1	05-08/11/2022	CDC	In	An.gambiae	UF		Neg
02110110	6.93561	38.1303	1	05-08/11/2022	CDC	In	An.gambiae	UF		Neg
02110111	6.93561	38.1303	1	05-08/11/2022	CDC	In	An.gambiae	UF		Neg
02110112	6.93561	38.1303	1	05-08/11/2022	CDC	In	An.gambiae	UF		Neg
02110113	6.93561	38.1303	1	05-08/11/2022	CDC	In	An.gambiae	UF		Neg
02110114	6.93561	38.1303	1	05-08/11/2022	CDC	In	An.gambiae	UF		Neg
02110115	6.93561	38.1303	1	05-08/11/2022	CDC	In	An.gambiae	UF		Neg
02110116	6.93561	38.1303	1	05-08/11/2022	CDC	In	An.gambiae	UF		Neg
02110117	6.93561	38.1303	1	05-08/11/2022	CDC	In	An.gambiae	UF		Neg
02110118	6.93561	38.1303	1	05-08/11/2022	CDC	In	An.gambiae	UF		Neg
02110119	6.93561	38.1303	1	05-08/11/2022	CDC	In	An.gambiae	FF	Goat and Human	Neg	Neg
02110120	6.93561	38.1303	1	05-08/11/2022	CDC	In	An.gambiae	FF	Cow	Neg	Neg
02110121	6.93561	38.1303	1	05-08/11/2022	CDC	In	An.gambiae	FF	Cow	Neg	Neg
02110122	6.93561	38.1303	1	05-08/11/2022	CDC	In	An.gambiae	UF		Neg
02110123	6.93561	38.1303	1	05-08/11/2022	CDC	In	An.gambiae	FF	Cow	Neg	Neg
02110124	6.93561	38.1303	1	05-08/11/2022	CDC	In	An.gambiae	FF	Goat and Human	Neg	Neg
02110125	6.93561	38.1303	1	05-08/11/2022	CDC	In	An.gambiae	UF		Neg
02110126	6.93561	38.1303	1	05-08/11/2022	CDC	In	An.gambiae	UF		Neg
02110127	6.93561	38.1303	1	05-08/11/2022	CDC	In	An.gambiae	UF		Neg
02110128	6.93561	38.1303	1	05-08/11/2022	CDC	In	An.gambiae	FF	Human	Neg	Neg
02120101	6.93614	38.1301	1	05-08/11/2022	CDC	In	An.gambiae	HG	Human	Neg	Neg
02120102	6.93614	38.1301	1	05-08/11/2022	CDC	In	An.gambiae	HG	Negative	Neg	Neg
02120103	6.93614	38.1301	1	05-08/11/2022	CDC	In	An.gambiae	FF	Goat and Human	Neg	Neg
02120104	6.93614	38.1301	1	05-08/11/2022	CDC	In	An.gambiae	FF	Human	Neg	Neg
02120105	6.93614	38.1301	1	05-08/11/2022	CDC	In	An.gambiae	FF	Human	Pv-210	Pv
02120106	6.93614	38.1301	1	05-08/11/2022	CDC	In	An.gambiae	HG	Human	Neg	Neg
02120107	6.93614	38.1301	1	05-08/11/2022	CDC	In	An.gambiae	UF		Neg
02120108	6.93614	38.1301	1	05-08/11/2022	CDC	In	An.gambiae	FF	Goat and Human	Neg	Neg
02120109	6.93614	38.1301	1	05-08/11/2022	CDC	In	An.gambiae	HG	Negative	Neg	Neg
02120110	6.93614	38.1301	1	05-08/11/2022	CDC	In	An.gambiae	HG	Negative	Neg	Neg
02120111	6.93614	38.1301	1	05-08/11/2022	CDC	In	An.gambiae	FF	Negative	Neg	Neg
02120112	6.93614	38.1301	1	05-08/11/2022	CDC	In	An.gambiae	FF	Negative	Neg	Neg
02120113	6.93614	38.1301	1	05-08/11/2022	CDC	In	An.gambiae	FF	Cow	Neg	Neg
02120114	6.93614	38.1301	1	05-08/11/2022	CDC	In	An.gambiae	FF	Negative	Neg	Neg
02120115	6.93614	38.1301	1	05-08/11/2022	CDC	In	An.gambiae	FF	Human	Neg	Neg
02120116	6.93614	38.1301	1	05-08/11/2022	CDC	In	An.gambiae	FF	Goat and Human	Neg	Neg
02120117	6.93614	38.1301	1	05-08/11/2022	CDC	In	An.gambiae	FF	Cow	Neg	Neg
02120118	6.93614	38.1301	1	05-08/11/2022	CDC	In	An.gambiae	FF	Negative	Neg	Neg
02120119	6.93614	38.1301	1	05-08/11/2022	CDC	In	An.gambiae	FF	Goat and Cow	Neg	Neg
02120120	6.93614	38.1301	1	05-08/11/2022	CDC	In	An.gambiae	FF	Negative	Neg	Neg
02120121	6.93614	38.1301	1	05-08/11/2022	CDC	In	An.gambiae	FF	Human	Neg	Neg
02120122	6.93614	38.1301	1	05-08/11/2022	CDC	In	An.gambiae	UF		Neg
02120123	6.93614	38.1301	1	05-08/11/2022	CDC	In	An.gambiae	UF		Neg
02120124	6.93614	38.1301	1	05-08/11/2022	CDC	In	An.gambiae	UF		Neg
02120125	6.93614	38.1301	1	05-08/11/2022	CDC	In	An.gambiae	UF		Neg
02120126	6.93614	38.1301	1	05-08/11/2022	CDC	In	An.gambiae	UF		Neg
02120127	6.93614	38.1301	1	05-08/11/2022	CDC	In	An.gambiae	UF		Neg
02120128	6.93614	38.1301	1	05-08/11/2022	CDC	In	An.gambiae	UF		Neg
02120129	6.93614	38.1301	1	05-08/11/2022	CDC	In	An.gambiae	UF		Neg
02120130	6.93614	38.1301	1	05-08/11/2022	CDC	In	An.gambiae	UF		Neg
02120131	6.93614	38.1301	1	05-08/11/2022	CDC	In	An.gambiae	UF		Neg
02120132	6.93614	38.1301	1	05-08/11/2022	CDC	In	An.gambiae	UF		Neg
02120133	6.93614	38.1301	1	05-08/11/2022	CDC	In	An.gambiae	UF		Neg
02120134	6.93614	38.1301	1	05-08/11/2022	CDC	In	An.pharoensis	UF		Neg
02120135	6.93614	38.1301	1	05-08/11/2022	CDC	Out	An.gambiae	UF		Neg
02130101	6,935740	38.131	1	05-08/11/2022	CDC	In	An.gambiae	UF		Neg
02130102	6,935740	38.131	1	05-08/11/2022	CDC	In	An.gambiae	HG	Negative	Neg	Neg
02130103	6,935740	38.131	1	05-08/11/2022	CDC	In	An.gambiae	UF		Neg
02130104	6,935740	38.131	1	05-08/11/2022	CDC	In	An.gambiae	UF		Neg
02130105	6,935740	38.131	1	05-08/11/2022	CDC	In	An.gambiae	FF	Negative	Neg	Neg
02130106	6,935740	38.131	1	05-08/11/2022	CDC	In	An.gambiae	FF	Negative	Neg	Neg
02130107	6,935740	38.131	1	05-08/11/2022	CDC	In	An.gambiae	UF		Neg
02130108	6,935740	38.131	1	05-08/11/2022	CDC	In	An.gambiae	FF	Human	Neg	Neg
02130109	6,935740	38.131	1	05-08/11/2022	CDC	In	An.gambiae	FF	Human	Neg	Neg
02130110	6,935740	38.131	1	05-08/11/2022	CDC	Out	An.gambiae	HG	Negative	Neg	Neg
02140101	6,935480	38.1308	1	05-08/11/2022	CDC	In	An.gambiae	HG	Negative	Neg	Neg
02140102	6,935480	38.1308	1	05-08/11/2022	CDC	In	An.gambiae	UF		Neg
02140103	6,935480	38.1308	1	05-08/11/2022	CDC	In	An.gambiae	UF		Neg
02140104	6,935480	38.1308	1	05-08/11/2022	CDC	Out	An.gambiae	UF		Neg
02150101	6.9355	38,131210	1	05-08/11/2022	CDC	In	An.gambiae	UF		Neg
02150102	6.9355	38,131210	1	05-08/11/2022	CDC	In	An.gambiae	UF		Neg
02150103	6.9355	38,131210	1	05-08/11/2022	CDC	In	An.gambiae	UF		Neg
02150104	6.9355	38,131210	1	05-08/11/2022	CDC	In	An.gambiae	UF		Neg
02150105	6.9355	38,131210	1	05-08/11/2022	CDC	In	An.gambiae	UF		Neg
02150106	6.9355	38,131210	1	05-08/11/2022	CDC	In	An.gambiae	FF	Negative	Neg	Neg
02150107	6.9355	38,131210	1	05-08/11/2022	CDC	In	An.gambiae	FF	Human	Neg	Neg
02150108	6.9355	38,131210	1	05-08/11/2022	CDC	In	An.gambiae	UF		Neg
02150109	6.9355	38,131210	1	05-08/11/2022	CDC	In	An.gambiae	FF	Human	Neg	Neg
02150110	6.9355	38,131210	1	05-08/11/2022	CDC	In	An.gambiae	UF		Neg
02150111	6.9355	38,131210	1	05-08/11/2022	CDC	Out	An.gambiae	UF		Neg
02150112	6.9355	38,131210	1	05-08/11/2022	CDC	Out	An.gambiae	UF		Neg
02160201	6.93537	38.1311	1	05-08/11/2022	PSC	In	An.gambiae	FF	Human	Neg	Pv
02160202	6.93537	38.1311	1	05-08/11/2022	PSC	In	An.gambiae	FF	Human	Neg	Neg
02160203	6.93537	38.1311	1	05-08/11/2022	PSC	In	An.gambiae	FF	Human	Neg	Pf
02160204	6.93537	38.1311	1	05-08/11/2022	PSC	In	An.gambiae	UF		Neg
02170201	6.93565	38,129750	1	05-08/11/2022	PSC	In	An.gambiae	UF		Neg
02180201	6.93565	38.1311	1	05-08/11/2022	PSC	In	An.gambiae	FF	Negative	Neg	Neg
02180202	6.93565	38.1311	1	05-08/11/2022	PSC	In	An.gambiae	FF	Human	Neg	Pf
02180203	6.93565	38.1311	1	05-08/11/2022	PSC	In	An.gambiae	FF	Goat and Human	Neg	Neg
02190201	6.93619	38.1299	1	05-08/11/2022	PSC	In	An.gambiae	UF		Neg
02190202	6.93619	38.1299	1	05-08/11/2022	PSC	In	An.gambiae	FF	Human	Neg	Neg
02190203	6.93619	38.1299	1	05-08/11/2022	PSC	In	An.gambiae	UF		Neg
02190204	6.93619	38.1299	1	05-08/11/2022	PSC	In	An.gambiae	FF	Goat and Human	Neg	Neg
02190205	6.93619	38.1299	1	05-08/11/2022	PSC	In	An.gambiae	UF		Neg
02190206	6.93619	38.1299	1	05-08/11/2022	PSC	In	An.gambiae	FF	Goat and Human	Neg	Neg
02010101	6.93454	38.1296	2	20-24/01/2023	CDC	In	An.gambiae	HG	Human	Neg	Neg
02010102	6.93454	38.1296	2	20-24/01/2023	CDC	In	An.gambiae	UF		Neg
02010103	6.93454	38.1296	2	20-24/01/2023	CDC	In	An.gambiae	UF		Neg
02010104	6.93454	38.1296	2	20-24/01/2023	CDC	In	An.gambiae	UF		Neg
02010105	6.93454	38.1296	2	20-24/01/2023	CDC	In	An.gambiae	UF		Neg
02010106	6.93454	38.1296	2	20-24/01/2023	CDC	In	An.gambiae	UF		Neg
02010107	6.93454	38.1296	2	20-24/01/2023	CDC	In	An.gambiae	HG	Goat	Neg	Neg
02010108	6.93454	38.1296	2	20-24/01/2023	CDC	In	An.gambiae	UF		Neg
02010109	6.93454	38.1296	2	20-24/01/2023	CDC	In	An.gambiae	HG	Human	Neg	Neg
02010110	6.93454	38.1296	2	20-24/01/2023	CDC	In	An.gambiae	UF		Neg
02010111	6.93454	38.1296	2	20-24/01/2023	CDC	In	An.gambiae	HG	Human	Neg	Neg
02010112	6.93454	38.1296	2	20-24/01/2023	CDC	In	An.gambiae	UF		Neg
02010113	6.93454	38.1296	2	20-24/01/2023	CDC	In	An.gambiae	UF		Neg
02010114	6.93454	38.1296	2	20-24/01/2023	CDC	In	An.gambiae	FF	Human	Neg	Neg
02010115	6.93454	38.1296	2	20-24/01/2023	CDC	In	An.gambiae	FF	Goat and Human	Neg	Neg
02010116	6.93454	38.1296	2	20-24/01/2023	CDC	In	An.gambiae	FF	Cow	Neg	Neg
02010117	6.93454	38.1296	2	20-24/01/2023	CDC	In	An.gambiae	FF	Human	Neg	Neg
02010118	6.93454	38.1296	2	20-24/01/2023	CDC	In	An.gambiae	FF	Human	Neg	Neg
02010119	6.93454	38.1296	2	20-24/01/2023	CDC	In	An.gambiae	FF	Human	Neg	Pf
02010120	6.93454	38.1296	2	20-24/01/2023	CDC	In	An.gambiae	FF	Cow	Neg	Neg
02010121	6.93454	38.1296	2	20-24/01/2023	CDC	In	An.gambiae	FF	Human	Neg	Neg
02010122	6.93454	38.1296	2	20-24/01/2023	CDC	In	An.gambiae	FF	Human	Neg	Neg
02010123	6.93454	38.1296	2	20-24/01/2023	CDC	In	An.gambiae	FF	Human	Neg	Neg
02010124	6.93454	38.1296	2	20-24/01/2023	CDC	In	An.gambiae	FF	Human	Neg	Pv
02010125	6.93454	38.1296	2	20-24/01/2023	CDC	In	An.gambiae	FF	Human	Neg	Neg
02010126	6.93454	38.1296	2	20-24/01/2023	CDC	In	An.gambiae	UF		Neg
02010127	6.93454	38.1296	2	20-24/01/2023	CDC	In	An.gambiae	FF	Negative	Neg	Neg
02010128	6.93454	38.1296	2	20-24/01/2023	CDC	In	An.gambiae	FF	Goat and Human	Neg	Neg
02010129	6.93454	38.1296	2	20-24/01/2023	CDC	In	An.gambiae	FF	Goat and Human	Neg	Pf
02010130	6.93454	38.1296	2	20-24/01/2023	CDC	Out	An.gambiae	HG	Human	Neg	Neg
02010131	6.93454	38.1296	2	20-24/01/2023	CDC	Out	An.gambiae	UF		Neg
02010132	6.93454	38.1296	2	20-24/01/2023	CDC	Out	An.gambiae	UF		Neg
02010133	6.93454	38.1296	2	20-24/01/2023	CDC	Out	An.gambiae	UF		Neg
02010134	6.93454	38.1296	2	20-24/01/2023	CDC	Out	An.gambiae	UF		Neg
02010135	6.93454	38.1296	2	20-24/01/2023	CDC	Out	An.gambiae	UF		Neg
02010136	6.93454	38.1296	2	20-24/01/2023	CDC	Out	An.gambiae	UF		Neg
02010137	6.93454	38.1296	2	20-24/01/2023	CDC	Out	An.gambiae	UF		Neg
02010138	6.93454	38.1296	2	20-24/01/2023	CDC	Out	An.gambiae	UF		Neg
02010139	6.93454	38.1296	2	20-24/01/2023	CDC	Out	An.gambiae	UF		Neg
02010140	6.93454	38.1296	2	20-24/01/2023	CDC	Out	An.gambiae	UF		Neg
02010141	6.93454	38.1296	2	20-24/01/2023	CDC	Out	An.gambiae	FF	Goat and Human	Neg	Neg
02020101	6,934230	38.1292	2	20-24/01/2023	CDC	In	An.gambiae	UF		Neg
02020102	6,934230	38.1292	2	20-24/01/2023	CDC	In	An.gambiae	FF	Goat and Human	Neg	Neg
02020103	6,934230	38.1292	2	20-24/01/2023	CDC	In	An.gambiae	UF		Neg
02020104	6,934230	38.1292	2	20-24/01/2023	CDC	In	An.gambiae	UF		Neg
02020105	6,934230	38.1292	2	20-24/01/2023	CDC	In	An.gambiae	UF		Neg
02020106	6,934230	38.1292	2	20-24/01/2023	CDC	In	An.gambiae	UF		Neg
02020107	6,934230	38.1292	2	20-24/01/2023	CDC	In	An.gambiae	UF		Neg
02020108	6,934230	38.1292	2	20-24/01/2023	CDC	In	An.gambiae	UF		Neg
02020109	6,934230	38.1292	2	20-24/01/2023	CDC	In	An.gambiae	UF		Neg
02020110	6,934230	38.1292	2	20-24/01/2023	CDC	In	An.gambiae	UF		Neg
02020111	6,934230	38.1292	2	20-24/01/2023	CDC	In	An.gambiae	UF		Neg
02020112	6,934230	38.1292	2	20-24/01/2023	CDC	In	An.gambiae	UF		Neg
02020113	6,934230	38.1292	2	20-24/01/2023	CDC	In	An.gambiae	UF		Neg
02020114	6,934230	38.1292	2	20-24/01/2023	CDC	In	An.gambiae	UF		Neg
02020115	6,934230	38.1292	2	20-24/01/2023	CDC	In	An.gambiae	UF		Neg
02020116	6,934230	38.1292	2	20-24/01/2023	CDC	In	An.gambiae	UF		Neg
02020117	6,934230	38.1292	2	20-24/01/2023	CDC	In	An.gambiae	UF		Neg
02020118	6,934230	38.1292	2	20-24/01/2023	CDC	In	An.gambiae	UF		Neg
02020119	6,934230	38.1292	2	20-24/01/2023	CDC	In	An.gambiae	UF		Neg
02020120	6,934230	38.1292	2	20-24/01/2023	CDC	In	An.gambiae	UF		Neg
02020121	6,934230	38.1292	2	20-24/01/2023	CDC	In	An.gambiae	UF		Neg
02020122	6,934230	38.1292	2	20-24/01/2023	CDC	In	An.gambiae	UF		Neg
02020123	6,934230	38.1292	2	20-24/01/2023	CDC	In	An.gambiae	UF		Neg
02020124	6,934230	38.1292	2	20-24/01/2023	CDC	In	An.gambiae	UF		Neg
02020125	6,934230	38.1292	2	20-24/01/2023	CDC	In	An.gambiae	UF		Neg
02020126	6,934230	38.1292	2	20-24/01/2023	CDC	In	An.gambiae	HG	Negative	Neg	Neg
02020127	6,934230	38.1292	2	20-24/01/2023	CDC	In	An.gambiae	FF	Goat and Human	Neg	Neg
02020128	6,934230	38.1292	2	20-24/01/2023	CDC	In	An.gambiae	FF	Goat and Human	Neg	Pf
02020129	6,934230	38.1292	2	20-24/01/2023	CDC	In	An.gambiae	FF	Goat and Human	Neg	Pf
02020130	6,934230	38.1292	2	20-24/01/2023	CDC	In	An.gambiae	FF	Human	Neg	Neg
02020131	6,934230	38.1292	2	20-24/01/2023	CDC	Out	An.gambiae	UF		Neg
02030101	6.93411	38.1289	2	20-24/01/2023	CDC	In	An.gambiae	UF		Neg
02030102	6.93411	38.1289	2	20-24/01/2023	CDC	In	An.gambiae	UF		Neg
02030103	6.93411	38.1289	2	20-24/01/2023	CDC	In	An.gambiae	UF		Neg
02030104	6.93411	38.1289	2	20-24/01/2023	CDC	In	An.gambiae	HG	Negative	Neg	Neg
02030105	6.93411	38.1289	2	20-24/01/2023	CDC	In	An.gambiae	UF		Neg
02030106	6.93411	38.1289	2	20-24/01/2023	CDC	In	An.gambiae	UF		Neg
02030107	6.93411	38.1289	2	20-24/01/2023	CDC	In	An.gambiae	UF		Neg
02040101	6,934310	38.1295	2	20-24/01/2023	CDC	In	An.gambiae	UF		Neg
02040102	6,934310	38.1295	2	20-24/01/2023	CDC	In	An.gambiae	UF		Neg
02040103	6,934310	38.1295	2	20-24/01/2023	CDC	In	An.gambiae	HG	Goat and Human	Neg	Neg
02040104	6,934310	38.1295	2	20-24/01/2023	CDC	Out	An.gambiae	UF		Neg
02050101	6.93349	38.1285	2	20-24/01/2023	CDC	In	An.gambiae	UF		Neg
02070201	6.93361	38.1288	2	20-24/01/2023	PSC	In	An.gambiae	UF		Neg
02090201	6.93377	38,129160	2	20-24/01/2023	PSC	In	An.gambiae	FF	Cow	Neg	Neg
02090202	6.93377	38,129160	2	20-24/01/2023	PSC	In	An.gambiae	UF		Neg
02090203	6.93377	38,129160	2	20-24/01/2023	PSC	In	An.gambiae	FF	Cow	Neg	Neg
02100201	6.93474	38.1296	2	20-24/01/2023	PSC	In	An.gambiae	FF	Negative	Neg	Neg
02110101	6.93561	38.1303	2	20-24/01/2023	CDC	In	An.gambiae	UF		Neg
02110102	6.93561	38.1303	2	20-24/01/2023	CDC	In	An.gambiae	UF		Neg
02110103	6.93561	38.1303	2	20-24/01/2023	CDC	In	An.gambiae	UF		Neg
02110104	6.93561	38.1303	2	20-24/01/2023	CDC	In	An.gambiae	UF		Neg
02110105	6.93561	38.1303	2	20-24/01/2023	CDC	In	An.gambiae	UF		Neg
02110106	6.93561	38.1303	2	20-24/01/2023	CDC	In	An.gambiae	UF		Neg
02110107	6.93561	38.1303	2	20-24/01/2023	CDC	In	An.gambiae	HG	Goat and Human	Neg	Pf+Pv
02110108	6.93561	38.1303	2	20-24/01/2023	CDC	In	An.gambiae	UF		Neg
02110109	6.93561	38.1303	2	20-24/01/2023	CDC	Out	An.gambiae	UF		Neg
02110110	6.93561	38.1303	2	20-24/01/2023	CDC	Out	An.gambiae	UF		Neg
02110111	6.93561	38.1303	2	20-24/01/2023	CDC	Out	An.gambiae	UF		Neg
02110112	6.93561	38.1303	2	20-24/01/2023	CDC	Out	An.gambiae	FF	Goat and Human	Neg	Neg
02110113	6.93561	38.1303	2	20-24/01/2023	CDC	Out	An.gambiae	UF		Neg
02110114	6.93561	38.1303	2	20-24/01/2023	CDC	Out	An.gambiae	UF		Neg
02110115	6.93561	38.1303	2	20-24/01/2023	CDC	Out	An.gambiae	UF		Neg
02110116	6.93561	38.1303	2	20-24/01/2023	CDC	Out	An.gambiae	HG	Goat and Cow	Neg	Neg
02110117	6.93561	38.1303	2	20-24/01/2023	CDC	Out	An.gambiae	UF		Neg
02120101	6.93614	38.1301	2	20-24/01/2023	CDC	In	An.gambiae	UF		Neg
02120102	6.93614	38.1301	2	20-24/01/2023	CDC	In	An.gambiae	UF		Neg
02120103	6.93614	38.1301	2	20-24/01/2023	CDC	In	An.gambiae	UF		Neg
02120104	6.93614	38.1301	2	20-24/01/2023	CDC	In	An.gambiae	HG	Human and Sheep	Neg	Neg
02120105	6.93614	38.1301	2	20-24/01/2023	CDC	In	An.gambiae	UF		Neg
02120106	6.93614	38.1301	2	20-24/01/2023	CDC	In	An.gambiae	UF		Neg
02120107	6.93614	38.1301	2	20-24/01/2023	CDC	In	An.gambiae	UF		Neg
02120108	6.93614	38.1301	2	20-24/01/2023	CDC	In	An.gambiae	UF		Neg
02120109	6.93614	38.1301	2	20-24/01/2023	CDC	In	An.gambiae	FF	Goat and Human	Pv-210	Pf+Pv
02120110	6.93614	38.1301	2	20-24/01/2023	CDC	In	An.gambiae	FF	Negative	Neg	Neg
02120111	6.93614	38.1301	2	20-24/01/2023	CDC	In	An.gambiae	FF	Negative	Neg	Neg
02120112	6.93614	38.1301	2	20-24/01/2023	CDC	In	An.gambiae	FF	Human	Neg	Neg
02120113	6.93614	38.1301	2	20-24/01/2023	CDC	Out	An.gambiae	UF		Neg
02120114	6.93614	38.1301	2	20-24/01/2023	CDC	Out	An.gambiae	HG	Negative	Neg	Neg
02120115	6.93614	38.1301	2	20-24/01/2023	CDC	Out	An.gambiae	UF		Neg
02120116	6.93614	38.1301	2	20-24/01/2023	CDC	Out	An.gambiae	FF	Human	Neg	Neg
02120117	6.93614	38.1301	2	20-24/01/2023	CDC	Out	An.gambiae	FF	Human	Neg	Neg
02130101	6,935740	38.131	2	20-24/01/2023	CDC	In	An.gambiae	UF		Neg
02130102	6,935740	38.131	2	20-24/01/2023	CDC	In	An.gambiae	HG	Negative	Neg	Neg
02130103	6,935740	38.131	2	20-24/01/2023	CDC	Out	An.gambiae	UF		Neg
02140101	6,935740	38.1308	2	20-24/01/2023	CDC	In	An.gambiae	HG	Human	Neg	Neg
02140102	6,935740	38.1308	2	20-24/01/2023	CDC	In	An.gambiae	UF		Neg
02140103	6,935740	38.1308	2	20-24/01/2023	CDC	In	An.gambiae	UF		Neg
02140104	6,935740	38.1308	2	20-24/01/2023	CDC	In	An.gambiae	UF		Neg
02140105	6,935740	38.1308	2	20-24/01/2023	CDC	In	An.gambiae	UF		Neg
02140106	6,935740	38.1308	2	20-24/01/2023	CDC	In	An.gambiae	FF	Human and Horse	Neg	Neg
02140107	6,935740	38.1308	2	20-24/01/2023	CDC	In	An.gambiae	FF	Goat and Cow	Neg	Neg
02140108	6,935740	38.1308	2	20-24/01/2023	CDC	In	An.gambiae	UF		Neg
02140109	6,935740	38.1308	2	20-24/01/2023	CDC	In	An.gambiae	FF	Human	Neg	Pv
02150101	6.9355	38,131210	2	20-24/01/2023	CDC	In	An.gambiae	UF		Neg
02150102	6.9355	38,131210	2	20-24/01/2023	CDC	In	An.gambiae	UF		Neg
02150103	6.9355	38,131210	2	20-24/01/2023	CDC	In	An.gambiae	FF	Human	Neg	Pf
02150104	6.9355	38,131210	2	20-24/01/2023	CDC	In	An.gambiae	UF		Neg
02150105	6.9355	38,131210	2	20-24/01/2023	CDC	In	An.gambiae	UF		Neg
02150106	6.9355	38,131210	2	20-24/01/2023	CDC	In	An.gambiae	FF	Goat and Human	Neg	Pf
02150107	6.9355	38,131210	2	20-24/01/2023	CDC	In	An.gambiae	UF		Neg
02150108	6.9355	38,131210	2	20-24/01/2023	CDC	In	An.gambiae	UF		Neg
02150109	6.9355	38,131210	2	20-24/01/2023	CDC	In	An.gambiae	UF		Neg
02150110	6.9355	38,131210	2	20-24/01/2023	CDC	In	An.gambiae	UF		Neg
02150111	6.9355	38,131210	2	20-24/01/2023	CDC	In	An.gambiae	UF		Neg
02150112	6.9355	38,131210	2	20-24/01/2023	CDC	In	An.gambiae	UF		Neg
02150113	6.9355	38,131210	2	20-24/01/2023	CDC	In	An.gambiae	UF		Neg
02150114	6.9355	38,131210	2	20-24/01/2023	CDC	In	An.gambiae	UF		Neg
02150115	6.9355	38,131210	2	20-24/01/2023	CDC	In	An.gambiae	UF		Neg
02150116	6.9355	38,131210	2	20-24/01/2023	CDC	In	An.gambiae	UF		Neg
02150117	6.9355	38,131210	2	20-24/01/2023	CDC	In	An.gambiae	UF		Neg
02150118	6.9355	38,131210	2	20-24/01/2023	CDC	In	An.gambiae	UF		Neg
02150119	6.9355	38,131210	2	20-24/01/2023	CDC	In	An.gambiae	UF		Neg
02150120	6.9355	38,131210	2	20-24/01/2023	CDC	In	An.gambiae	UF		Neg
02150121	6.9355	38,131210	2	20-24/01/2023	CDC	In	An.gambiae	UF		Neg
02150122	6.9355	38,131210	2	20-24/01/2023	CDC	In	An.gambiae	UF		Neg
02150123	6.9355	38,131210	2	20-24/01/2023	CDC	In	An.gambiae	UF		Neg
02150124	6.9355	38,131210	2	20-24/01/2023	CDC	In	An.gambiae	UF		Neg
02150125	6.9355	38,131210	2	20-24/01/2023	CDC	In	An.gambiae	HG	Human	Neg	Pf
02150126	6.9355	38,131210	2	20-24/01/2023	CDC	In	An.gambiae	UF		Neg
02150127	6.9355	38,131210	2	20-24/01/2023	CDC	In	An.gambiae	UF		Neg
02150128	6.9355	38,131210	2	20-24/01/2023	CDC	In	An.gambiae	UF		Neg
02150129	6.9355	38,131210	2	20-24/01/2023	CDC	In	An.gambiae	FF	Goat and Human	Neg	Pf
02150130	6.9355	38,131210	2	20-24/01/2023	CDC	In	An.gambiae	UF		Neg
02150131	6.9355	38,131210	2	20-24/01/2023	CDC	In	An.gambiae	FF	Human	Neg	Neg
02150132	6.9355	38,131210	2	20-24/01/2023	CDC	In	An.gambiae	FF	Goat and Human	Neg	Pf
02150133	6.9355	38,131210	2	20-24/01/2023	CDC	In	An.gambiae	FF	Goat and Human	Neg	Neg
02150134	6.9355	38,131210	2	20-24/01/2023	CDC	In	An.gambiae	FF	Goat and Human	Neg	Pf
02150135	6.9355	38,131210	2	20-24/01/2023	CDC	In	An.gambiae	FF	Goat and Human	Neg	Pf
02150136	6.9355	38,131210	2	20-24/01/2023	CDC	In	An.gambiae	UF		Neg
02150137	6.9355	38,131210	2	20-24/01/2023	CDC	In	An.gambiae	FF	Goat and Human	Neg	Pf
02150138	6.9355	38,131210	2	20-24/01/2023	CDC	In	An.gambiae	FF	Goat and Human	Neg	Pf
02150139	6.9355	38,131210	2	20-24/01/2023	CDC	In	An.gambiae	FF	Goat and Human	Neg	Pf+Pv
02150140	6.9355	38,131210	2	20-24/01/2023	CDC	In	An.gambiae	FF	Negative	Neg	Neg
02150141	6.9355	38,131210	2	20-24/01/2023	CDC	In	An.gambiae	HG	Human	Neg	Pf
02150142	6.9355	38,131210	2	20-24/01/2023	CDC	In	An.gambiae	FF	Goat and Human	Neg	Neg
02150143	6.9355	38,131210	2	20-24/01/2023	CDC	In	An.gambiae	FF	Human	Neg	Pv
02150144	6.9355	38,131210	2	20-24/01/2023	CDC	In	An.gambiae	FF	Goat and Human	Neg	Pv
02150145	6.9355	38,131210	2	20-24/01/2023	CDC	In	An.gambiae	FF	Goat and Human	Neg	Pf
02150146	6.9355	38,131210	2	20-24/01/2023	CDC	Out	An.gambiae	UF		Neg
02160201	6.93537	38.1311	2	20-24/01/2023	PSC	In	An.gambiae	UF		Neg
02160202	6.93537	38.1311	2	20-24/01/2023	PSC	In	An.gambiae	FF	Goat and Human	Neg	Neg
02180201	6.93565	38.1311	2	20-24/01/2023	PSC	In	An.gambiae	UF		Neg
02180202	6.93565	38.1311	2	20-24/01/2023	PSC	In	An.gambiae	UF		Neg
02190201	6.93619	38.1299	2	20-24/01/2023	PSC	In	An.gambiae	UF		Neg
02190202	6.93619	38.1299	2	20-24/01/2023	PSC	In	An.gambiae	UF		Neg
02190203	6.93619	38.1299	2	20-24/01/2023	PSC	In	An.gambiae	FF	Human	Neg	Pf
02190204	6.93619	38.1299	2	20-24/01/2023	PSC	In	An.gambiae	FF	Negative	Neg	Neg
02190205	6.93619	38.1299	2	20-24/01/2023	PSC	In	An.gambiae	HG	Human	Neg	Neg
02190206	6.93619	38.1299	2	20-24/01/2023	PSC	In	An.gambiae	FF	Goat and Human	Neg	Neg
02200201	6.93578	38.1304	2	20-24/01/2023	PSC	In	An.gambiae	UF		Neg
02010101	6.93454	38.1296	3	28-30/03/2023	CDC	In	An.gambiae	UF		Neg
02080201	6.93349	38.128	3	28-30/03/2023	PSC	In	An.gambiae	FF	Goat and Human	Neg	Pf+Pv
02080202	6.93349	38.128	3	28-30/03/2023	PSC	In	An.gambiae	UF		Neg
02100201	6.93474	38.1296	3	28-30/03/2023	PSC	In	An.gambiae	UF		Neg
02100202	6.93474	38.1296	3	28-30/03/2023	PSC	In	An.gambiae	FF	Goat and Human	Neg	Neg
02130101	6,935740	38.131	3	28-30/03/2023	CDC	In	An.gambiae	UF		Neg
02130102	6,935740	38.131	3	28-30/03/2023	CDC	In	An.gambiae	UF		Neg
02140101	6,935480	38.1308	3	28-30/03/2023	CDC	Out	An.gambiae	UF		Neg
02140102	6,935480	38.1308	3	28-30/03/2023	CDC	Out	An.gambiae	UF		Neg
02160201	6.93537	38.1311	3	28-30/03/2023	PSC	In	An.gambiae	UF		Neg
02180201	6.93565	38.1311	3	28-30/03/2023	PSC	In	An.gambiae	FF	Goat and Human	Neg	Neg
02180202	6.93565	38.1311	3	28-30/03/2023	PSC	In	An.gambiae	FF	Goat and Human	Neg	Neg
02190201	6.93619	38.1299	3	28-30/03/2023	PSC	In	An.gambiae	HG	Negative	Neg	Neg
02010101	6.93454	38.1296	4	28-31/05/2023	CDC	In	An.gambiae	UF		Neg
02010102	6.93454	38.1296	4	28-31/05/2023	CDC	In	An.gambiae	UF		Neg
02010103	6.93454	38.1296	4	28-31/05/2023	CDC	In	An.gambiae	UF		Neg
02010104	6.93454	38.1296	4	28-31/05/2023	CDC	In	An.gambiae	UF		Neg
02010105	6.93454	38.1296	4	28-31/05/2023	CDC	In	An.gambiae	UF		Neg
02010106	6.93454	38.1296	4	28-31/05/2023	CDC	In	An.gambiae	UF		Neg
02010107	6.93454	38.1296	4	28-31/05/2023	CDC	In	An.gambiae	UF		Neg
02010108	6.93454	38.1296	4	28-31/05/2023	CDC	In	An.gambiae	UF		Neg
02010109	6.93454	38.1296	4	28-31/05/2023	CDC	In	An.gambiae	UF		Neg
02010110	6.93454	38.1296	4	28-31/05/2023	CDC	In	An.gambiae	UF		Neg
02010111	6.93454	38.1296	4	28-31/05/2023	CDC	In	An.gambiae	UF		Neg
02010112	6.93454	38.1296	4	28-31/05/2023	CDC	In	An.gambiae	UF		Neg
02010113	6.93454	38.1296	4	28-31/05/2023	CDC	In	An.gambiae	UF		Neg
02010114	6.93454	38.1296	4	28-31/05/2023	CDC	In	An.gambiae	UF		Neg
02010115	6.93454	38.1296	4	28-31/05/2023	CDC	In	An.gambiae	HG	Goat and Human	Neg	Neg
02010116	6.93454	38.1296	4	28-31/05/2023	CDC	In	An.gambiae	UF		Neg
02010117	6.93454	38.1296	4	28-31/05/2023	CDC	In	An.gambiae	UF		Neg
02010118	6.93454	38.1296	4	28-31/05/2023	CDC	In	An.gambiae	UF		Neg
02010119	6.93454	38.1296	4	28-31/05/2023	CDC	In	An.gambiae	UF		Neg
02010120	6.93454	38.1296	4	28-31/05/2023	CDC	In	An.gambiae	UF		Neg
02010121	6.93454	38.1296	4	28-31/05/2023	CDC	In	An.gambiae	UF		Neg
02010122	6.93454	38.1296	4	28-31/05/2023	CDC	In	An.gambiae	UF		Neg
02010123	6.93454	38.1296	4	28-31/05/2023	CDC	In	An.gambiae	UF		Neg
02010124	6.93454	38.1296	4	28-31/05/2023	CDC	In	An.gambiae	UF		Neg
02010125	6.93454	38.1296	4	28-31/05/2023	CDC	In	An.gambiae	UF		Neg
02010126	6.93454	38.1296	4	28-31/05/2023	CDC	In	An.gambiae	UF		Neg
02010127	6.93454	38.1296	4	28-31/05/2023	CDC	In	An.gambiae	FF	Human	Neg	Pv
02010128	6.93454	38.1296	4	28-31/05/2023	CDC	In	An.gambiae	FF	Cow	Neg	Neg
02010129	6.93454	38.1296	4	28-31/05/2023	CDC	In	An.gambiae	FF	Cow	Neg	Neg
02010130	6.93454	38.1296	4	28-31/05/2023	CDC	In	An.gambiae	FF	Human	Neg	Neg
02010131	6.93454	38.1296	4	28-31/05/2023	CDC	In	An.gambiae	FF	Human	Neg	Neg
02010132	6.93454	38.1296	4	28-31/05/2023	CDC	In	An.gambiae	UF		Neg
02010133	6.93454	38.1296	4	28-31/05/2023	CDC	In	An.gambiae	FF	Human	Neg	Neg
02010134	6.93454	38.1296	4	28-31/05/2023	CDC	In	An.gambiae	FF	Human	Neg	Neg
02010135	6.93454	38.1296	4	28-31/05/2023	CDC	In	An.gambiae	FF	Cow	Neg	Neg
02010136	6.93454	38.1296	4	28-31/05/2023	CDC	In	An.gambiae	UF		Neg
02010137	6.93454	38.1296	4	28-31/05/2023	CDC	Out	An.gambiae	UF		Neg
02010138	6.93454	38.1296	4	28-31/05/2023	CDC	Out	An.gambiae	UF		Neg
02010139	6.93454	38.1296	4	28-31/05/2023	CDC	Out	An.gambiae	UF		Neg
02020101	6,934230	38.1292	4	28-31/05/2023	CDC	In	An.gambiae	UF		Neg
02020102	6,934230	38.1292	4	28-31/05/2023	CDC	In	An.gambiae	UF		Neg
02020103	6,934230	38.1292	4	28-31/05/2023	CDC	In	An.gambiae	UF		Neg
02020104	6,934230	38.1292	4	28-31/05/2023	CDC	In	An.gambiae	UF		Neg
02020105	6,934230	38.1292	4	28-31/05/2023	CDC	In	An.gambiae	UF		Neg
02020106	6,934230	38.1292	4	28-31/05/2023	CDC	In	An.gambiae	UF		Neg
02020107	6,934230	38.1292	4	28-31/05/2023	CDC	In	An.gambiae	UF		Neg
02020108	6,934230	38.1292	4	28-31/05/2023	CDC	In	An.gambiae	UF		Neg
02020109	6,934230	38.1292	4	28-31/05/2023	CDC	In	An.gambiae	UF		Neg
02020110	6,934230	38.1292	4	28-31/05/2023	CDC	In	An.gambiae	UF		Neg
02020111	6,934230	38.1292	4	28-31/05/2023	CDC	In	An.gambiae	UF		Neg
02020112	6,934230	38.1292	4	28-31/05/2023	CDC	In	An.gambiae	UF		Neg
02020113	6,934230	38.1292	4	28-31/05/2023	CDC	In	An.gambiae	UF		Neg
02020114	6,934230	38.1292	4	28-31/05/2023	CDC	In	An.gambiae	UF		Neg
02020115	6,934230	38.1292	4	28-31/05/2023	CDC	In	An.gambiae	UF		Neg
02020116	6,934230	38.1292	4	28-31/05/2023	CDC	In	An.gambiae	UF		Neg
02020117	6,934230	38.1292	4	28-31/05/2023	CDC	In	An.gambiae	UF		Neg
02020118	6,934230	38.1292	4	28-31/05/2023	CDC	In	An.gambiae	UF		Neg
02020119	6,934230	38.1292	4	28-31/05/2023	CDC	In	An.gambiae	UF		Neg
02020120	6,934230	38.1292	4	28-31/05/2023	CDC	In	An.gambiae	UF		Neg
02020121	6,934230	38.1292	4	28-31/05/2023	CDC	In	An.gambiae	UF		Neg
02020122	6,934230	38.1292	4	28-31/05/2023	CDC	In	An.gambiae	UF		Neg
02020123	6,934230	38.1292	4	28-31/05/2023	CDC	In	An.gambiae	UF		Neg
02020124	6,934230	38.1292	4	28-31/05/2023	CDC	In	An.gambiae	UF		Neg
02020125	6,934230	38.1292	4	28-31/05/2023	CDC	In	An.gambiae	UF		Neg
02020126	6,934230	38.1292	4	28-31/05/2023	CDC	In	An.gambiae	UF		Neg
02020127	6,934230	38.1292	4	28-31/05/2023	CDC	In	An.gambiae	UF		Neg
02020128	6,934230	38.1292	4	28-31/05/2023	CDC	In	An.gambiae	UF		Neg
02020129	6,934230	38.1292	4	28-31/05/2023	CDC	In	An.gambiae	UF		Neg
02020130	6,934230	38.1292	4	28-31/05/2023	CDC	In	An.gambiae	UF		Neg
02020131	6,934230	38.1292	4	28-31/05/2023	CDC	In	An.gambiae	UF		Neg
02020132	6,934230	38.1292	4	28-31/05/2023	CDC	In	An.gambiae	UF		Neg
02020133	6,934230	38.1292	4	28-31/05/2023	CDC	In	An.gambiae	UF		Neg
02020134	6,934230	38.1292	4	28-31/05/2023	CDC	In	An.gambiae	UF		Neg
02020135	6,934230	38.1292	4	28-31/05/2023	CDC	In	An.gambiae	UF		Neg
02020136	6,934230	38.1292	4	28-31/05/2023	CDC	In	An.gambiae	UF		Neg
02020137	6,934230	38.1292	4	28-31/05/2023	CDC	In	An.gambiae	UF		Neg
02020138	6,934230	38.1292	4	28-31/05/2023	CDC	In	An.gambiae	UF		Neg
02020139	6,934230	38.1292	4	28-31/05/2023	CDC	In	An.gambiae	UF		Neg
02020140	6,934230	38.1292	4	28-31/05/2023	CDC	In	An.gambiae	FF	Goat and Human	Neg	Neg
02020141	6,934230	38.1292	4	28-31/05/2023	CDC	In	An.gambiae	HG	Negative	Neg	Neg
02020142	6,934230	38.1292	4	28-31/05/2023	CDC	In	An.gambiae	FF	Goat and Human	Neg	Neg
02020143	6,934230	38.1292	4	28-31/05/2023	CDC	In	An.gambiae	UF		Neg
02020144	6,934230	38.1292	4	28-31/05/2023	CDC	Out	An.gambiae	UF		Neg
02030101	6.93411	38.1289	4	28-31/05/2023	CDC	In	An.gambiae	UF		Neg
02030102	6.93411	38.1289	4	28-31/05/2023	CDC	In	An.gambiae	HG	Goat	Pf	Neg
02030103	6.93411	38.1289	4	28-31/05/2023	CDC	Out	An.gambiae	FF	Cow	Neg	Neg
02030104	6.93411	38.1289	4	28-31/05/2023	CDC	Out	An.gambiae	UF		Neg
02030105	6.93411	38.1289	4	28-31/05/2023	CDC	Out	An.gambiae	UF		Neg
02040101	6,934310	38.1295	4	28-31/05/2023	CDC	In	An.gambiae	UF		Neg
02040102	6,934310	38.1295	4	28-31/05/2023	CDC	In	An.gambiae	UF		Neg
02040103	6,934310	38.1295	4	28-31/05/2023	CDC	In	An.gambiae	UF		Neg
02040104	6,934310	38.1295	4	28-31/05/2023	CDC	In	An.gambiae	UF		Neg
02040105	6,934310	38.1295	4	28-31/05/2023	CDC	In	An.gambiae	UF		Neg
02040106	6,934310	38.1295	4	28-31/05/2023	CDC	In	An.gambiae	UF		Neg
02040107	6,934310	38.1295	4	28-31/05/2023	CDC	In	An.gambiae	FF	Human	Neg	Neg
02040108	6,934310	38.1295	4	28-31/05/2023	CDC	In	An.gambiae	FF	Human	Neg	Neg
02040109	6,934310	38.1295	4	28-31/05/2023	CDC	Out	An.gambiae	UF		Neg
02040110	6,934310	38.1295	4	28-31/05/2023	CDC	Out	An.gambiae	UF		Neg
02040111	6,934310	38.1295	4	28-31/05/2023	CDC	Out	An.gambiae	UF		Neg
02040112	6,934310	38.1295	4	28-31/05/2023	CDC	Out	An.gambiae	FF	Goat and Human	Neg	Neg
02050101	6.93349	38.1285	4	28-31/05/2023	CDC	In	An.gambiae	UF		Neg
02050102	6.93349	38.1285	4	28-31/05/2023	CDC	In	An.gambiae	UF		Neg
02050103	6.93349	38.1285	4	28-31/05/2023	CDC	In	An.gambiae	UF		Neg
02050104	6.93349	38.1285	4	28-31/05/2023	CDC	In	An.gambiae	UF		Neg
02050105	6.93349	38.1285	4	28-31/05/2023	CDC	In	An.gambiae	UF		Neg
02050106	6.93349	38.1285	4	28-31/05/2023	CDC	In	An.gambiae	UF		Neg
02050107	6.93349	38.1285	4	28-31/05/2023	CDC	In	An.gambiae	FF	Goat and Human	Neg	Neg
02050108	6.93349	38.1285	4	28-31/05/2023	CDC	In	An.gambiae	FF	Human	Neg	Neg
02050109	6.93349	38.1285	4	28-31/05/2023	CDC	In	An.gambiae	FF	Goat and Human	Neg	Neg
02050110	6.93349	38.1285	4	28-31/05/2023	CDC	In	An.gambiae	FF	Goat and Human	Neg	Pf+Pv
02050111	6.93349	38.1285	4	28-31/05/2023	CDC	Out	An.gambiae	UF		Neg
02060201	6,933877	38.1288	4	28-31/05/2023	PSC	In	An.gambiae	UF		Neg
02060202	6,933877	38.1288	4	28-31/05/2023	PSC	In	An.gambiae	UF		Neg
02060203	6,933877	38.1288	4	28-31/05/2023	PSC	In	An.gambiae	FF	Cow	Neg	Neg
02070201	6.93361	38.1288	4	28-31/05/2023	PSC	In	An.gambiae	UF		Neg
02070202	6.93361	38.1288	4	28-31/05/2023	PSC	In	An.gambiae	FF	Cow	Neg	Neg
02080201	6.93349	38.128	4	28-31/05/2023	PSC	In	An.gambiae	FF	Goat and Human	Neg	Neg
02090201	6.93377	38,129160	4	28-31/05/2023	PSC	In	An.gambiae	UF		Neg
02090202	6.93377	38,129160	4	28-31/05/2023	PSC	In	An.gambiae	FF	Goat and Human	Neg	Neg
02100201	6.93474	38.1296	4	28-31/05/2023	PSC	In	An.gambiae	FF	Goat and Human	Neg	Neg
02100202	6.93474	38.1296	4	28-31/05/2023	PSC	In	An.gambiae	FF	Goat and Cow	Neg	Neg
02110101	6.93561	38.1303	4	28-31/05/2023	CDC	In	An.gambiae	FF	Goat and Human	Neg	Neg
02110102	6.93561	38.1303	4	28-31/05/2023	CDC	Out	An.gambiae	UF		Neg
02120101	6.93614	38.1301	4	28-31/05/2023	CDC	In	An.gambiae	HG	Human	Neg	Neg
02120102	6.93614	38.1301	4	28-31/05/2023	CDC	In	An.gambiae	UF		Neg
02120103	6.93614	38.1301	4	28-31/05/2023	CDC	In	An.gambiae	FF	Human	Neg	Neg
02120104	6.93614	38.1301	4	28-31/05/2023	CDC	In	An.gambiae	FF	Human	Neg	Neg
02120105	6.93614	38.1301	4	28-31/05/2023	CDC	Out	An.gambiae	FF	Negative	Neg	Neg
02120106	6.93614	38.1301	4	28-31/05/2023	CDC	Out	An.gambiae	UF		Neg
02130101	6,935740	38.131	4	28-31/05/2023	CDC	In	An.gambiae	FF	Goat and Human	Neg	Pf+Pv
02140101	6,935480	38.1308	4	28-31/05/2023	CDC	In	An.gambiae	UF		Neg
02150101	6.9355	38,131210	4	28-31/05/2023	CDC	In	An.gambiae	UF		Neg
02150102	6.9355	38,131210	4	28-31/05/2023	CDC	In	An.gambiae	FF	Human	Neg	Pf
02150103	6.9355	38,131210	4	28-31/05/2023	CDC	Out	An.gambiae	UF		Neg
02190201	6.93619	38.1299	4	28-31/05/2023	PSC	In	An.gambiae	FF	Goat and Human	Neg	Neg
02010101	6.93454	38.1296	5	21-23/08/2023	CDC	In	An.gambiae	FF	Goat and Human	Neg	Neg
02010102	6.93454	38.1296	5	21-23/08/2023	CDC	In	An.gambiae	UF		Neg
02010103	6.93454	38.1296	5	21-23/08/2023	CDC	In	An.gambiae	FF	Goat and Human	Neg	Neg
02010104	6.93454	38.1296	5	21-23/08/2023	CDC	In	An.gambiae	FF	Negative	Neg	Neg
02010105	6.93454	38.1296	5	21-23/08/2023	CDC	In	An.gambiae	FF	Goat and Human	Neg	Neg
02010106	6.93454	38.1296	5	21-23/08/2023	CDC	In	An.gambiae	FF	Human	Neg	Neg
02010107	6.93454	38.1296	5	21-23/08/2023	CDC	In	An.gambiae	FF	Goat and Human	Neg	Neg
02010108	6.93454	38.1296	5	21-23/08/2023	CDC	In	An.gambiae	UF		Neg
02010109	6.93454	38.1296	5	21-23/08/2023	CDC	Out	An.gambiae	UF		Neg
02010110	6.93454	38.1296	5	21-23/08/2023	CDC	Out	An.gambiae	UF		Neg
02010111	6.93454	38.1296	5	21-23/08/2023	CDC	Out	An.gambiae	UF		Neg
02010112	6.93454	38.1296	5	21-23/08/2023	CDC	Out	An.gambiae	UF		Neg
02010113	6.93454	38.1296	5	21-23/08/2023	CDC	Out	An.gambiae	UF		Neg
02020101	6,934230	38.1292	5	21-23/08/2023	CDC	In	An.gambiae	UF		Neg
02020102	6,934230	38.1292	5	21-23/08/2023	CDC	In	An.gambiae	UF		Neg
02020103	6,934230	38.1292	5	21-23/08/2023	CDC	In	An.gambiae	UF		Neg
02020104	6,934230	38.1292	5	21-23/08/2023	CDC	In	An.gambiae	UF		Neg
02020105	6,934230	38.1292	5	21-23/08/2023	CDC	In	An.gambiae	UF		Neg
02020106	6,934230	38.1292	5	21-23/08/2023	CDC	In	An.gambiae	UF		Neg
02020107	6,934230	38.1292	5	21-23/08/2023	CDC	In	An.gambiae	UF		Neg
02020108	6,934230	38.1292	5	21-23/08/2023	CDC	In	An.gambiae	UF		Neg
02020109	6,934230	38.1292	5	21-23/08/2023	CDC	In	An.gambiae	HG	Human	Neg	Pf
02020110	6,934230	38.1292	5	21-23/08/2023	CDC	In	An.gambiae	UF		Neg
02020111	6,934230	38.1292	5	21-23/08/2023	CDC	In	An.gambiae	UF		Neg
02020112	6,934230	38.1292	5	21-23/08/2023	CDC	In	An.gambiae	UF		Neg
02020113	6,934230	38.1292	5	21-23/08/2023	CDC	In	An.gambiae	HG	Goat and Human	Neg	Neg
02020114	6,934230	38.1292	5	21-23/08/2023	CDC	In	An.gambiae	UF		Neg
02020115	6,934230	38.1292	5	21-23/08/2023	CDC	In	An.gambiae	UF		Neg
02020116	6,934230	38.1292	5	21-23/08/2023	CDC	In	An.gambiae	UF		Neg
02020117	6,934230	38.1292	5	21-23/08/2023	CDC	In	An.gambiae	UF		Neg
02020118	6,934230	38.1292	5	21-23/08/2023	CDC	In	An.gambiae	UF		Neg
02020119	6,934230	38.1292	5	21-23/08/2023	CDC	In	An.gambiae	UF		Neg
02020120	6,934230	38.1292	5	21-23/08/2023	CDC	In	An.gambiae	UF		Neg
02020121	6,934230	38.1292	5	21-23/08/2023	CDC	In	An.gambiae	UF		Neg
02020122	6,934230	38.1292	5	21-23/08/2023	CDC	In	An.gambiae	UF		Neg
02020123	6,934230	38.1292	5	21-23/08/2023	CDC	In	An.gambiae	UF		Neg
02020124	6,934230	38.1292	5	21-23/08/2023	CDC	In	An.gambiae	HG	Negative	Neg	Neg
02020125	6,934230	38.1292	5	21-23/08/2023	CDC	In	An.gambiae	FF	Human	Neg	Neg
02020126	6,934230	38.1292	5	21-23/08/2023	CDC	In	An.gambiae	FF	Negative	Neg	Pf
02020127	6,934230	38.1292	5	21-23/08/2023	CDC	In	An.gambiae	FF	Goat and Human	Neg	Neg
02040101	6,934310	38.1295	5	21-23/08/2023	CDC	Out	An.gambiae	UF		Neg
02050101	6.93349	38.1285	5	21-23/08/2023	CDC	Out	An.gambiae	UF		Neg
02050102	6.93349	38.1285	5	21-23/08/2023	CDC	Out	An.gambiae	UF		Neg
02050103	6.93349	38.1285	5	21-23/08/2023	CDC	Out	An.gambiae	UF		Neg
02050104	6.93349	38.1285	5	21-23/08/2023	CDC	Out	An.gambiae	UF		Neg
02050105	6.93349	38.1285	5	21-23/08/2023	CDC	Out	An.gambiae	UF		Neg
02050106	6.93349	38.1285	5	21-23/08/2023	CDC	Out	An.gambiae	UF		Neg
02050107	6.93349	38.1285	5	21-23/08/2023	CDC	Out	An.gambiae	UF		Neg
02050108	6.93349	38.1285	5	21-23/08/2023	CDC	Out	An.gambiae	UF		Neg
02050109	6.93349	38.1285	5	21-23/08/2023	CDC	Out	An.gambiae	UF		Neg
02110101	6.93561	38.1303	5	21-23/08/2023	CDC	In	An.gambiae	FF	Cow	Neg	Neg
02110102	6.93561	38.1303	5	21-23/08/2023	CDC	In	An.gambiae	FF	Cow	Neg	Neg
02110103	6.93561	38.1303	5	21-23/08/2023	CDC	In	An.gambiae	FF	Cow	Neg	Neg
02110104	6.93561	38.1303	5	21-23/08/2023	CDC	In	An.gambiae	UF		Neg
02110105	6.93561	38.1303	5	21-23/08/2023	CDC	In	An.gambiae	UF		Neg
02110106	6.93561	38.1303	5	21-23/08/2023	CDC	In	An.gambiae	UF		Neg
02110107	6.93561	38.1303	5	21-23/08/2023	CDC	In	An.gambiae	UF		Neg
02110108	6.93561	38.1303	5	21-23/08/2023	CDC	In	An.gambiae	UF		Neg
02110109	6.93561	38.1303	5	21-23/08/2023	CDC	Out	An.gambiae	UF		Neg
02110110	6.93561	38.1303	5	21-23/08/2023	CDC	Out	An.gambiae	UF		Neg
02110111	6.93561	38.1303	5	21-23/08/2023	CDC	Out	An.gambiae	UF		Neg
02110112	6.93561	38.1303	5	21-23/08/2023	CDC	Out	An.gambiae	UF		Neg
02130101	6,935740	38.131	5	21-23/08/2023	CDC	In	An.gambiae	FF	Goat and Human	Neg	Neg
02130102	6,935740	38.131	5	21-23/08/2023	CDC	In	An.gambiae	FF	Negative	Neg	Neg
02130103	6,935740	38.131	5	21-23/08/2023	CDC	In	An.gambiae	UF		Neg
02130104	6,935740	38.131	5	21-23/08/2023	CDC	In	An.gambiae	UF		Neg
02130105	6,935740	38.131	5	21-23/08/2023	CDC	In	An.gambiae	UF		Neg
02130106	6,935740	38.131	5	21-23/08/2023	CDC	In	An.gambiae	UF		Neg
02130107	6,935740	38.131	5	21-23/08/2023	CDC	In	An.gambiae	UF		Neg
03180101	6,032420	37,567800	1	30-03/04/2022	CDC	Out	An.gambiae	UF		Neg
03180102	6,032420	37,567800	1	30-03/04/2023	CDC	Out	An.gambiae	UF		Neg
03190101	6,032390	37,567220	1	30-03/04/2024	CDC	Out	An. parensis	UF		Neg
03190102	6,032390	37,567220	1	30-03/04/2025	CDC	Out	An.gambiae	UF		Neg
03130101	6,004070	37,535990	2	22-26/10/2022	CDC	In	An.gambiae	UF		Neg
03140101	6,004020	37,536360	2	22-26/10/2022	CDC	In	An.gambiae	FF	Goat and Human	Neg	Neg
03180101	6,004020	37,567800	2	22-26/10/2022	CDC	In	An.gambiae	HG	Human	Neg	Neg
03180102	6,004020	37,567800	2	22-26/10/2022	CDC	In	An.gambiae	HG	Human	Neg	Neg
03190101	6,032390	37,567220	2	22-26/10/2022	CDC	In	An.gambiae	UF		Neg
03190102	6,032390	37,567220	2	22-26/10/2022	CDC	In	An.gambiae	FF	Goat and Human	Neg	Neg
03190103	6,032390	37,567220	2	22-26/10/2022	CDC	Out	An.gambiae	FF	Goat and Human	Neg	Neg
03200101	6,032390	37,567800	2	22-26/10/2022	CDC	Out	An.gambiae	UF		Neg
03200102	6,032390	37,567800	2	22-26/10/2022	CDC	Out	An.gambiae	UF		Neg
03200103	6,032390	37,567800	2	22-26/10/2022	CDC	Out	An.gambiae	UF		Neg
03210101	6,032390	37,567220	2	22-26/10/2022	CDC	In	An.gambiae	UF		Neg
03210102	6,032390	37,567220	2	22-26/10/2022	CDC	In	An.gambiae	UF		Neg
03210103	6,032390	37,567220	2	22-26/10/2022	CDC	In	An.gambiae	UF		Neg
03210104	6,032390	37,567220	2	22-26/10/2022	CDC	In	An.gambiae	UF		Neg
03210105	6,032390	37,567220	2	22-26/10/2022	CDC	In	An.gambiae	UF		Neg
03210106	6,032390	37,567220	2	22-26/10/2022	CDC	In	An.gambiae	UF		Neg
03210107	6,032390	37,567220	2	22-26/10/2022	CDC	In	An.gambiae	UF		Neg
03210108	6,032390	37,567220	2	22-26/10/2022	CDC	In	An.gambiae	UF		Neg
03210109	6,032390	37,567220	2	22-26/10/2022	CDC	In	An.gambiae	UF		Neg
03210110	6,032390	37,567220	2	22-26/10/2022	CDC	In	An.gambiae	UF		Neg
03210111	6,032390	37,567220	2	22-26/10/2022	CDC	In	An.gambiae	UF		Neg
03210112	6,032390	37,567220	2	22-26/10/2022	CDC	Out	An.gambiae	UF		Neg
03210113	6,032390	37,567220	2	22-26/10/2022	CDC	Out	An.gambiae	UF		Neg
03180101	6,032420	37,567800	5	13-15/06/2023	CDC	In	An.gambiae	UF		Neg
03180102	6,032420	37,567800	5	13-15/06/2023	CDC	In	An.gambiae	UF		Neg
03180103	6,032420	37,567800	5	13-15/06/2023	CDC	In	An.gambiae	UF		Neg
03180104	6,032420	37,567800	5	13-15/06/2023	CDC	Out	An.gambiae	FF	Goat and Human	Neg	Neg
03180105	6,032420	37,567800	5	13-15/06/2023	CDC	Out	An.gambiae	FF	Goat and Human	Neg	Neg
03190101	6,032390	37,567220	5	13-15/06/2023	CDC	In	An.gambiae	UF		Neg
03190102	6,032390	37,567220	5	13-15/06/2023	CDC	Out	An.gambiae	UF		Neg
03190103	6,032390	37,567220	5	13-15/06/2023	CDC	Out	An.gambiae	UF		Neg
03200101	6,032240	37,567800	5	13-15/06/2023	CDC	In	An.gambiae	UF		Neg
03200102	6,032240	37,567800	5	13-15/06/2023	CDC	In	An.gambiae	UF		Neg
03200103	6,032240	37,567800	5	13-15/06/2023	CDC	In	An.gambiae	UF		Neg
03200104	6,032240	37,567800	5	13-15/06/2023	CDC	In	An.gambiae	UF		Neg
03200105	6,032240	37,567800	5	13-15/06/2023	CDC	In	An.gambiae	UF		Neg
03200106	6,032240	37,567800	5	13-15/06/2023	CDC	In	An.gambiae	FF	Goat and Human	Neg	Neg
03200107	6,032240	37,567800	5	13-15/06/2023	CDC	In	An.gambiae	UF		Neg
03200108	6,032240	37,567800	5	13-15/06/2023	CDC	Out	An.gambiae	UF		Neg
03210101	6,032390	37,567220	5	13-15/06/2023	CDC	In	An.gambiae	UF		Neg
03210102	6,032390	37,567220	5	13-15/06/2023	CDC	In	An.gambiae	UF		Neg
04010101	4.80211	36.0489	1	04-06/06/2022	CDC	Out	An.gambiae	HG	Goat and Human	Neg	Neg
04020101	4.80092	36.0488	4	03-04/04/2023	CDC	In	An.gambiae	UF		Neg
04020102	4.80092	36.0488	4	03-04/04/2023	CDC	In	An.gambiae	UF		Neg
04050201	4.80292	36.0503	4	03-04/04/2023	PSC	In	An.gambiae	UF		Neg
04090201	4.8008	36.0507	4	03-04/04/2023	PSC	In	An.gambiae	UF		Neg
04110201	4,802560	36,049960	4	03-04/04/2023	PSC	In	An.gambiae	UF		Neg
04060201	4.80074	36.0506	5	05-08/06/2023	PSC	In	An.gambiae	UF		Neg
04060202	4.80074	36.0506	5	05-08/06/2023	PSC	In	An.gambiae	HG	Negative	Neg	Neg
04060203	4.80074	36.0506	5	05-08/06/2023	PSC	In	An.gambiae	FF	Negative	Neg	Neg
04070201	4.80121	36.0504	5	05-08/06/2023	PSC	In	An.gambiae	UF		Neg
04070202	4.80121	36.0504	5	05-08/06/2023	PSC	In	An.gambiae	UF		Neg
04080201	4.80105	36.0506	5	05-08/06/2023	PSC	In	An.gambiae	UF		Neg
04130101	4,801770	36,049660	5	05-08/06/2023	CDC	In	An.gambiae	UF		Neg
04160101	4,802090	36,050060	5	05-08/06/2023	CDC	Out	An.gambiae	HG	Negative	Neg	Neg
04160102	4,802090	36,050060	5	05-08/06/2023	CDC	Out	An.gambiae	HG	Goat and Cow	Neg	Neg
04200201	4.80212	36,050400	5	05-08/06/2023	PSC	In	An.gambiae	HG	Goat	Neg	Neg
04200202	4.80212	36,050400	5	05-08/06/2023	PSC	In	An.gambiae	UF		Neg
04200203	4.80212	36,050400	5	05-08/06/2023	PSC	In	An.gambiae	UF		Neg
05070101	6.22371	36.1268	1	30-31/05/2022	CDC	In	An.gambiae	FF	Human	Neg	Neg
05070102	6.22371	36.1268	1	30-31/05/2022	CDC	Out	An.gambiae	UF		Neg
05080101	6.22333	36.1269	1	30-31/05/2022	CDC	In	An.gambiae	FF	Human	Neg	Neg
05080102	6.22333	36.1269	1	30-31/05/2022	CDC	In	An.gambiae	UF		Neg
05110101	6.22511	36.1314	1	30-31/05/2022	CDC	In	An.gambiae	HG	Human	Neg	Pf
05110102	6.22511	36.1314	1	30-31/05/2022	CDC	In	An.gambiae	UF		Neg
05110103	6.22511	36.1314	1	30-31/05/2022	CDC	In	An.gambiae	HG	Human	Neg	Pf
05110104	6.22511	36.1314	1	30-31/05/2022	CDC	In	An.gambiae	UF		Neg
05110105	6.22511	36.1314	1	30-31/05/2022	CDC	In	An.gambiae	UF		Neg
05110106	6.22511	36.1314	1	30-31/05/2022	CDC	In	An.gambiae	UF		Neg
05110107	6.22511	36.1314	1	30-31/05/2022	CDC	In	An.gambiae	UF		Neg
05110108	6.22511	36.1314	1	30-31/05/2022	CDC	In	An.gambiae	FF	Human	Neg	Neg
05110109	6.22511	36.1314	1	30-31/05/2022	CDC	In	An.gambiae	UF		Neg
05110110	6.22511	36.1314	1	30-31/05/2022	CDC	In	An.gambiae	HG	Human	Neg	Neg
05110111	6.22511	36.1314	1	30-31/05/2022	CDC	In	An.gambiae	UF		Neg
05110112	6.22511	36.1314	1	30-31/05/2022	CDC	In	An.gambiae	UF		Neg
05110113	6.22511	36.1314	1	30-31/05/2022	CDC	In	An.gambiae	FF	Human	Neg	Neg
05110114	6.22511	36.1314	1	30-31/05/2022	CDC	In	An.gambiae	UF		Neg
05110115	6.22511	36.1314	1	30-31/05/2022	CDC	In	An.gambiae	FF	Negative	Neg	Pf
05110116	6.22511	36.1314	1	30-31/05/2022	CDC	In	An.gambiae	UF		Neg
05110117	6.22511	36.1314	1	30-31/05/2022	CDC	In	An.gambiae	UF		Neg
05110118	6.22511	36.1314	1	30-31/05/2022	CDC	In	An.gambiae	UF		Neg
05110119	6.22511	36.1314	1	30-31/05/2022	CDC	Out	An.gambiae	FF	Human	Neg	Neg
05110120	6.22511	36.1314	1	30-31/05/2022	CDC	Out	An.gambiae	UF		Neg
05110121	6.22511	36.1314	1	30-31/05/2022	CDC	Out	An.gambiae	HG	Human	Neg	Neg
05110122	6.22511	36.1314	1	30-31/05/2022	CDC	Out	An.gambiae	UF		Neg
05110123	6.22511	36.1314	1	30-31/05/2022	CDC	Out	An.gambiae	UF		Neg
05110124	6.22511	36.1314	1	30-31/05/2022	CDC	Out	An.gambiae	UF		Neg
05110125	6.22511	36.1314	1	30-31/05/2022	CDC	Out	An.gambiae	UF		Neg
05110126	6.22511	36.1314	1	30-31/05/2022	CDC	Out	An.gambiae	HG	Negative	Neg	Neg
05110127	6.22511	36.1314	1	30-31/05/2022	CDC	Out	An.gambiae	UF		Neg
05110128	6.22511	36.1314	1	30-31/05/2022	CDC	Out	An.gambiae	UF		Neg
05110129	6.22511	36.1314	1	30-31/05/2022	CDC	Out	An.gambiae	UF		Neg
05110130	6.22511	36.1314	1	30-31/05/2022	CDC	Out	An.gambiae	FF	Goat and Human	Neg	Neg
05120101	6.22525	36,131330	1	30-31/05/2022	CDC	In	An.gambiae	UF		Neg
05120102	6.22525	36,131330	1	30-31/05/2022	CDC	In	An.gambiae	UF		Neg
05120103	6.22525	36,131330	1	30-31/05/2022	CDC	In	An.gambiae	UF		Neg
05120104	6.22525	36,131330	1	30-31/05/2022	CDC	Out	An.gambiae	UF		Neg
05120105	6.22525	36,131330	1	30-31/05/2022	CDC	Out	An.gambiae	UF		Neg
05120106	6.22525	36,131330	1	30-31/05/2022	CDC	Out	An.gambiae	UF		Pv-210
05120107	6.22525	36,131330	1	30-31/05/2022	CDC	Out	An.gambiae	HG	Human	Neg	Neg
05130101	6.22575	36.1313	1	30-31/05/2022	CDC	In	An.gambiae	UF		Neg
05130102	6.22575	36.1313	1	30-31/05/2022	CDC	Out	An.gambiae	FF	Cow	Neg	Neg
05130103	6.22575	36.1313	1	30-31/05/2022	CDC	Out	An.gambiae	UF		Neg
05130104	6.22575	36.1313	1	30-31/05/2022	CDC	Out	An.gambiae	HG	Negative	Neg	Neg
05140101	6,226450	36.1319	1	30-31/05/2022	CDC	In	An.gambiae	UF		Neg
05140102	6,226450	36.1319	1	30-31/05/2022	CDC	In	An.gambiae	UF		Neg
05140103	6,226450	36.1319	1	30-31/05/2022	CDC	In	An.gambiae	HG	Human	Neg	Neg
05140104	6,226450	36.1319	1	30-31/05/2022	CDC	In	An.gambiae	UF		Neg
05140105	6,226450	36.1319	1	30-31/05/2022	CDC	Out	An.gambiae	FF	Negative	Neg	Neg
05140106	6,226450	36.1319	1	30-31/05/2022	CDC	Out	An.gambiae	UF		Neg
05150101	6.22547	36.1327	1	30-31/05/2022	CDC	In	An.gambiae	UF		Neg
05150102	6.22547	36.1327	1	30-31/05/2022	CDC	In	An.gambiae	UF		Neg
05150103	6.22547	36.1327	1	30-31/05/2022	CDC	In	An.gambiae	UF		Neg
05150104	6.22547	36.1327	1	30-31/05/2022	CDC	In	An.gambiae	HG	Negative	Neg	Neg
05150105	6.22547	36.1327	1	30-31/05/2022	CDC	In	An.gambiae	HG	Negative	Neg	Neg
05150106	6.22547	36.1327	1	30-31/05/2022	CDC	In	An.gambiae	UF		Neg
05150107	6.22547	36.1327	1	30-31/05/2022	CDC	In	An.gambiae	UF		Neg
05150108	6.22547	36.1327	1	30-31/05/2022	CDC	In	An.gambiae	FF	Negative	Neg	Neg
05150109	6.22547	36.1327	1	30-31/05/2022	CDC	In	An.gambiae	UF		Neg
05150110	6.22547	36.1327	1	30-31/05/2022	CDC	In	An.gambiae	UF		Neg
05150111	6.22547	36.1327	1	30-31/05/2022	CDC	In	An.gambiae	HG	Human	Neg	Neg
05150112	6.22547	36.1327	1	30-31/05/2022	CDC	In	An.gambiae	UF		Neg
05150113	6.22547	36.1327	1	30-31/05/2022	CDC	In	An.gambiae	UF		Neg
05150114	6.22547	36.1327	1	30-31/05/2022	CDC	In	An.gambiae	UF		Neg
05150115	6.22547	36.1327	1	30-31/05/2022	CDC	In	An.gambiae	UF		Neg
05150116	6.22547	36.1327	1	30-31/05/2022	CDC	In	An.gambiae	UF		Neg
05150117	6.22547	36.1327	1	30-31/05/2022	CDC	In	An.gambiae	HG	Negative	Neg	Neg
05150118	6.22547	36.1327	1	30-31/05/2022	CDC	In	An.gambiae	HG	Goat	Neg	Neg
05150119	6.22547	36.1327	1	30-31/05/2022	CDC	In	An.gambiae	UF		Neg
05150120	6.22547	36.1327	1	30-31/05/2022	CDC	In	An.gambiae	UF		Neg
05150121	6.22547	36.1327	1	30-31/05/2022	CDC	In	An.gambiae	UF		Neg
05150122	6.22547	36.1327	1	30-31/05/2022	CDC	In	An.gambiae	FF	Goat	Neg	Neg
05150123	6.22547	36.1327	1	30-31/05/2022	CDC	In	An.gambiae	UF		Neg
05150124	6.22547	36.1327	1	30-31/05/2022	CDC	In	An.gambiae	UF		Neg
05150125	6.22547	36.1327	1	30-31/05/2022	CDC	In	An.gambiae	UF		Neg
05150126	6.22547	36.1327	1	30-31/05/2022	CDC	In	An.gambiae	FF	Negative	Neg	Neg
05150127	6.22547	36.1327	1	30-31/05/2022	CDC	In	An.gambiae	FF	Human	Neg	Neg
05150128	6.22547	36.1327	1	30-31/05/2022	CDC	In	An.gambiae	FF	Human	Neg	Neg
05150129	6.22547	36.1327	1	30-31/05/2022	CDC	In	An.gambiae	FF	Negative	Neg	Neg
05150130	6.22547	36.1327	1	30-31/05/2022	CDC	Out	An.gambiae	UF		Neg
05150131	6.22547	36.1327	1	30-31/05/2022	CDC	Out	An.gambiae	UF		Neg
05160101	6.22498	36.1319	1	30-31/05/2022	CDC	In	An.gambiae	UF		Neg
05160102	6.22498	36.1319	1	30-31/05/2022	CDC	In	An.gambiae	UF		Neg
05160103	6.22498	36.1319	1	30-31/05/2022	CDC	In	An.gambiae	UF		Neg
05160104	6.22498	36.1319	1	30-31/05/2022	CDC	In	An.gambiae	HG	Negative	Neg	Neg
05160105	6.22498	36.1319	1	30-31/05/2022	CDC	In	An.gambiae	UF		Neg
05160106	6.22498	36.1319	1	30-31/05/2022	CDC	In	An.gambiae	FF	Human	Neg	Neg
05160107	6.22498	36.1319	1	30-31/05/2022	CDC	In	An.gambiae	UF		Neg
05160108	6.22498	36.1319	1	30-31/05/2022	CDC	In	An.gambiae	UF		Neg
05160109	6.22498	36.1319	1	30-31/05/2022	CDC	In	An.gambiae	UF		Neg
05160110	6.22498	36.1319	1	30-31/05/2022	CDC	In	An.gambiae	UF		Neg
05160111	6.22498	36.1319	1	30-31/05/2022	CDC	In	An.gambiae	HG	Goat and Human	Neg	Neg
05160112	6.22498	36.1319	1	30-31/05/2022	CDC	In	An.gambiae	UF		Neg
05160113	6.22498	36.1319	1	30-31/05/2022	CDC	In	An.gambiae	UF		Neg
05160114	6.22498	36.1319	1	30-31/05/2022	CDC	In	An.gambiae	UF		Neg
05160115	6.22498	36.1319	1	30-31/05/2022	CDC	In	An.gambiae	UF		Neg
05160116	6.22498	36.1319	1	30-31/05/2022	CDC	In	An.gambiae	UF		Neg
05160117	6.22498	36.1319	1	30-31/05/2022	CDC	In	An.gambiae	FF	Goat and Human	Neg	Neg
05160118	6.22498	36.1319	1	30-31/05/2022	CDC	In	An.gambiae	FF	Human	Neg	Neg
05160119	6.22498	36.1319	1	30-31/05/2022	CDC	In	An.gambiae	FF	Goat and Human	Neg	Neg
05160120	6.22498	36.1319	1	30-31/05/2022	CDC	In	An.gambiae	FF	Goat and Human	Neg	Neg
05160121	6.22498	36.1319	1	30-31/05/2022	CDC	In	An.gambiae	UF		Neg
05160122	6.22498	36.1319	1	30-31/05/2022	CDC	In	An.gambiae	FF	Goat and Human	Neg	Neg
05160123	6.22498	36.1319	1	30-31/05/2022	CDC	In	An.gambiae	FF	Goat and Human	Neg	Neg
05160124	6.22498	36.1319	1	30-31/05/2022	CDC	In	An.gambiae	FF	Goat and Human	Neg	Neg
05160125	6.22498	36.1319	1	30-31/05/2022	CDC	In	An.gambiae	FF	Goat and Human	Neg	Neg
05160126	6.22498	36.1319	1	30-31/05/2022	CDC	In	An.gambiae	UF		Neg
05160127	6.22498	36.1319	1	30-31/05/2022	CDC	In	An.gambiae	UF		Neg
05160128	6.22498	36.1319	1	30-31/05/2022	CDC	In	An.gambiae	UF		Neg
05160129	6.22498	36.1319	1	30-31/05/2022	CDC	In	An.gambiae	UF		Neg
05160130	6.22498	36.1319	1	30-31/05/2022	CDC	In	An.gambiae	UF		Neg
05160131	6.22498	36.1319	1	30-31/05/2022	CDC	In	An.gambiae	FF	Human	Neg	Neg
05160132	6.22498	36.1319	1	30-31/05/2022	CDC	In	An.gambiae	UF		Neg
05160133	6.22498	36.1319	1	30-31/05/2022	CDC	In	An.gambiae	UF		Neg
05160134	6.22498	36.1319	1	30-31/05/2022	CDC	In	An.gambiae	HG	Human	Neg	Neg
05160135	6.22498	36.1319	1	30-31/05/2022	CDC	In	An.gambiae	UF		Neg
05160136	6.22498	36.1319	1	30-31/05/2022	CDC	In	An.gambiae	UF		Neg
05160137	6.22498	36.1319	1	30-31/05/2022	CDC	In	An.gambiae	UF		Neg
05160138	6.22498	36.1319	1	30-31/05/2022	CDC	In	An.gambiae	UF		Neg
05070101	6.22676	36.1311	2	9-11/10/2022	CDC	In	An.gambiae	UF		Neg
05110101	6.22511	36.1314	2	9-11/10/2022	CDC	In	An.gambiae	HG	Human	Neg	Neg
05110102	6.22511	36.1314	2	9-11/10/2022	CDC	In	An.gambiae	UF		Neg
05120101	6.22525	36,131330	2	9-11/10/2022	CDC	In	An.pharoensis	UF		Neg
05120102	6.22525	36,131330	2	9-11/10/2022	CDC	In	An.gambiae	UF		Neg
05120103	6.22525	36,131330	2	9-11/10/2022	CDC	In	An.pharoensis	UF		Neg
05140101	6,226450	36.1319	2	9-11/10/2022	CDC	In	An.gambiae	FF	Human	Neg	Neg
05140102	6,226450	36.1319	2	9-11/10/2022	CDC	In	An.pharoensis	FF	Goat and Human	Neg	Neg
05140103	6,226450	36.1319	2	9-11/10/2022	CDC	In	An.gambiae	UF		Neg
05060201	6.22444	36.1271	3	22-24/01/2023	PSC	In	An.gambiae	UF		Neg
05010101	6.22642	36.1289	4	24-26/04/2023	CDC	In	An.gambiae	UF		Neg
05030201	6.22666	36.129	4	24-26/04/2023	PSC	In	An.gambiae	FF	Human	Neg	Neg
05030202	6.22666	36.129	4	24-26/04/2023	PSC	In	An.gambiae	FF	Human	Neg	Neg
05030203	6.22666	36.129	4	24-26/04/2023	PSC	In	An.gambiae	UF		Neg
05100201	6.22443	36.1277	4	24-26/04/2023	PSC	In	An.gambiae	FF	Goat and Human	Neg	Neg
05100202	6.22443	36.1277	4	24-26/04/2023	PSC	In	An.gambiae	FF	Goat and Human	Neg	Neg
05100203	6.22443	36.1277	4	24-26/04/2023	PSC	In	An.gambiae	FF	Goat and Human	Neg	Neg
05100204	6.22443	36.1277	4	24-26/04/2023	PSC	In	An.gambiae	UF		Neg
05100205	6.22443	36.1277	4	24-26/04/2023	PSC	In	An.gambiae	UF		Neg
05160101	6.22498	36.1319	4	24-26/04/2023	CDC	In	An.gambiae	FF	Human	Neg	Neg
05160102	6.22498	36.1319	4	24-26/04/2023	CDC	In	An.gambiae	UF		Neg
05170201	6.22676	36.1311	4	24-26/04/2023	PSC	In	An.gambiae	FF	Goat and Human	Neg	Neg
05170202	6.22676	36.1311	4	24-26/04/2023	PSC	In	An.gambiae	FF	Goat and Human	Neg	Neg
05200201	6,224200	36,129440	4	24-26/04/2023	PSC	In	An.gambiae	UF		Neg
05200202	6,224200	36,129440	4	24-26/04/2023	PSC	In	An.gambiae	UF		Neg
05020101	6,226210	36,127850	5	09-12/06/2023	CDC	In	An.gambiae	UF		Neg
05030201	6.22666	36.129	5	09-12/06/2023	PSC	In	An.gambiae	UF		Neg
05040201	6.22567	36.1278	5	09-12/06/2023	PSC	In	An.gambiae	UF		Neg
05050201	6,226470	36.1292	5	09-12/06/2023	PSC	In	An.gambiae	UF		Neg
05080101	6.22333	36.1269	5	09-12/06/2023	CDC	In	An.gambiae	UF		Neg
05080102	6.22333	36.1269	5	09-12/06/2023	CDC	In	An.gambiae	UF		Pv-210
